# Supplementary material for: Synthesis of medronic acid monoesters and their purification by high-performance countercurrent chromatography or by hydroxyapatite
Source: publisher site journal article supplement (doi:10.3762/bjoc.12.204), 2016-10-07

# Supporting Information File 2

for

## **Synthesis of medronic acid monoesters and their purification by high-performance countercurrent chromatography or by hydroxyapatite**

Elina Puljula\*, Jouko Vepsäläinen and Petri A. Turhanen

Address: School of Pharmacy, University of Eastern Finland, Biocenter Kuopio,  
P.O.Box 1627, FI-70211 Kuopio, Finland

Email: Elina Puljula - elina.puljula@uef.fi

\* Corresponding author

## **$^1\text{H}$ , $^{13}\text{C}$ , and $^{31}\text{P}$ NMR spectra and an example of HPLC chromatogram**

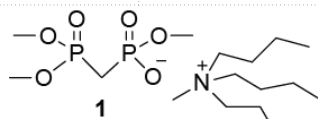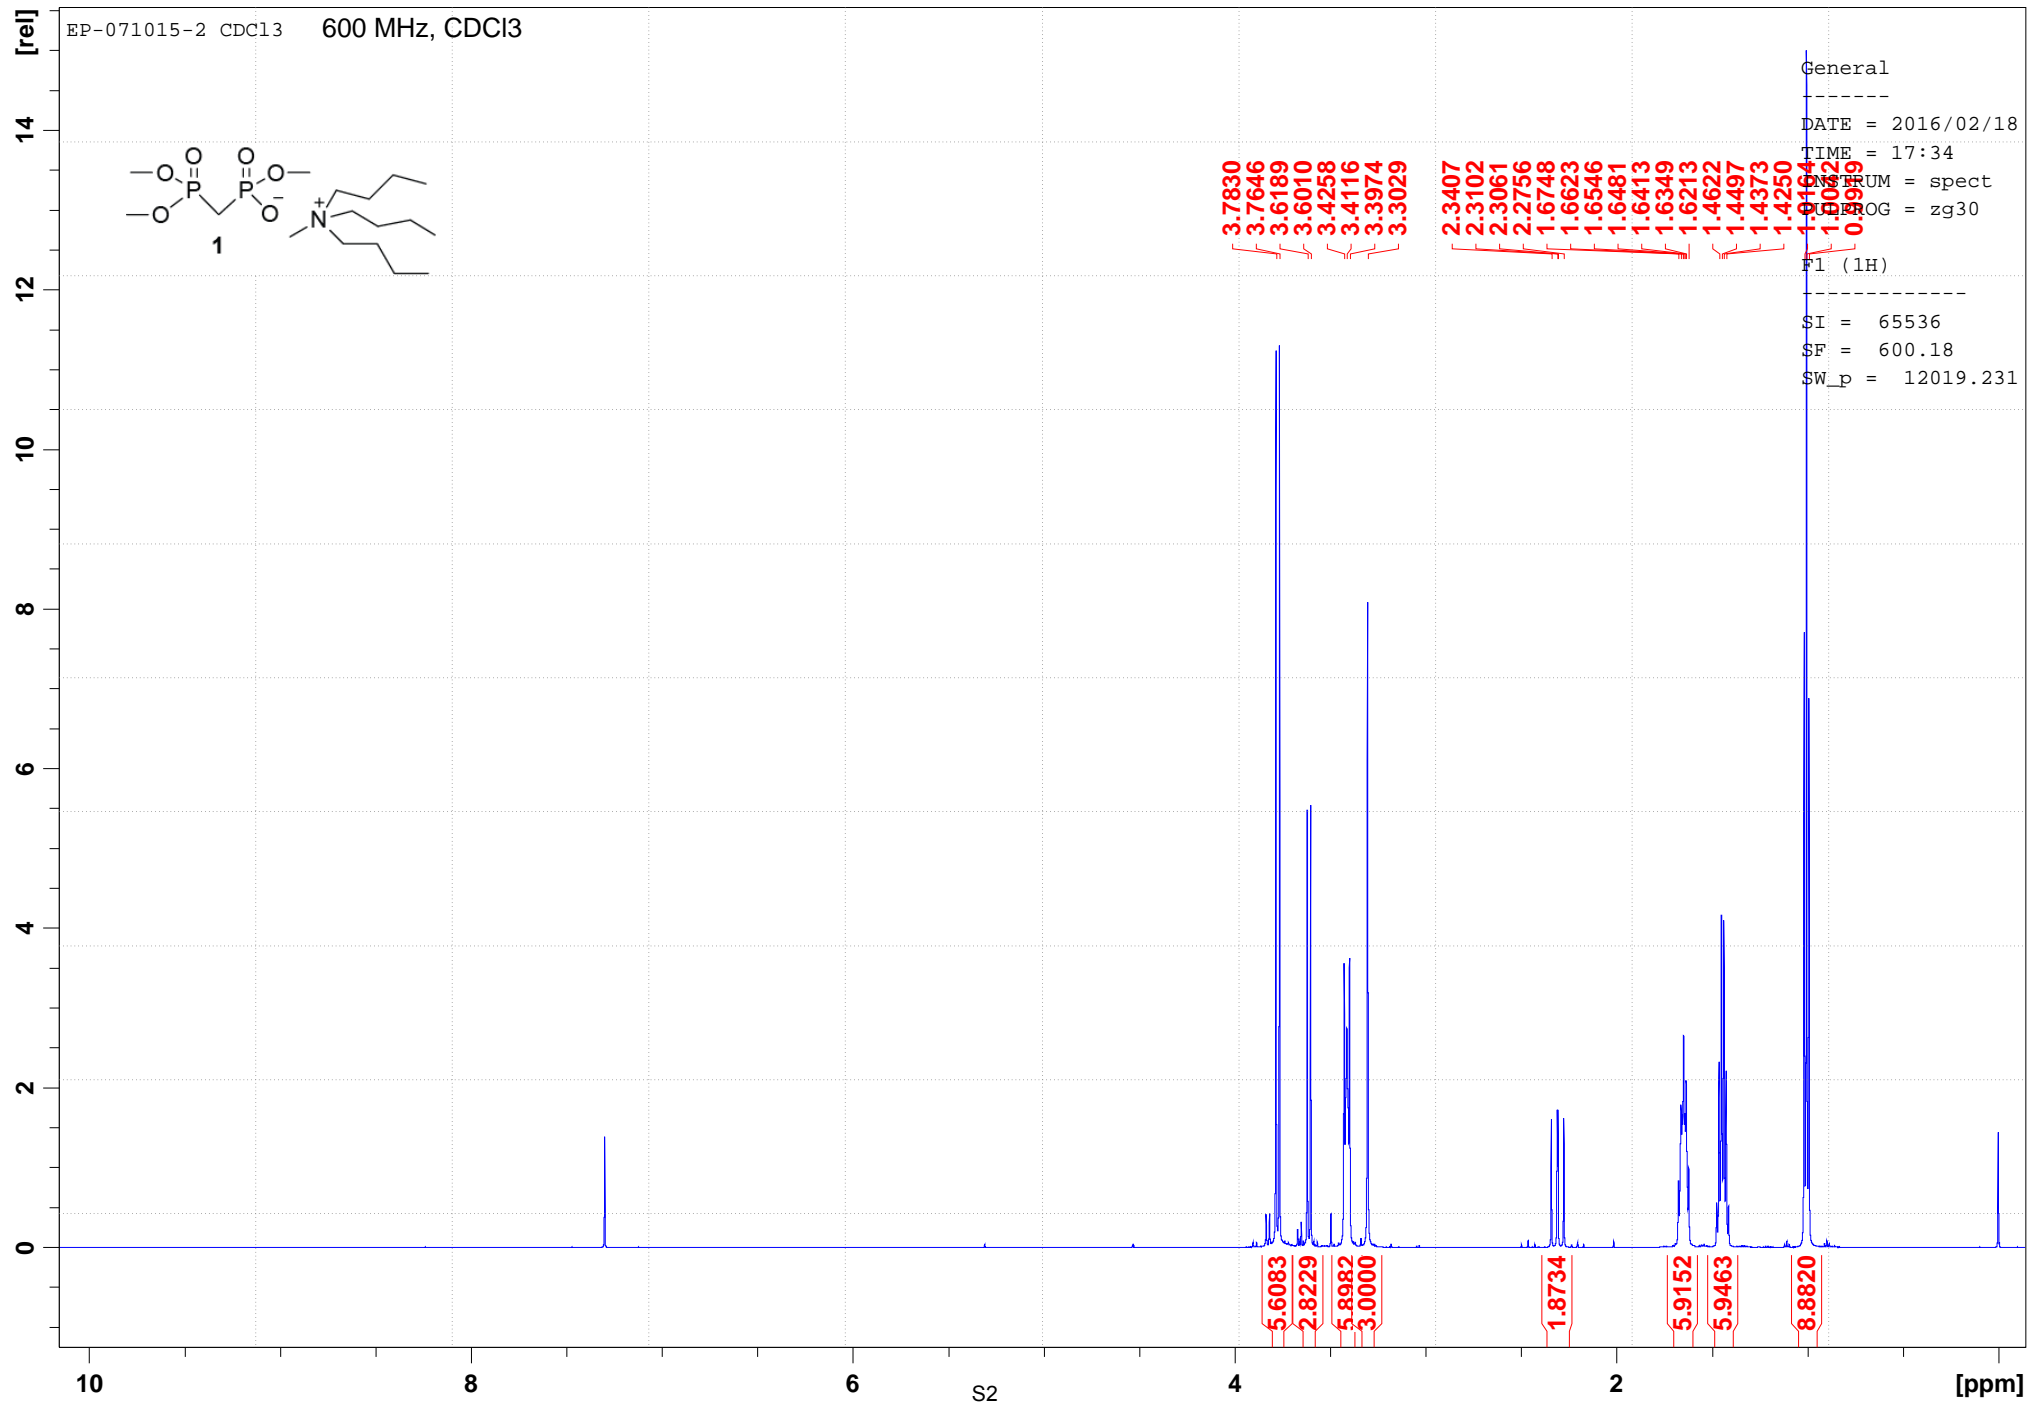

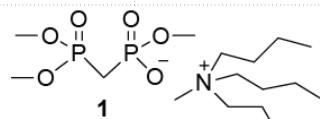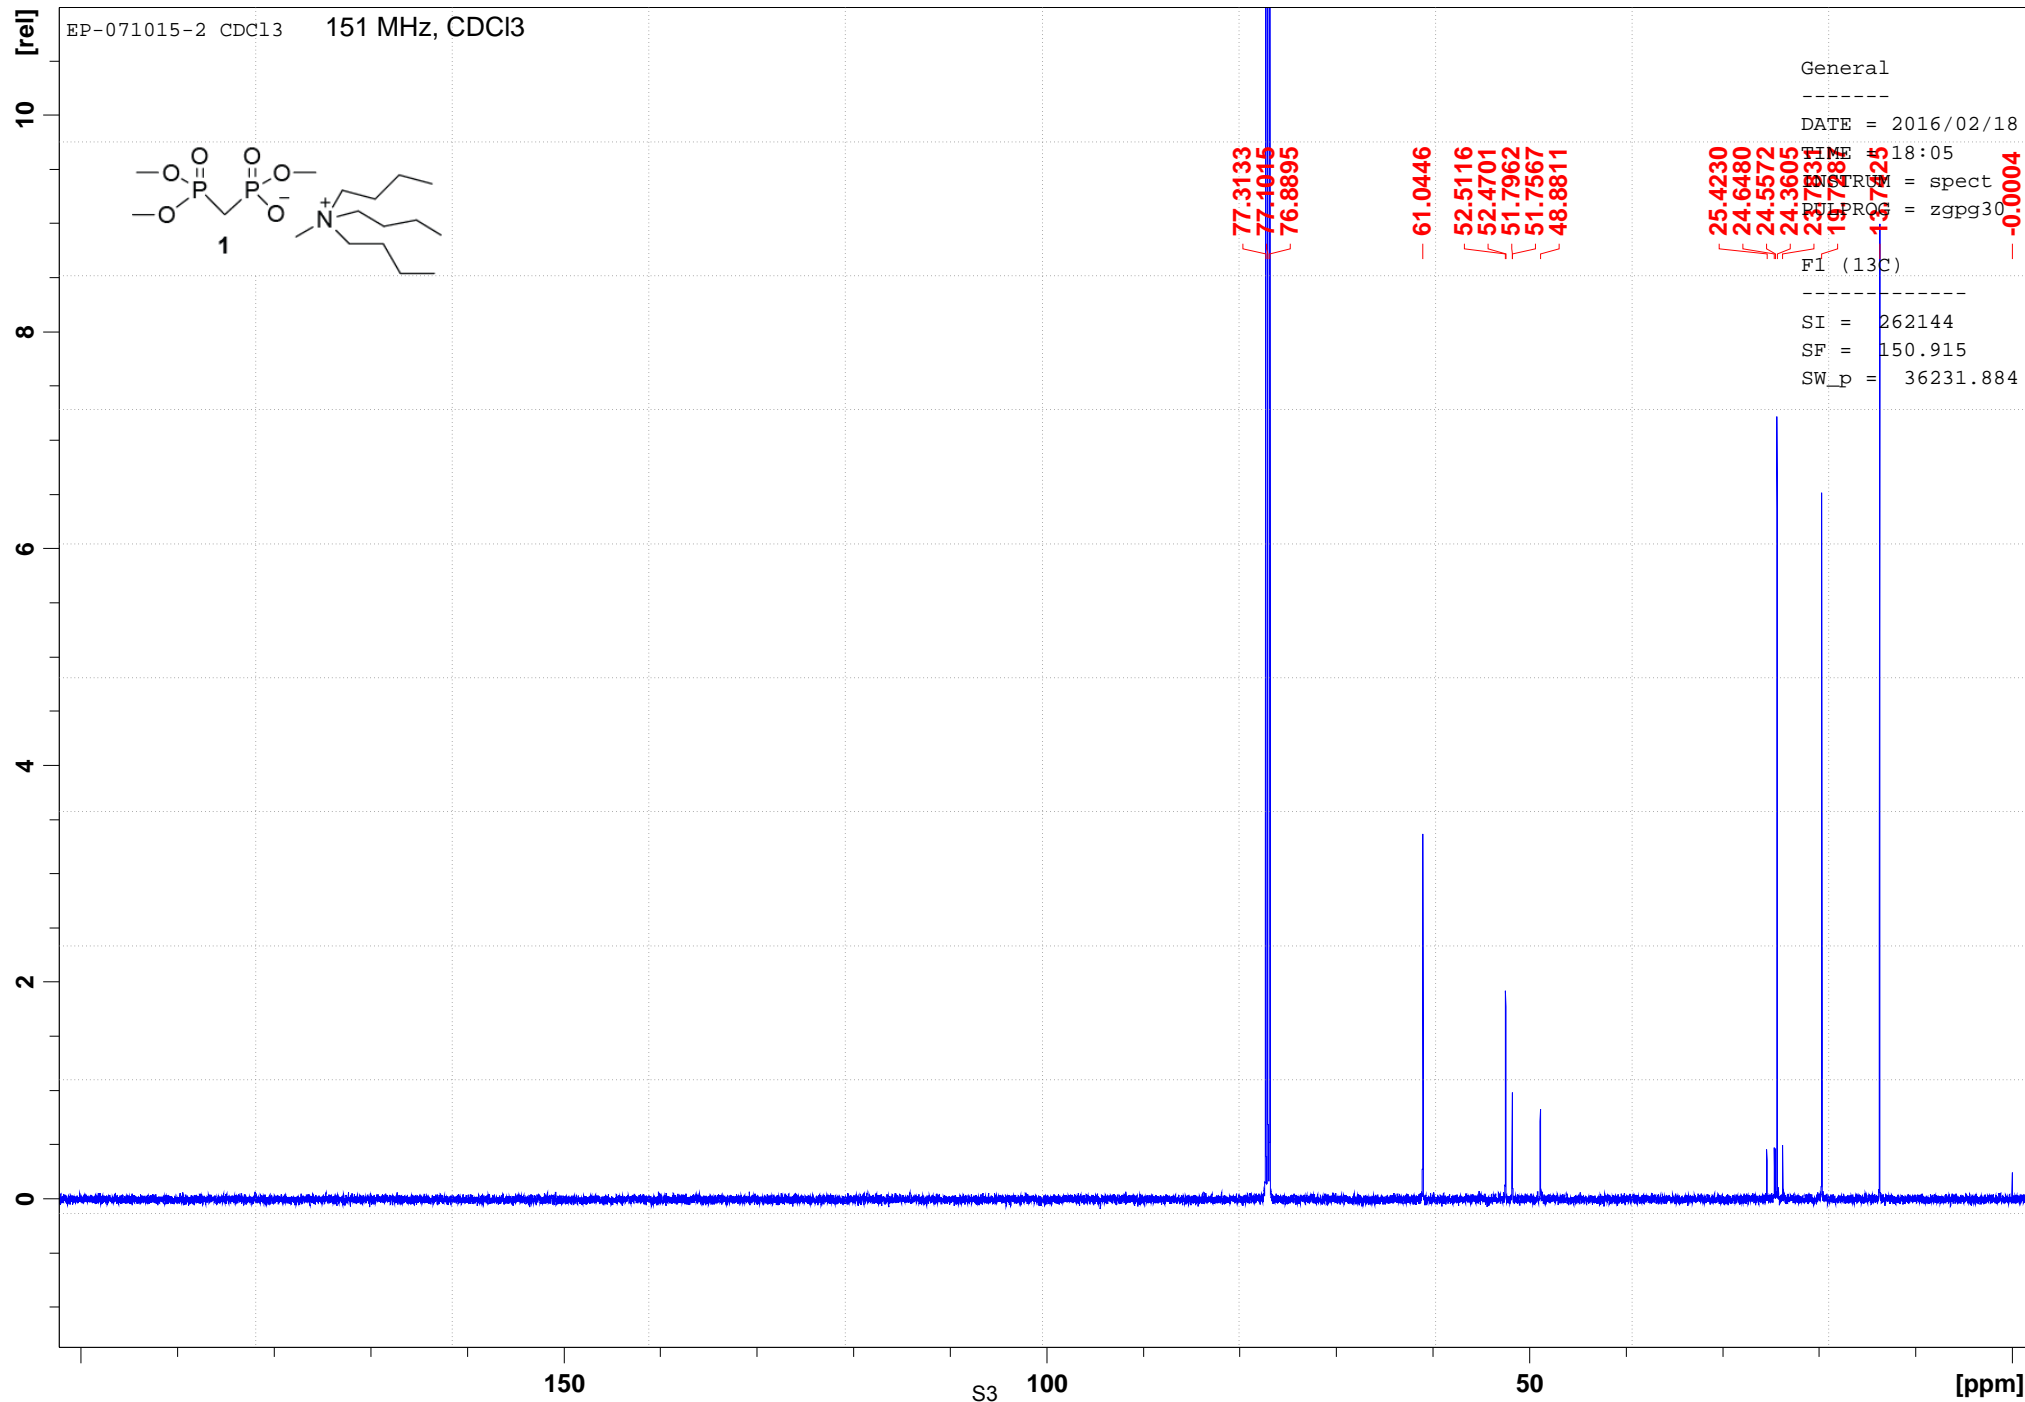

General

-----  
DATE = 2015/08/06  
TIME = 10:12  
INSTRUM = spect  
PULPROG = zgpg

F1 (31P)

-----  
SI = 32768  
SF = 202.456  
SW\_p = 20325.203

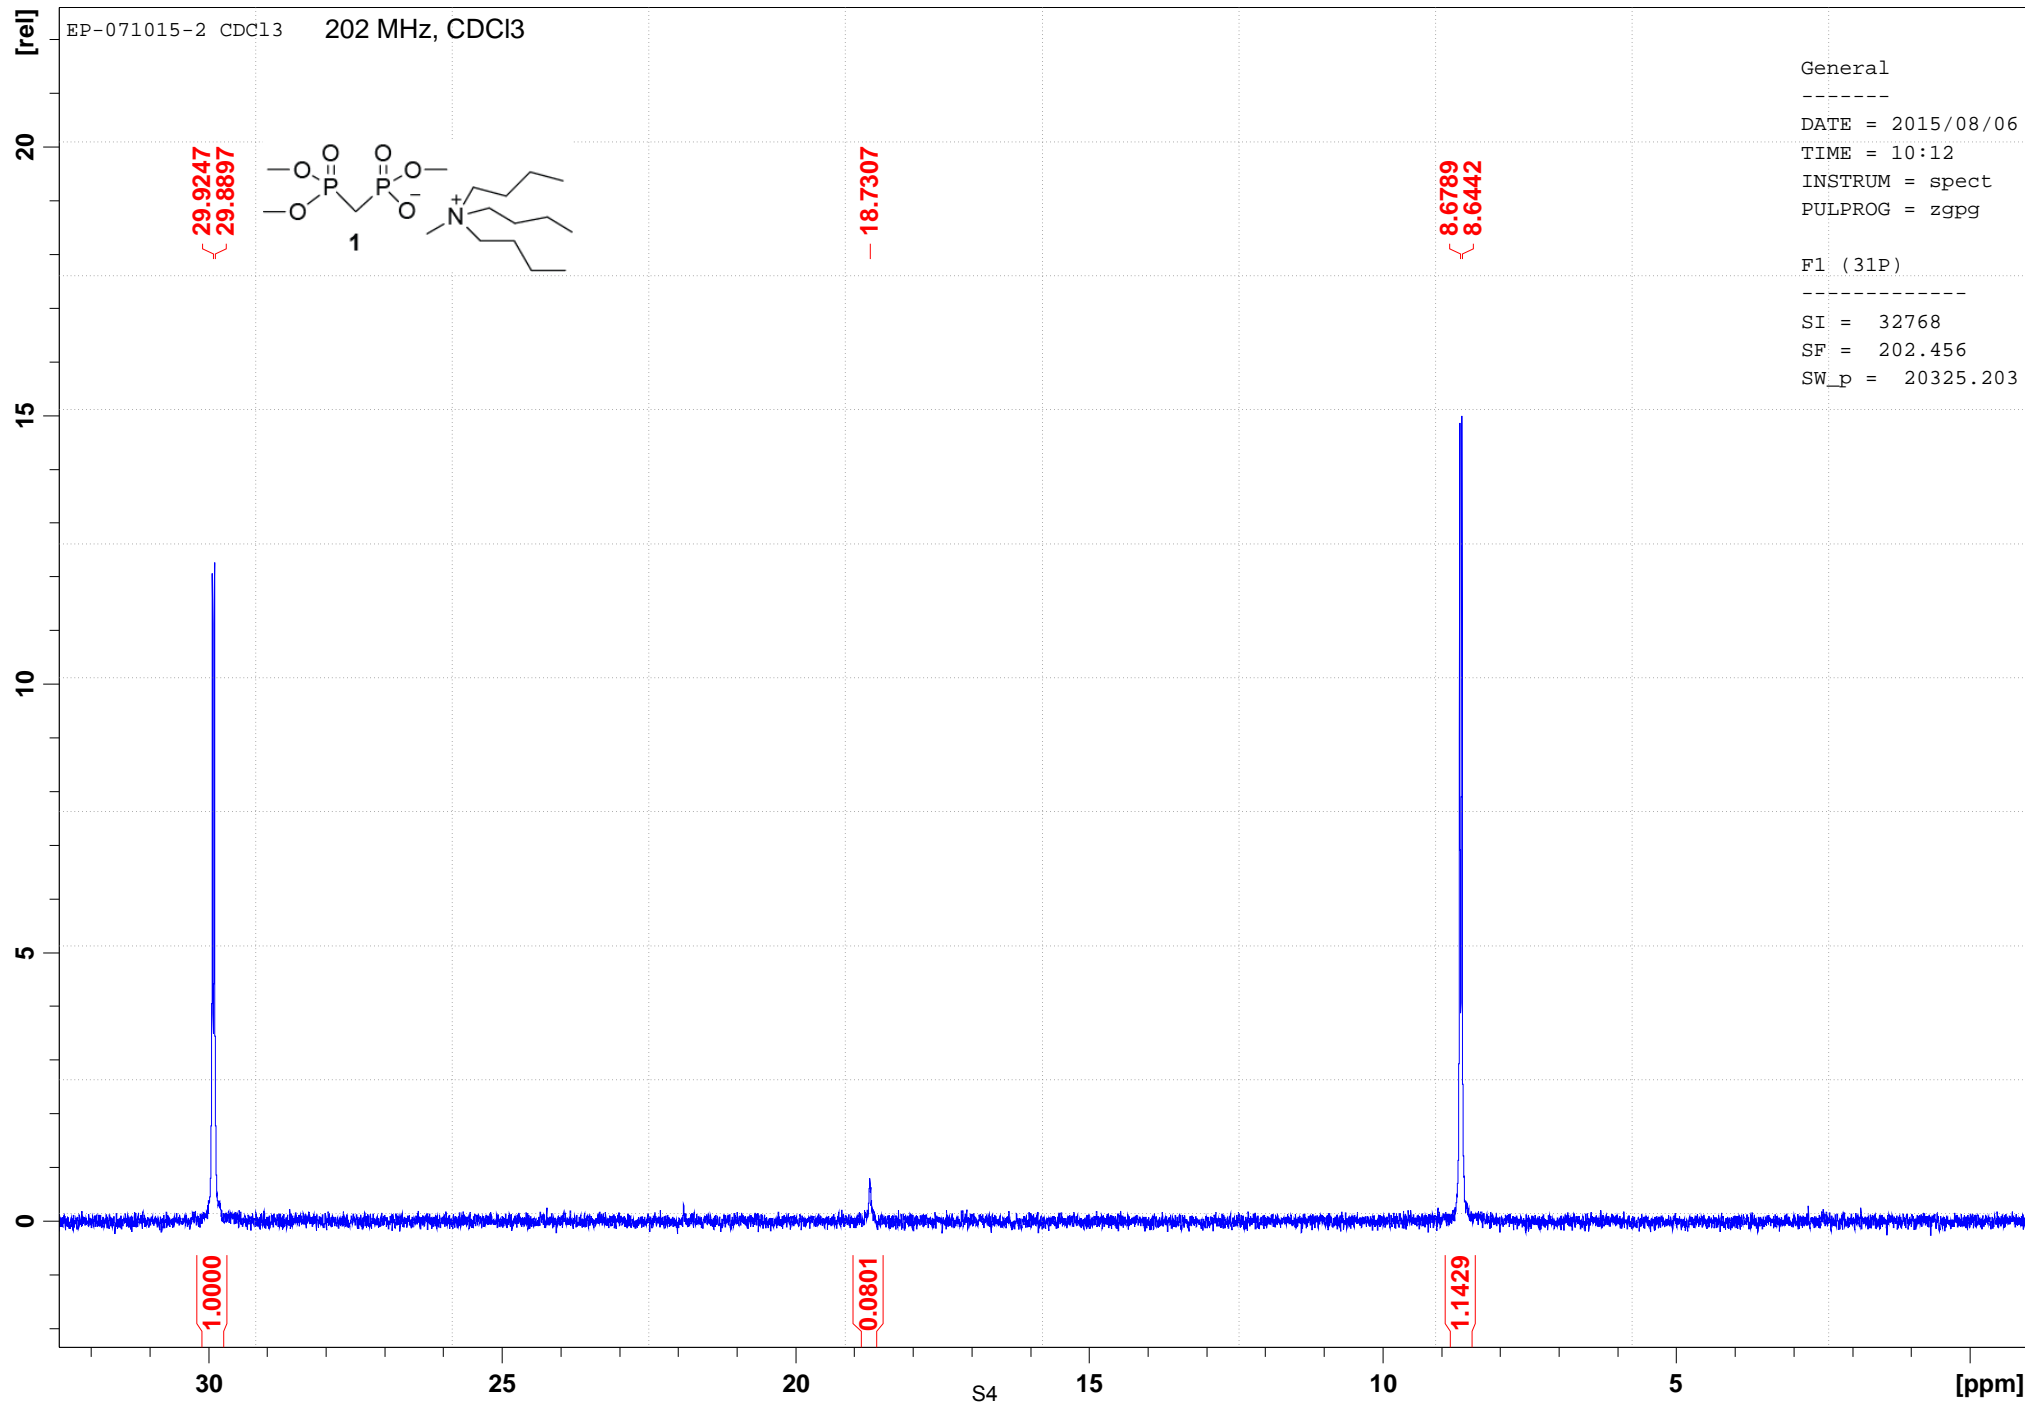

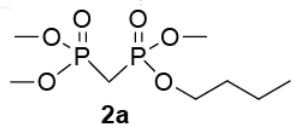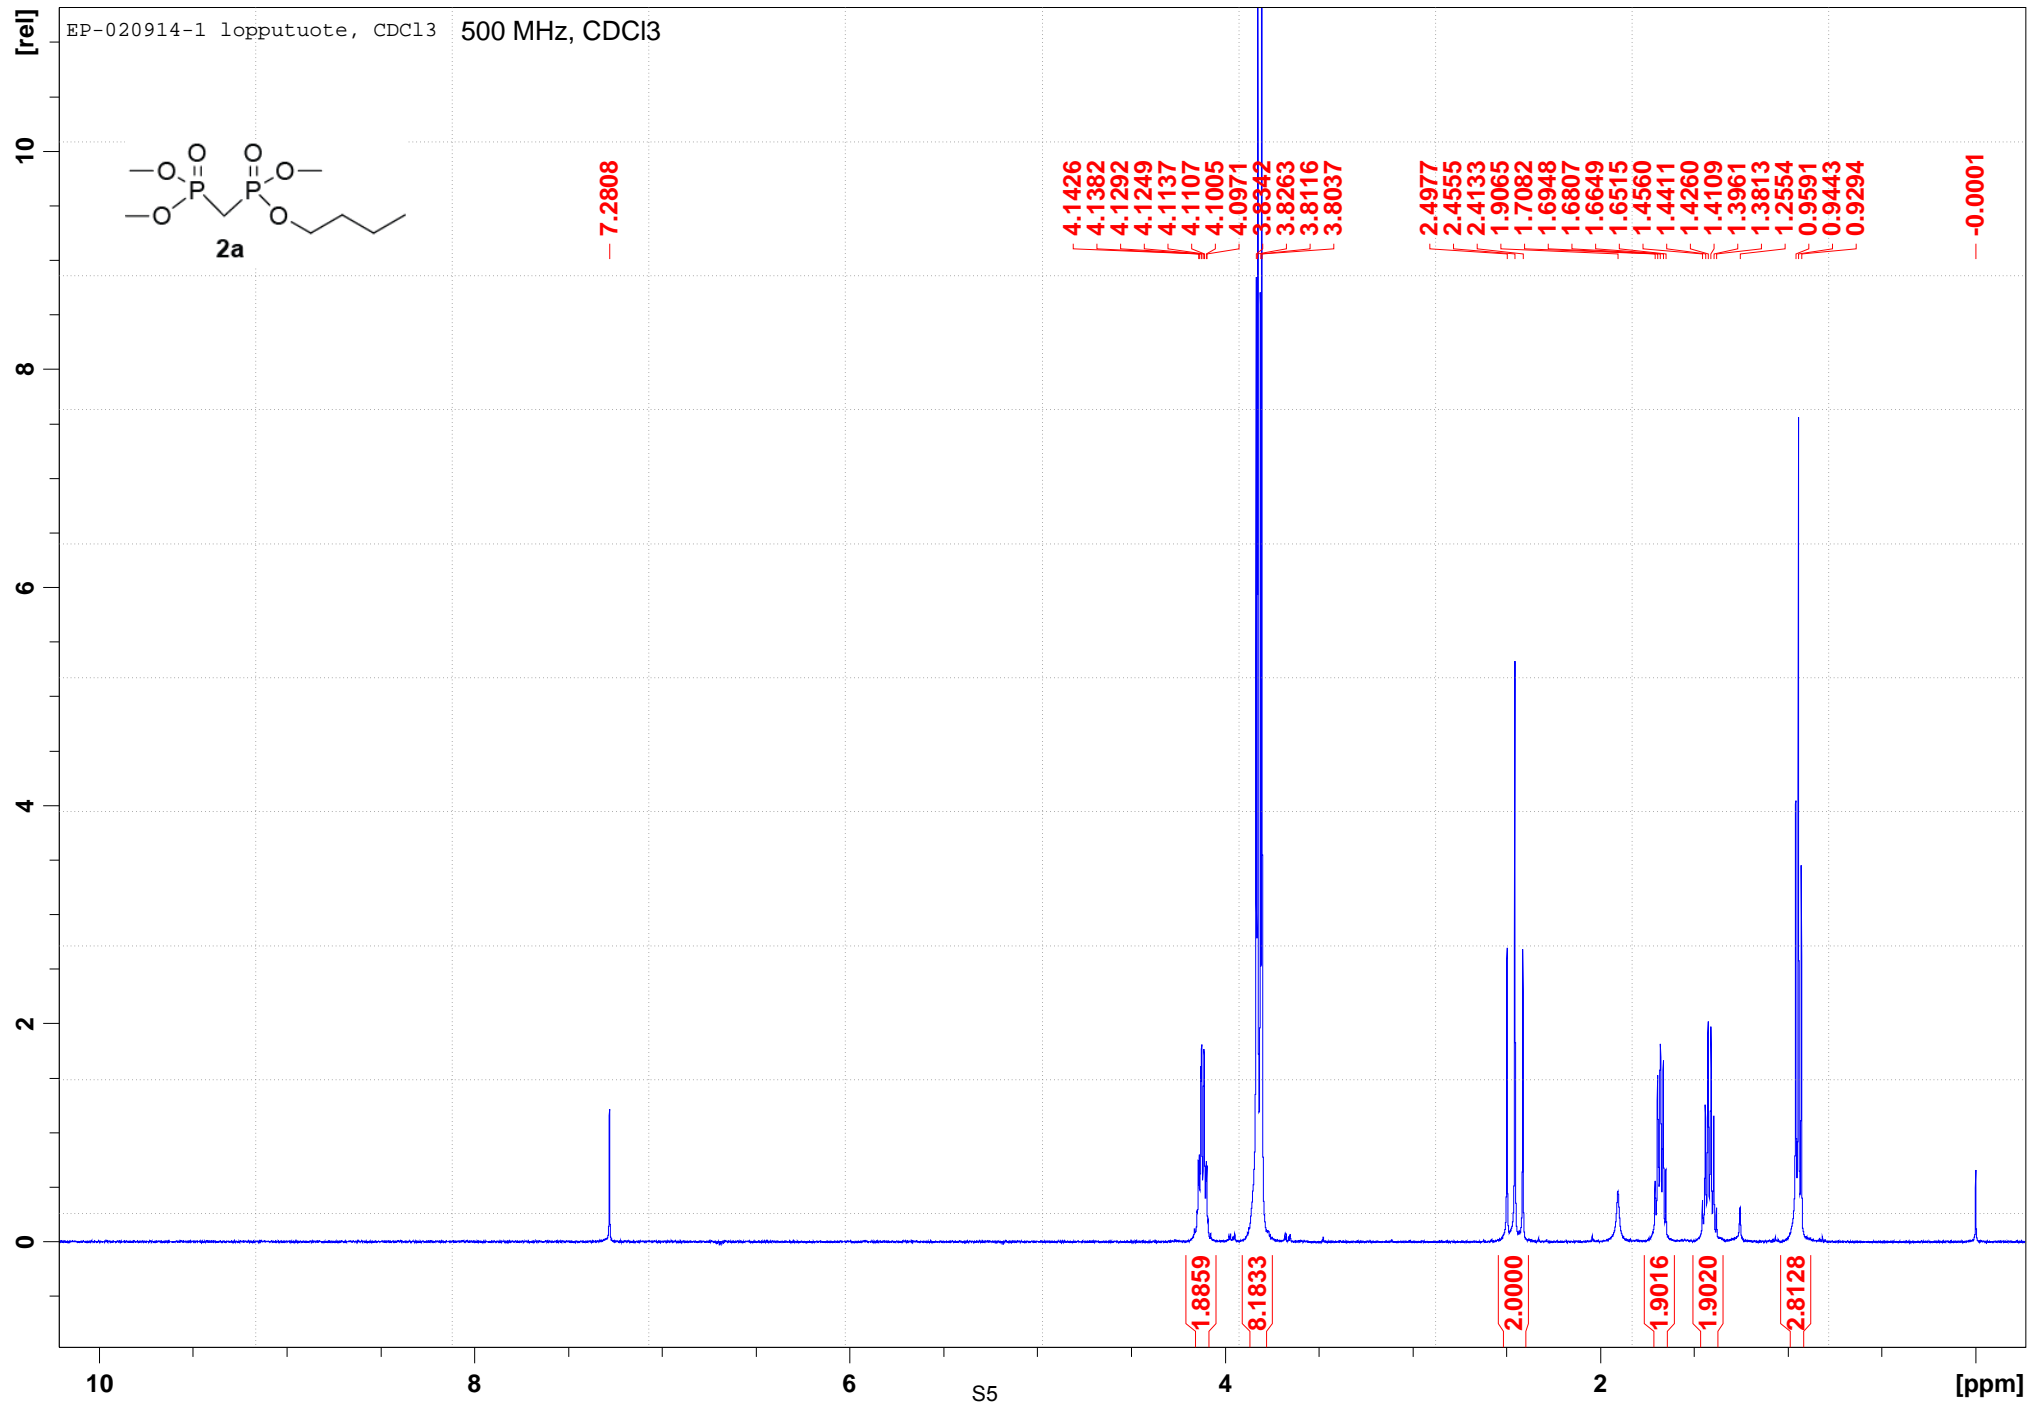

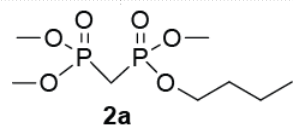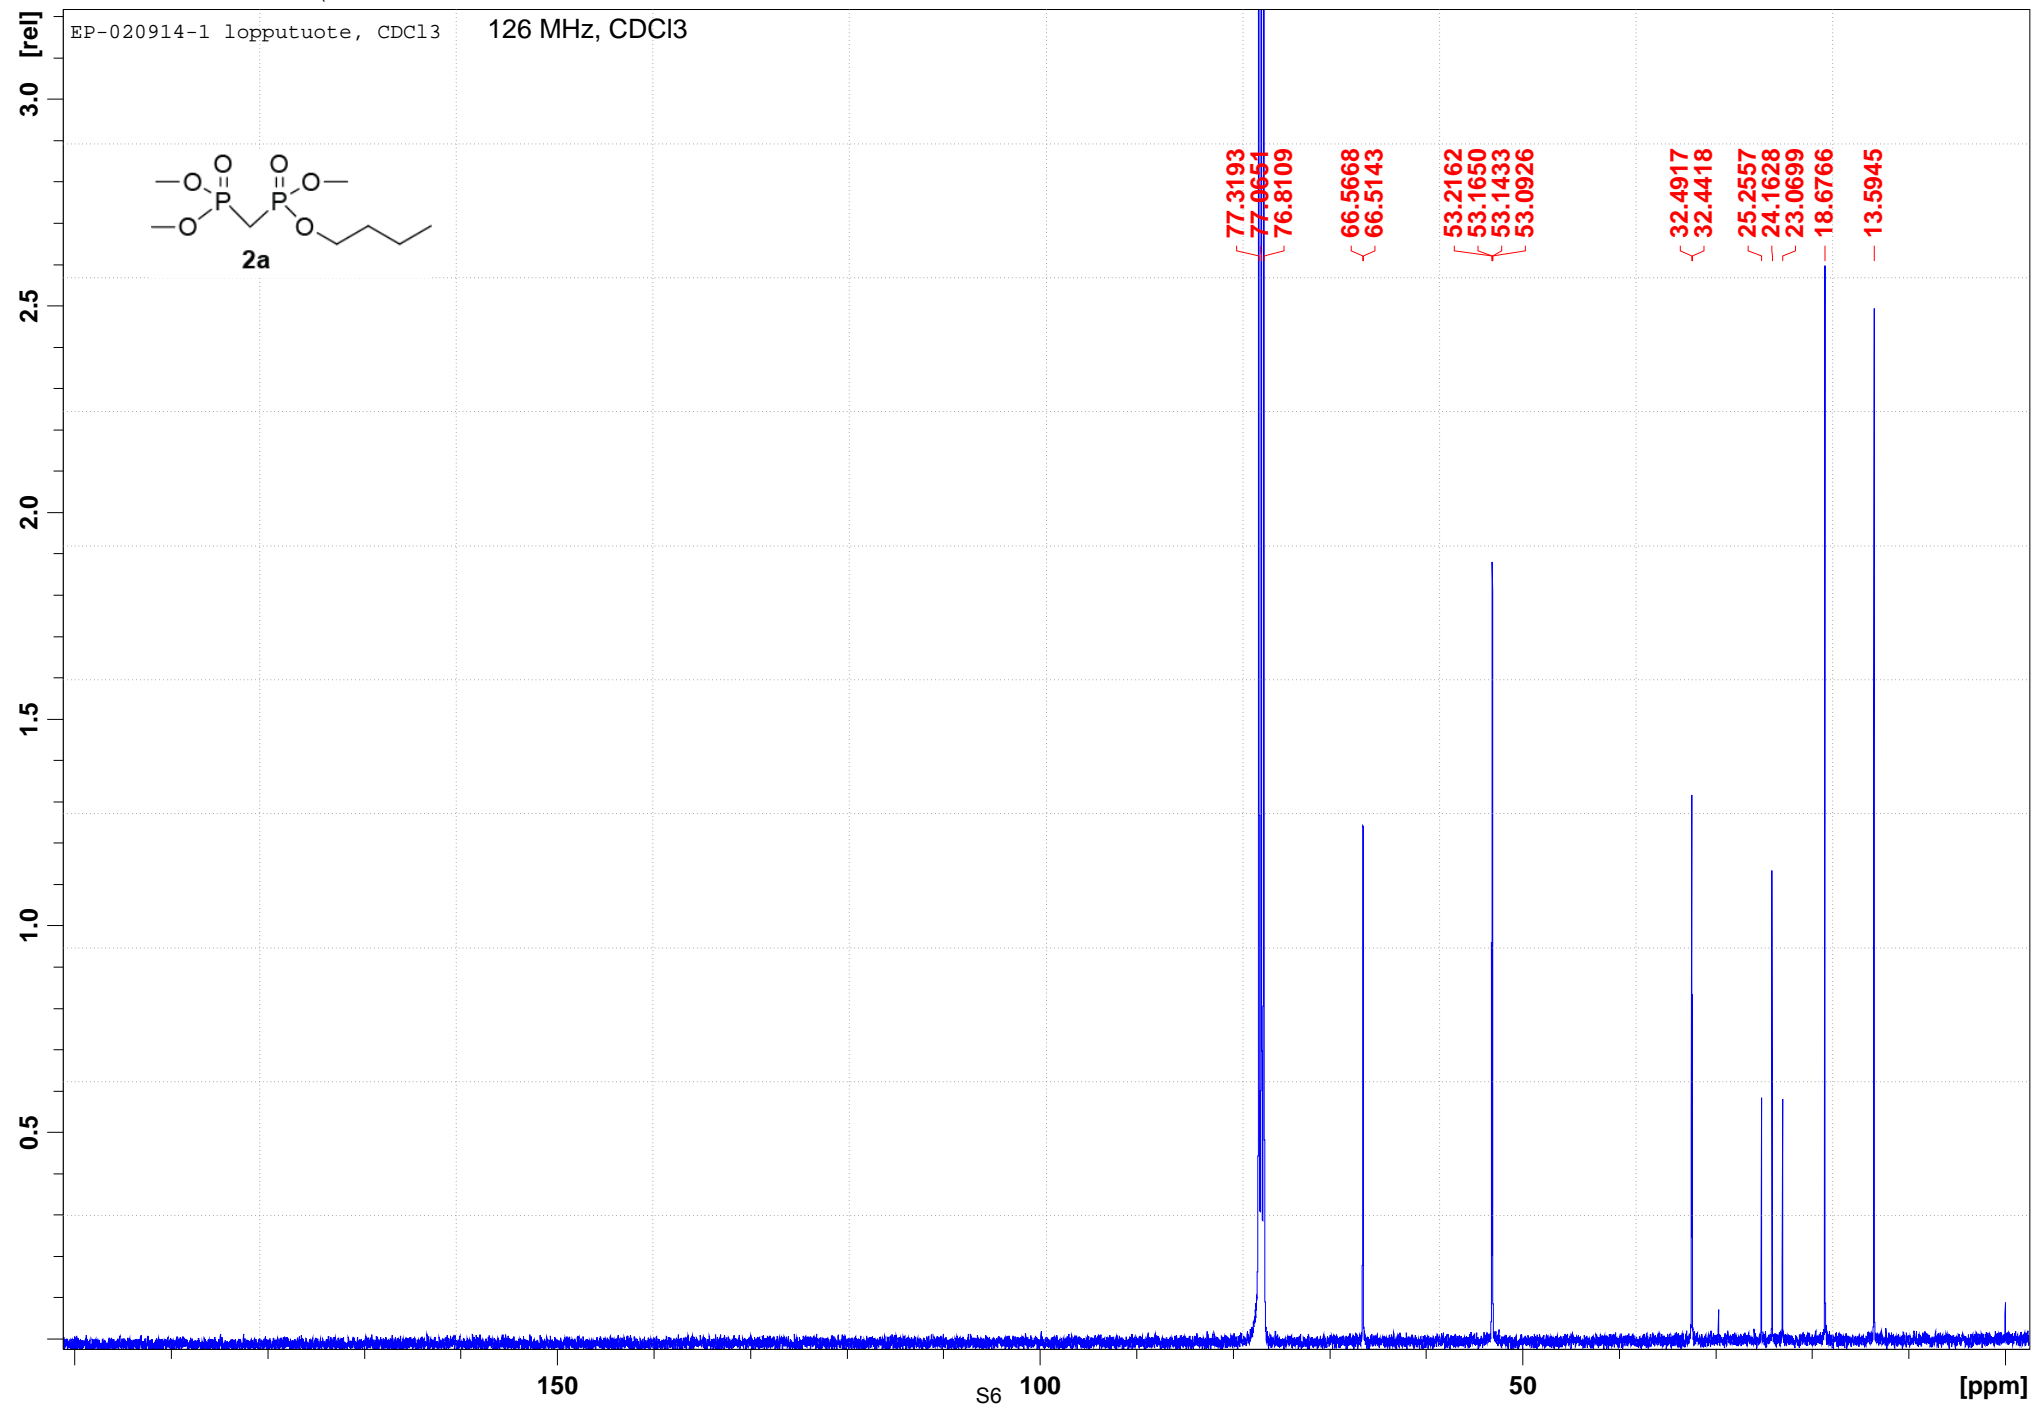

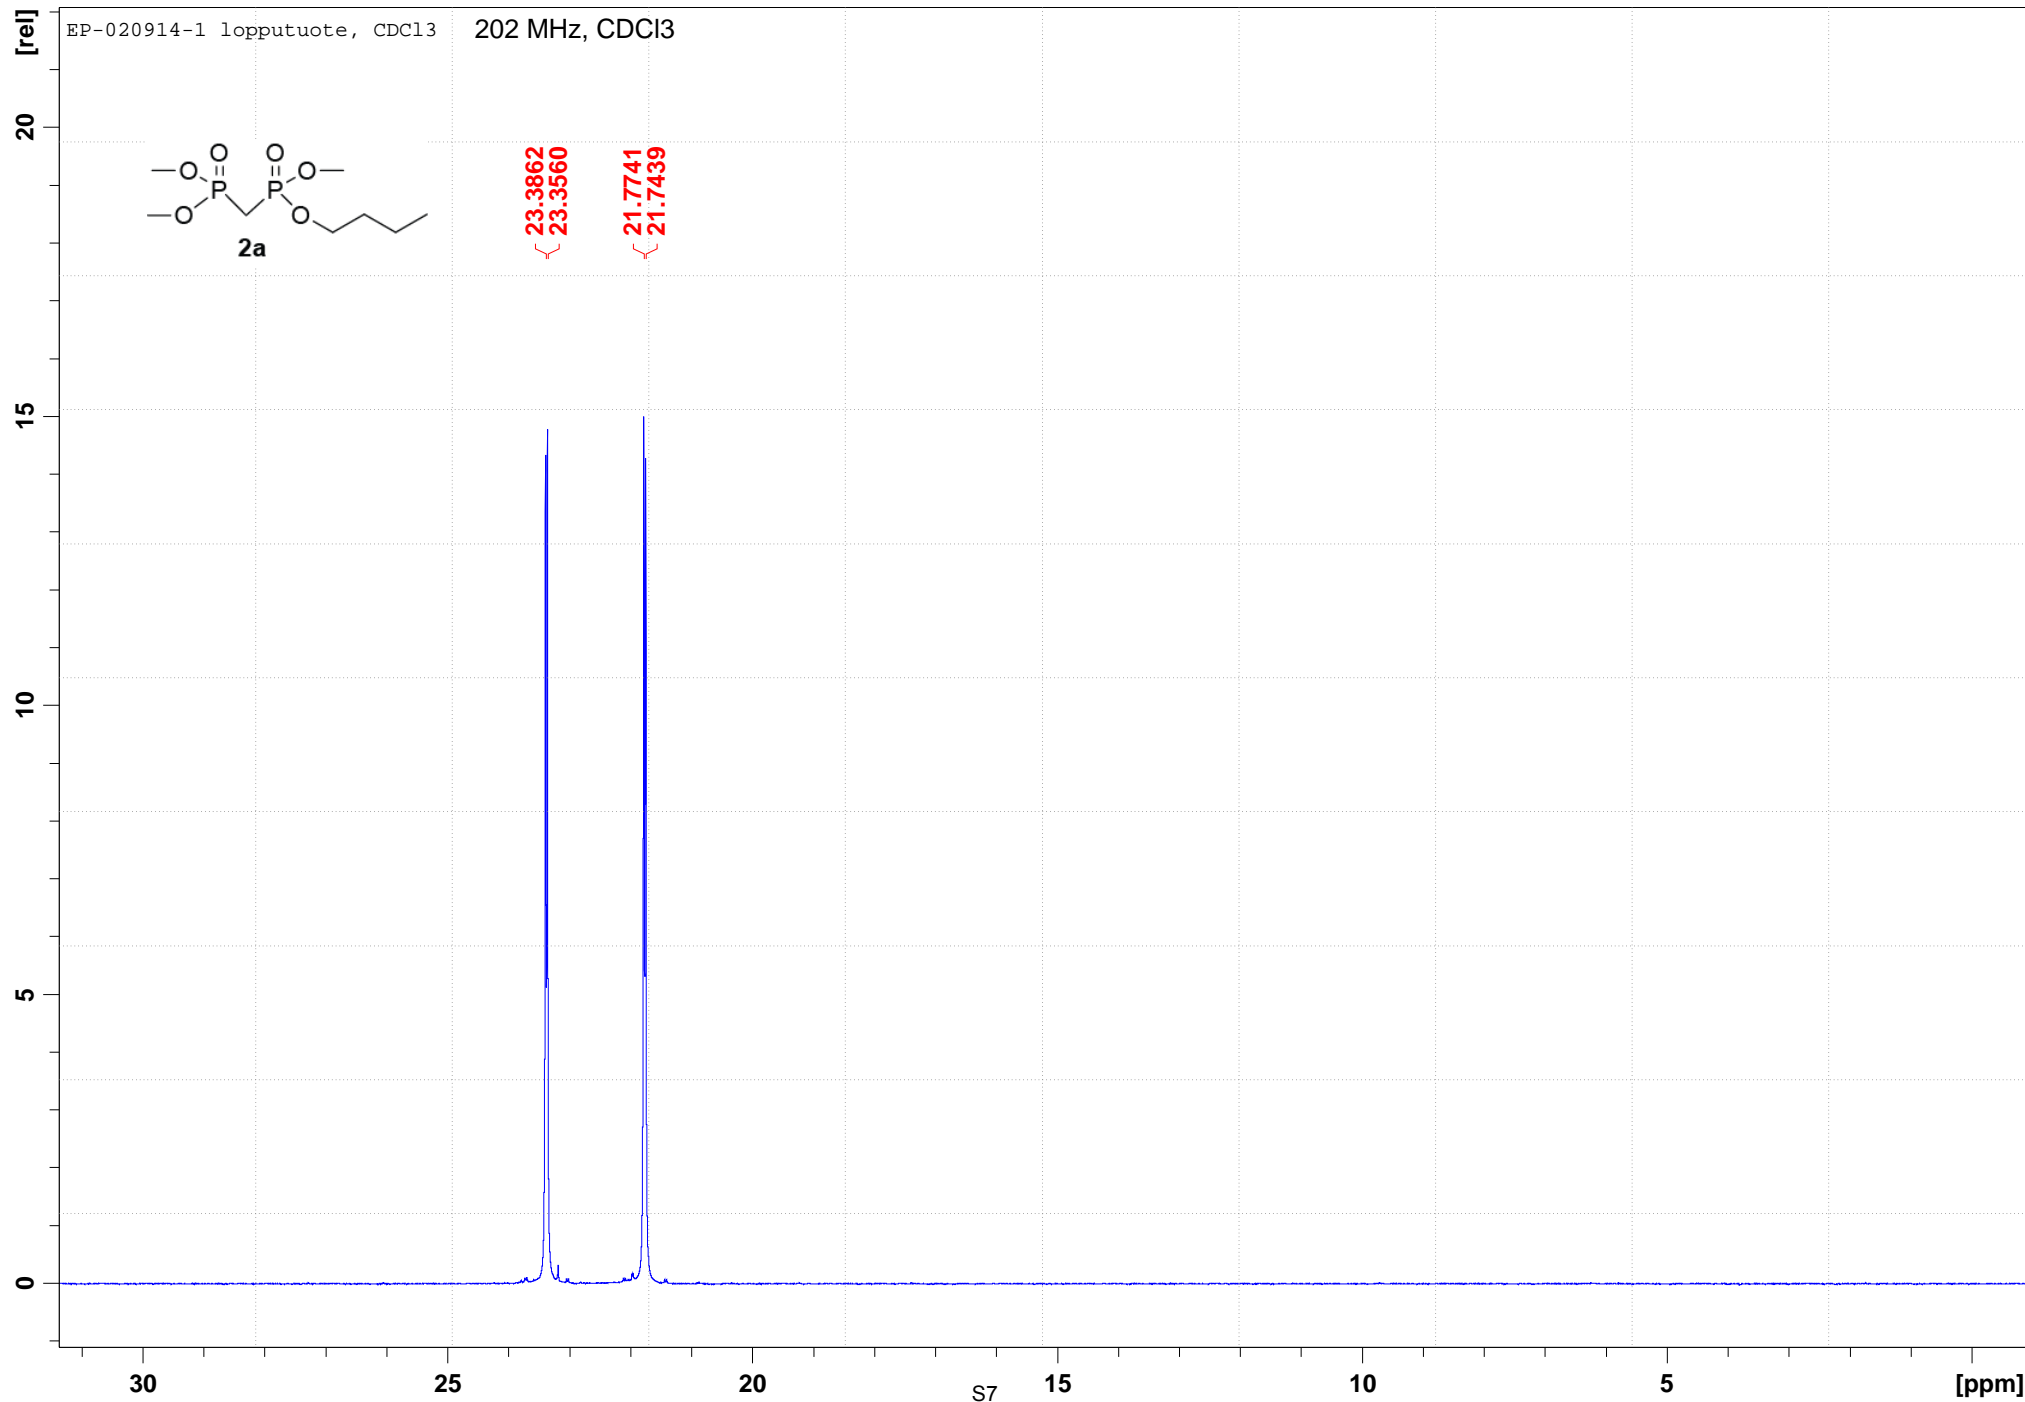

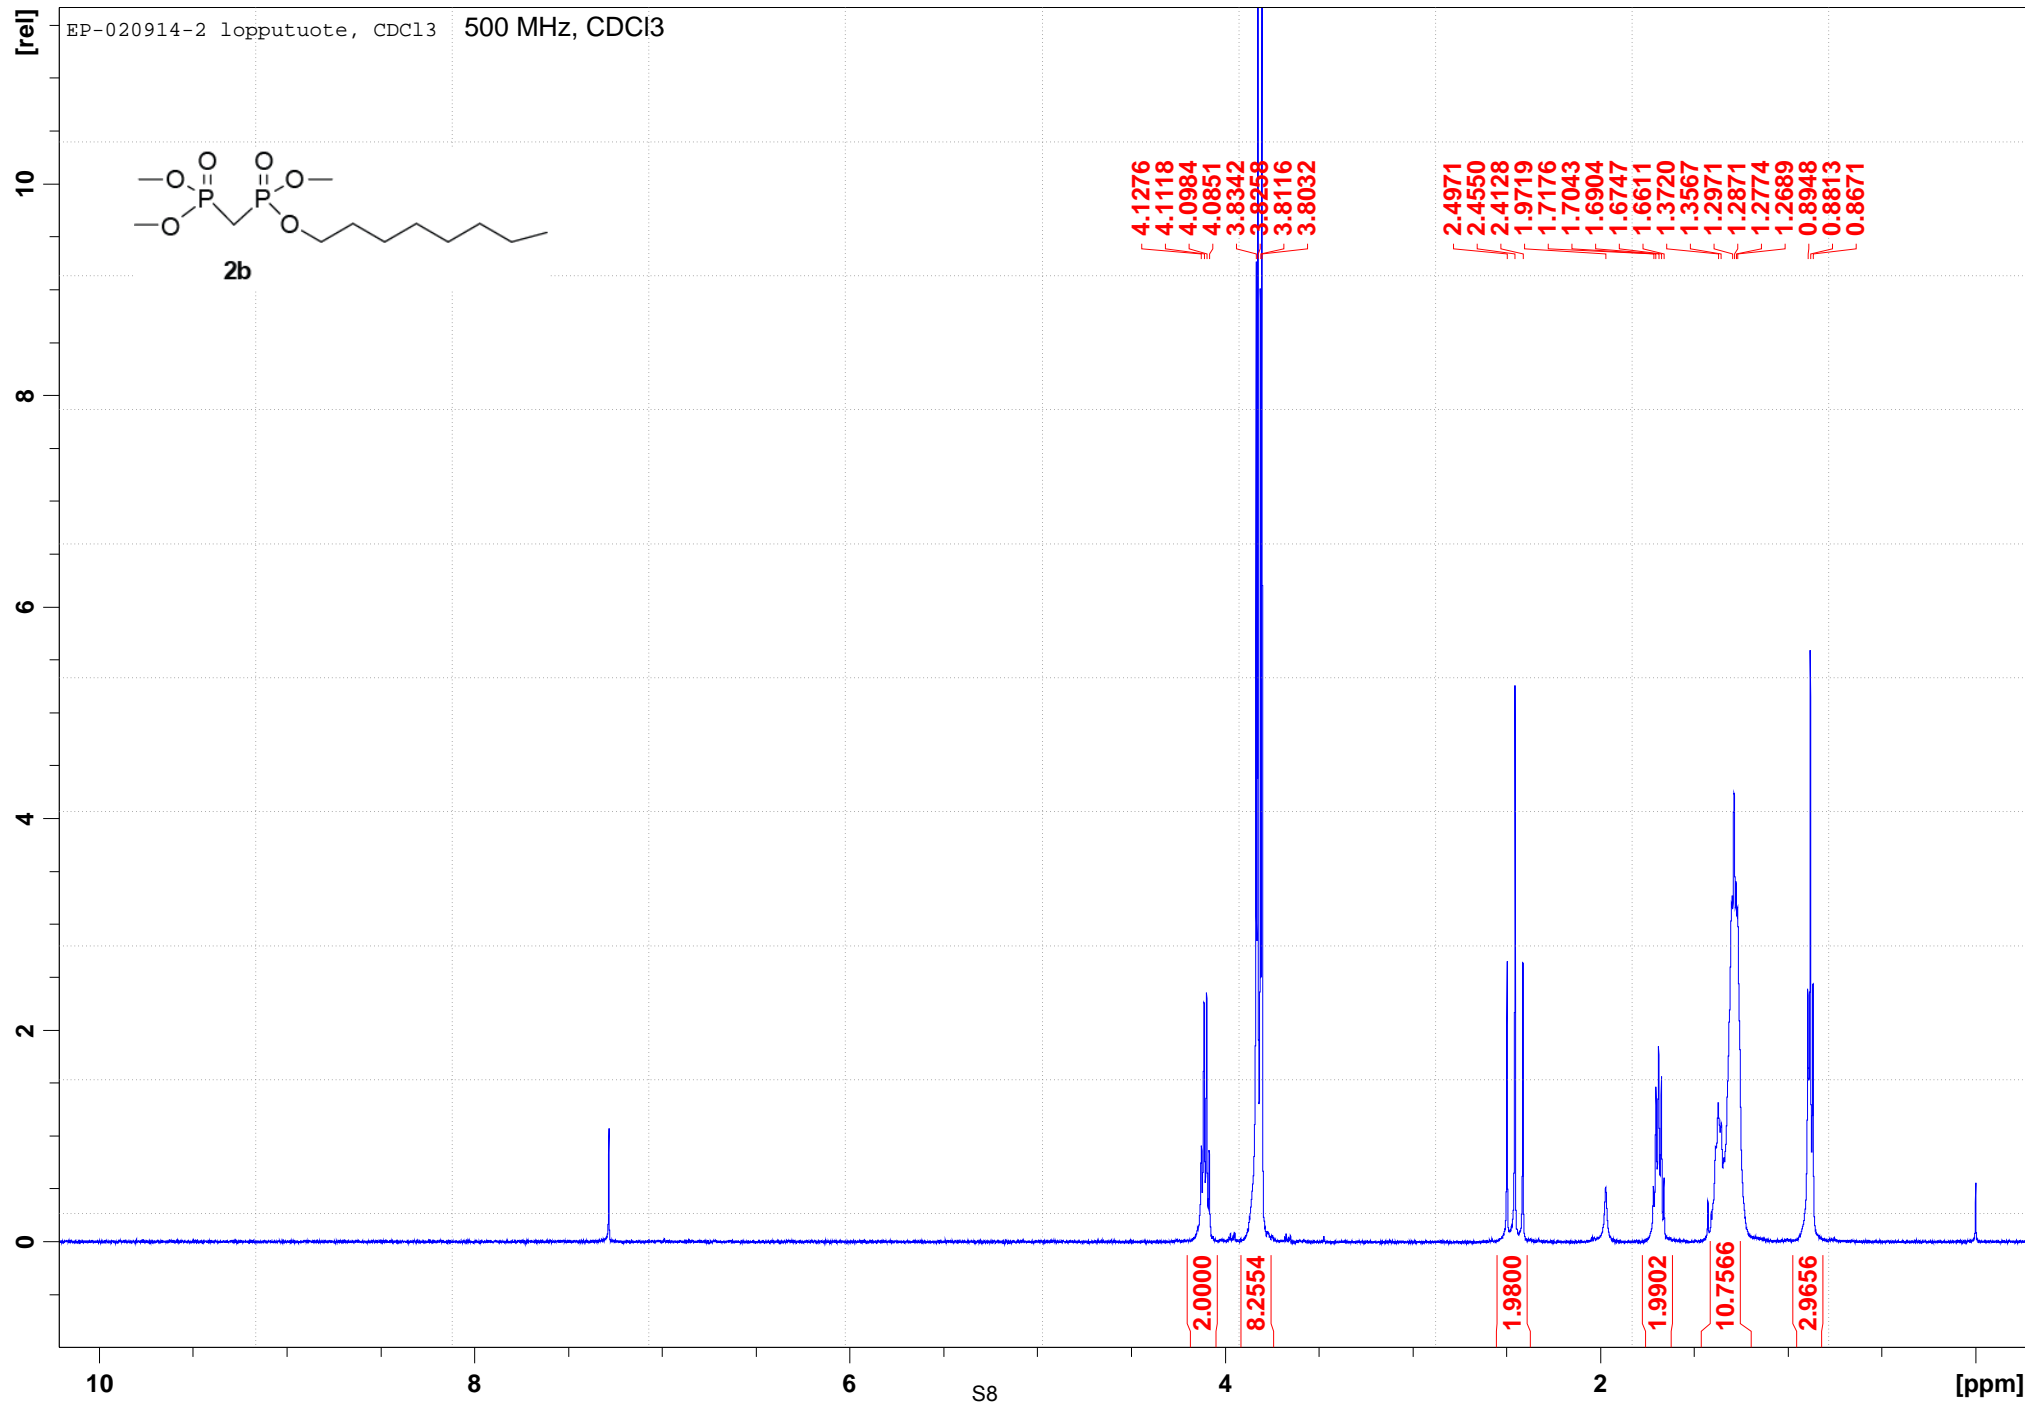



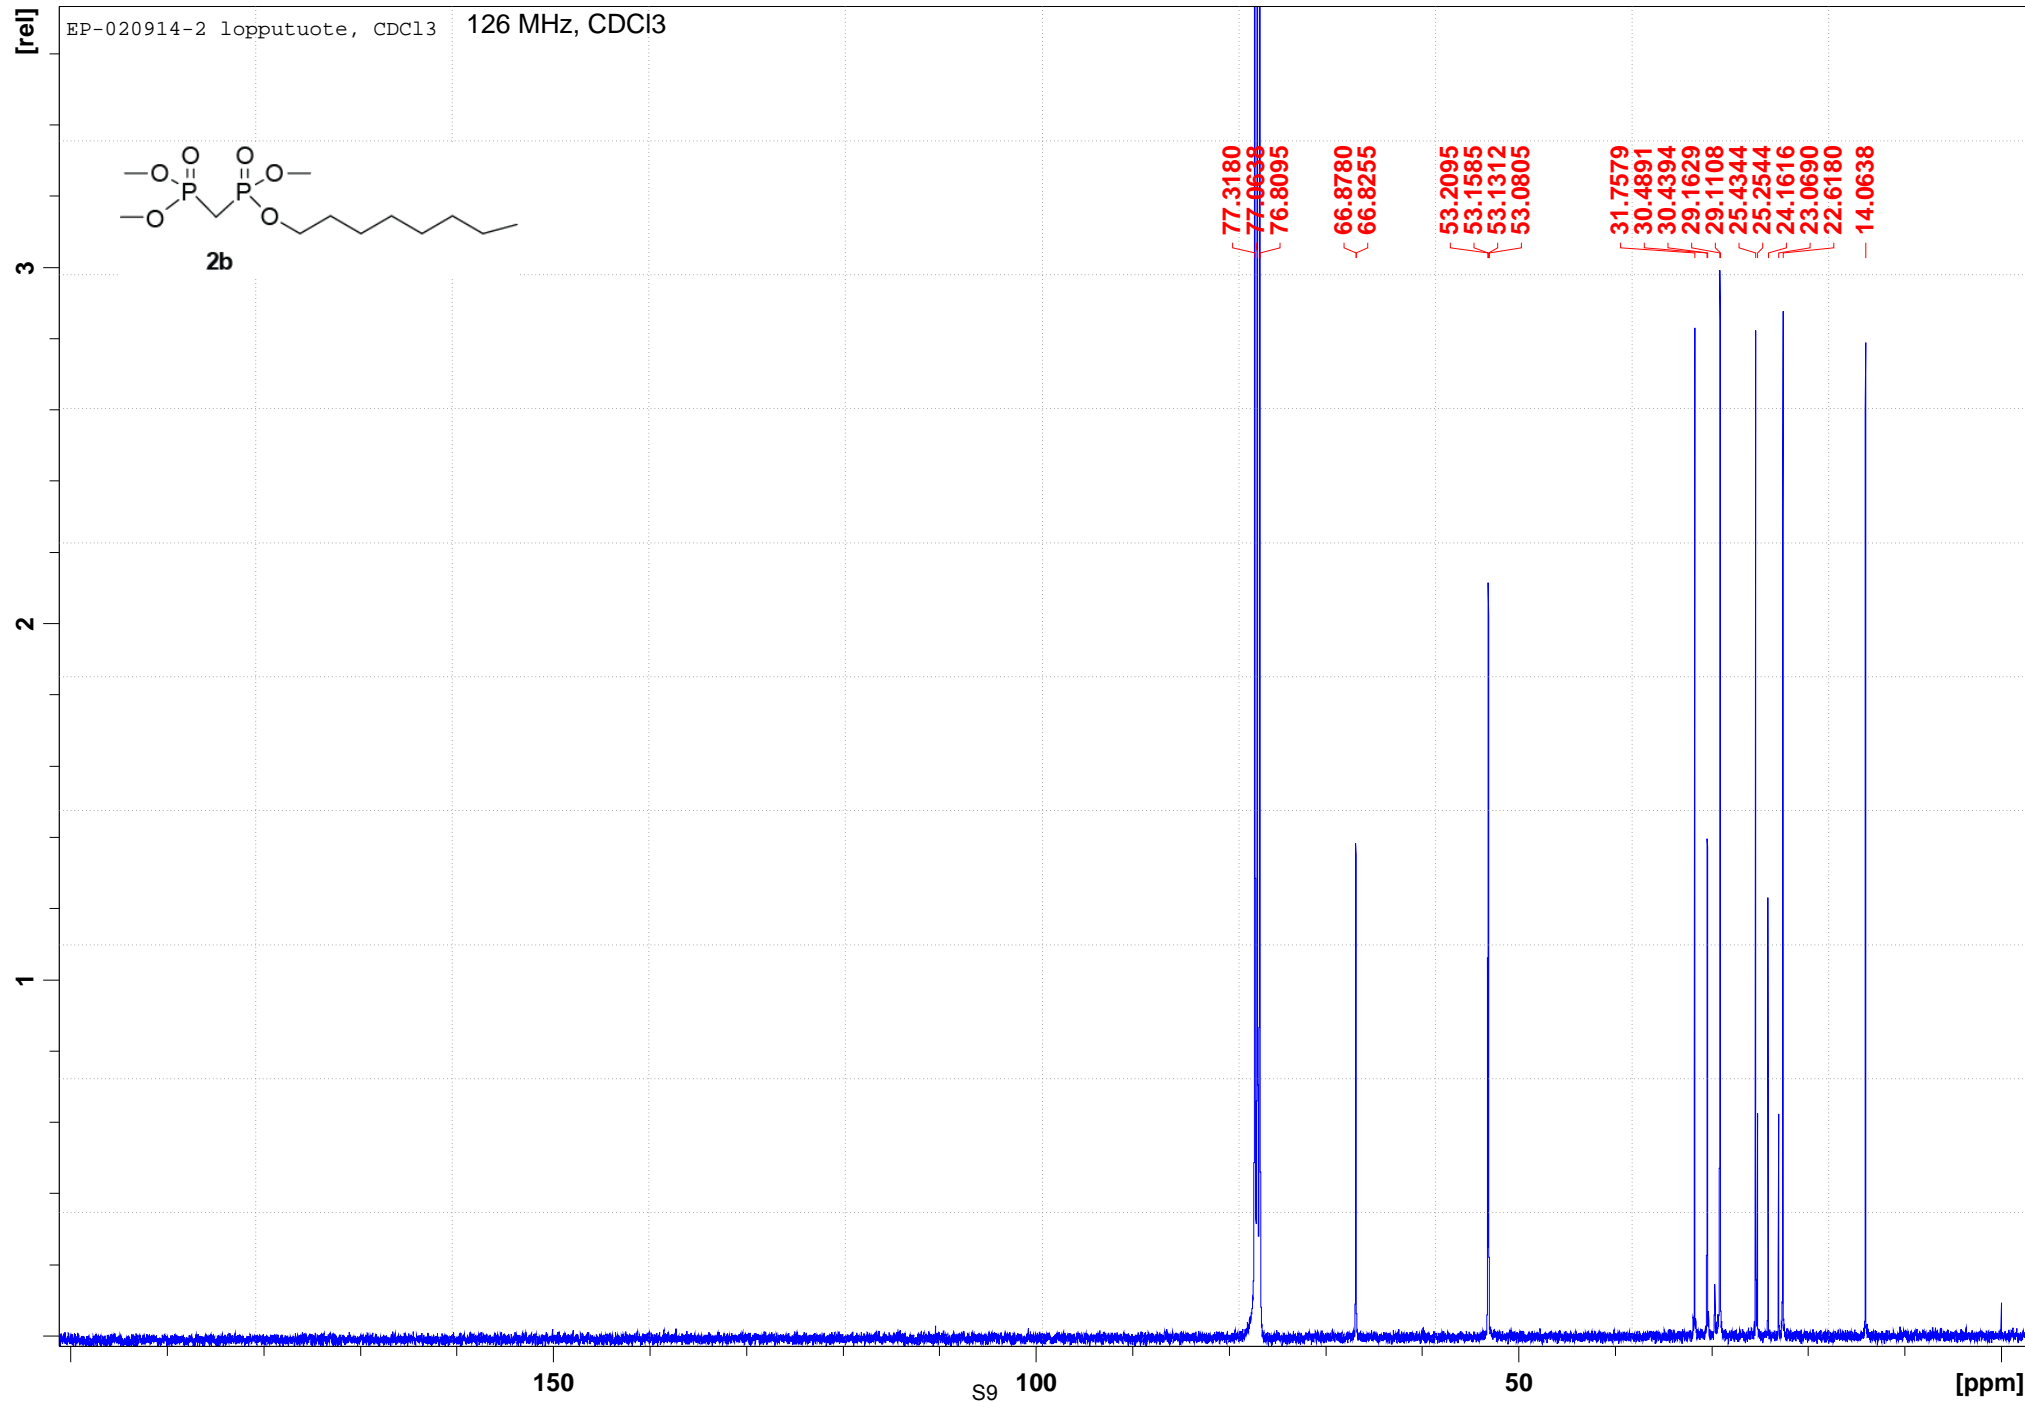

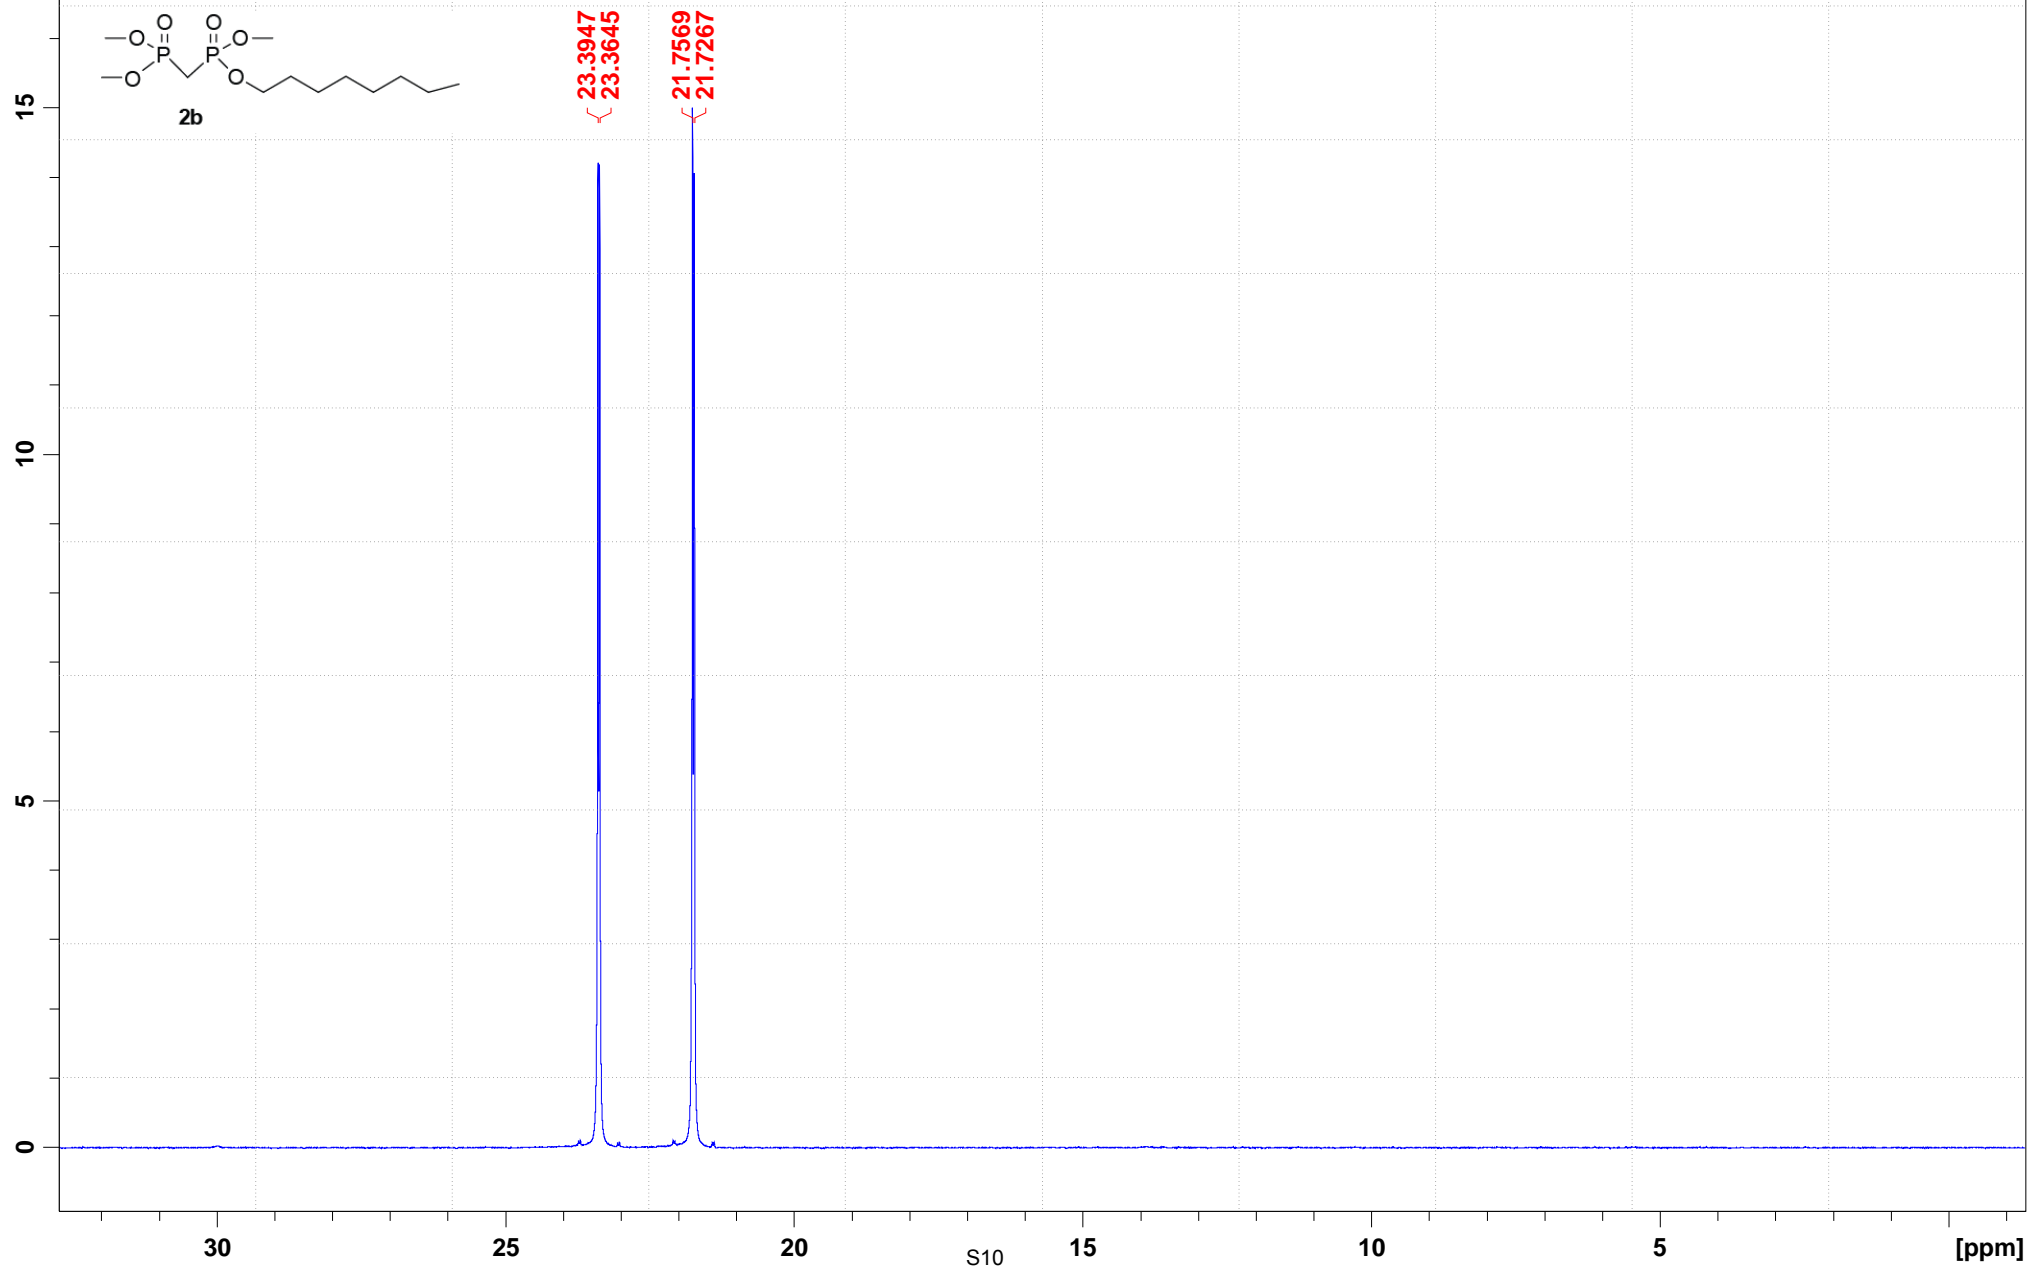

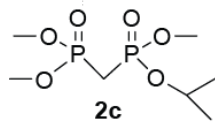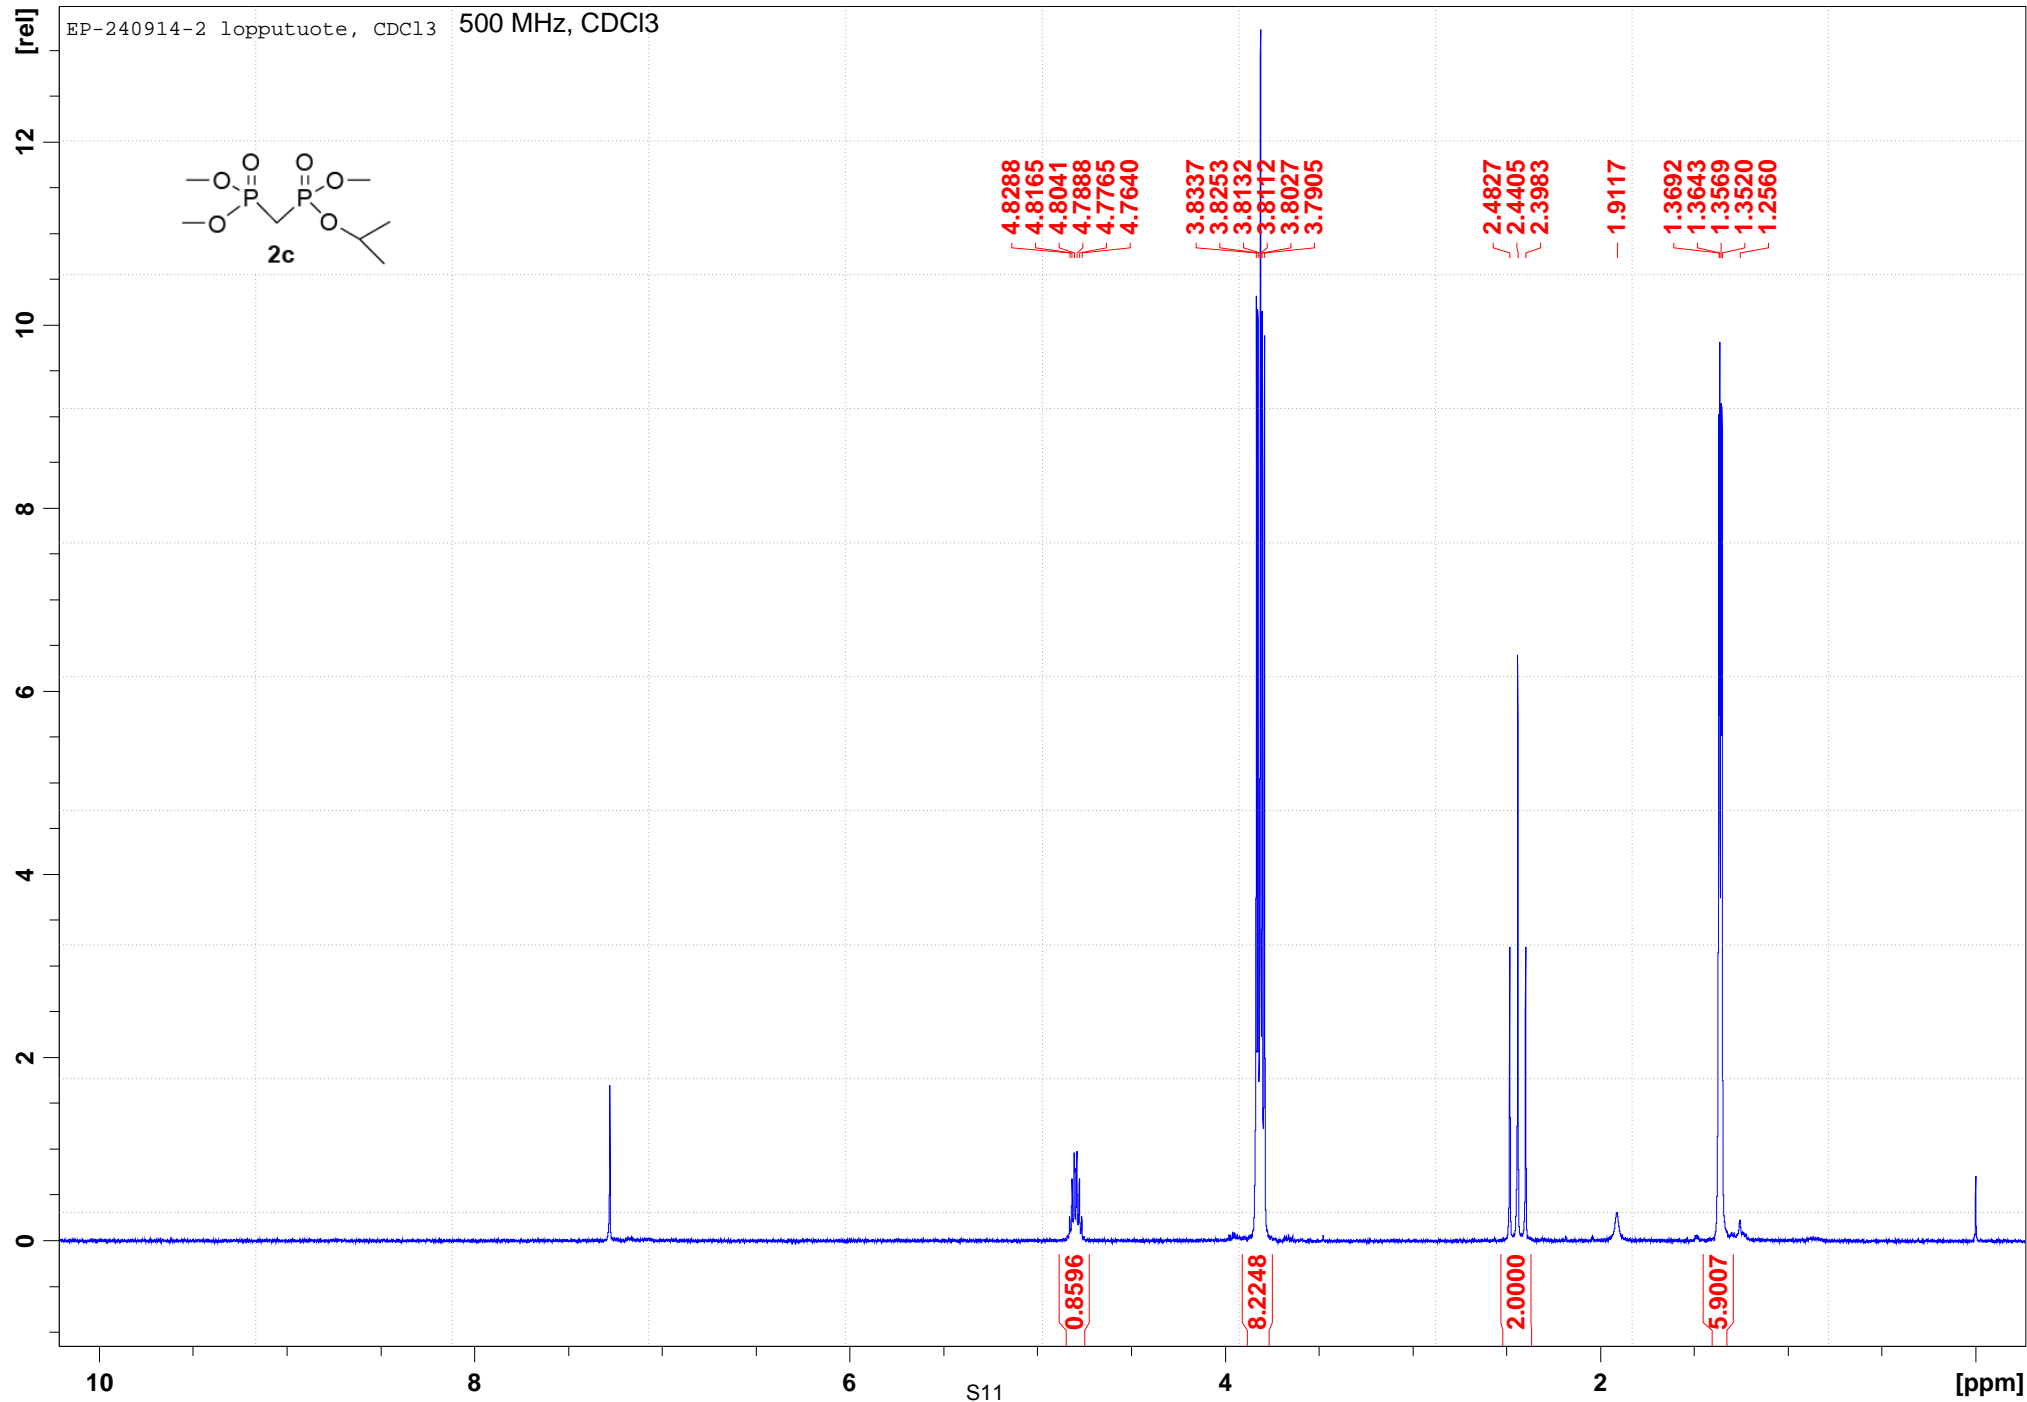

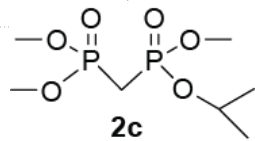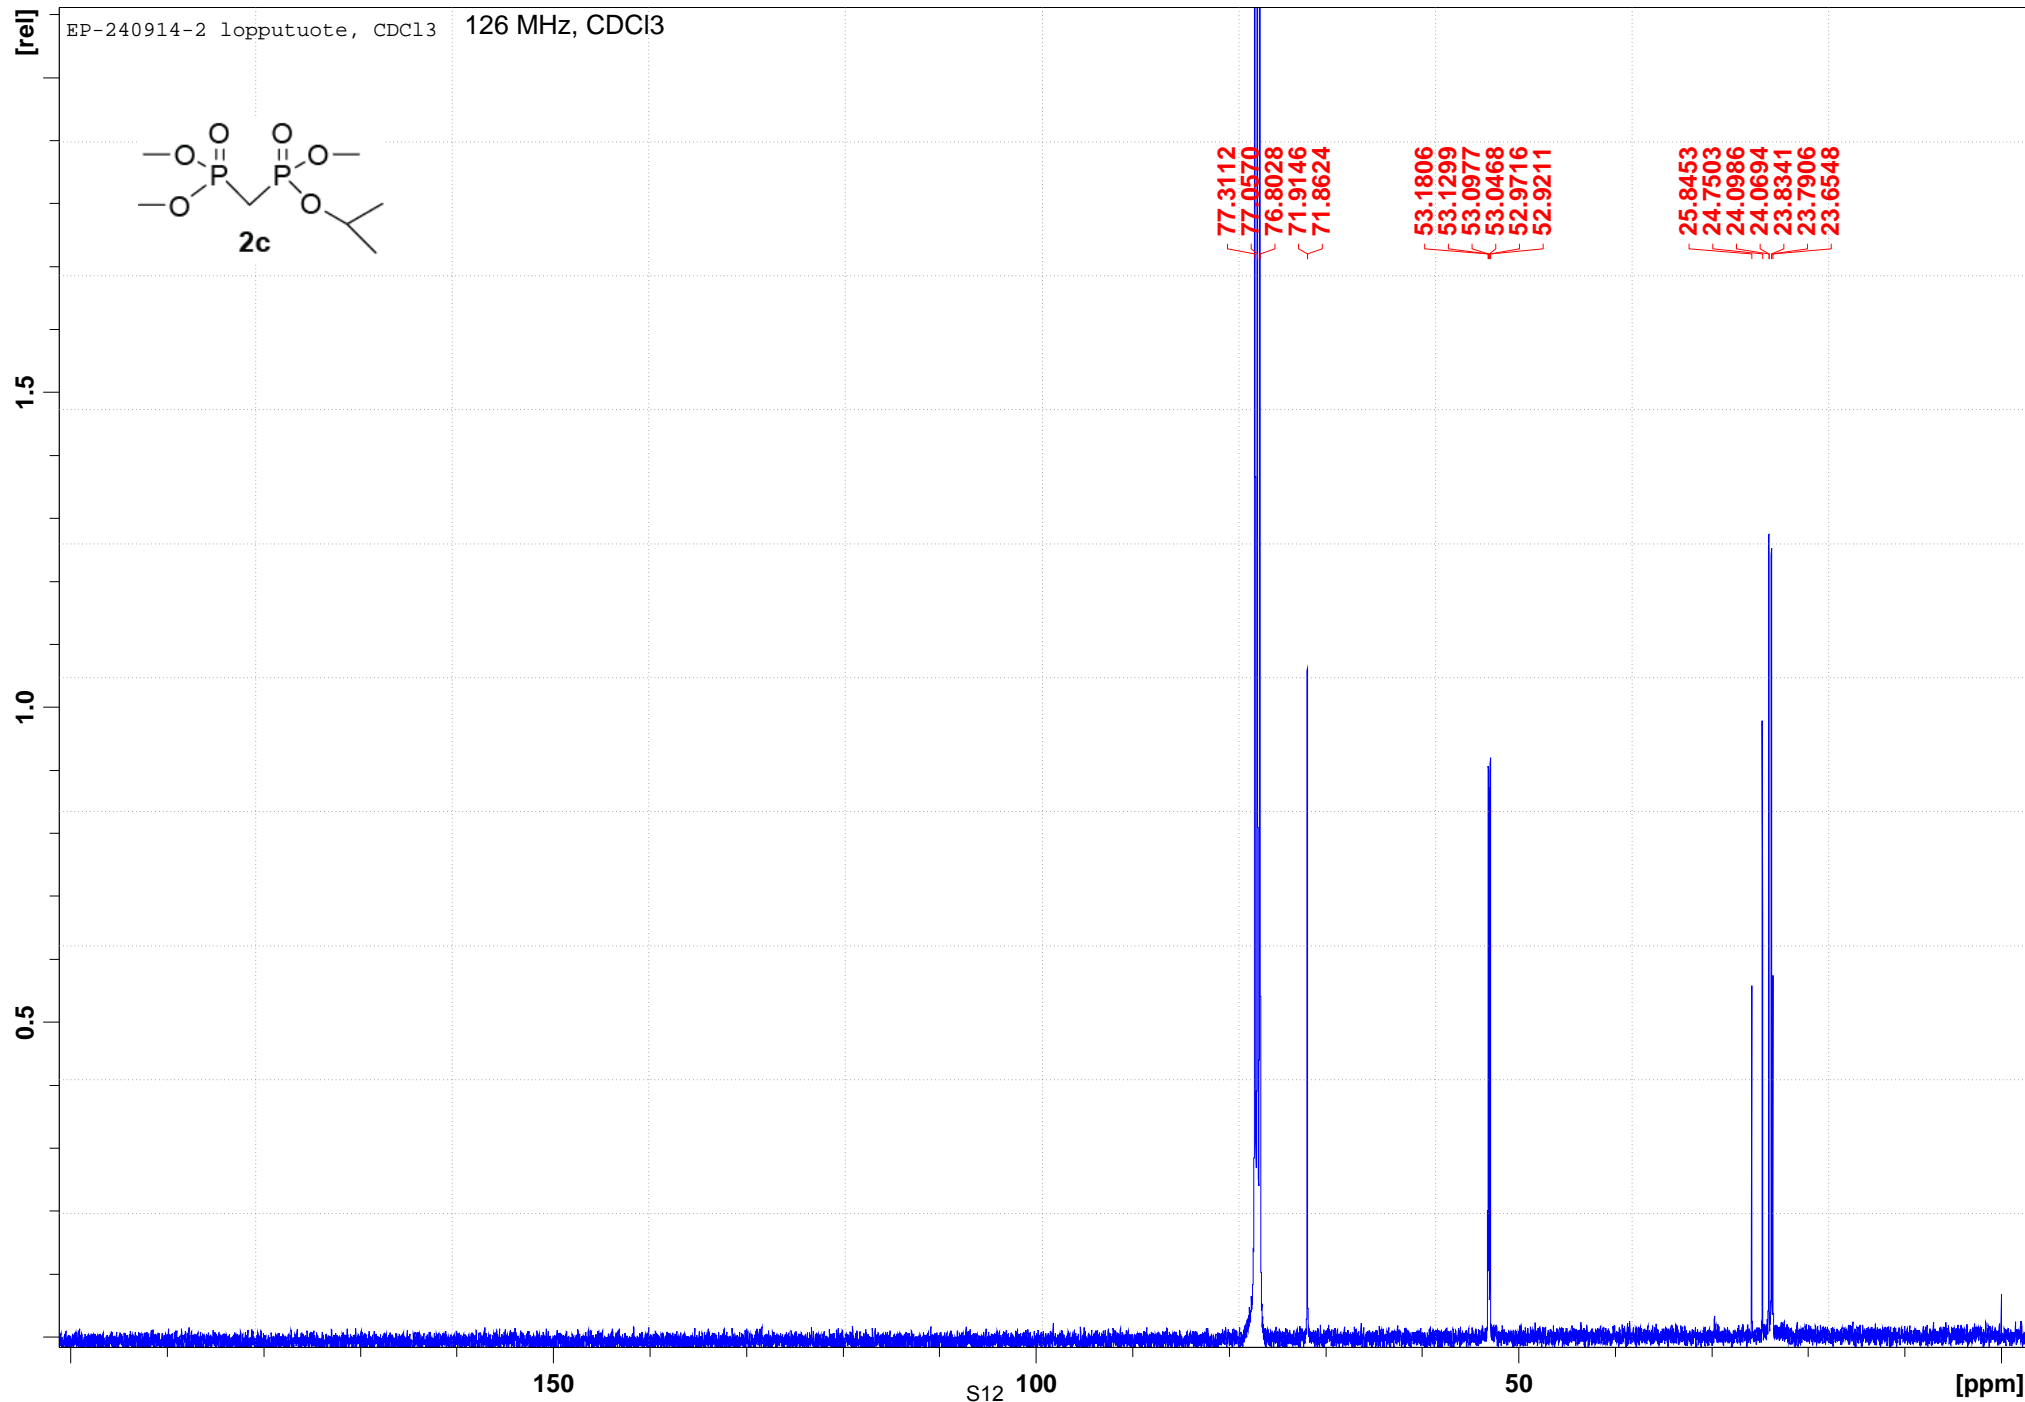

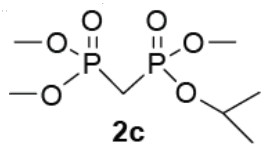

23.4632  
23.4322

20.6869  
20.6558

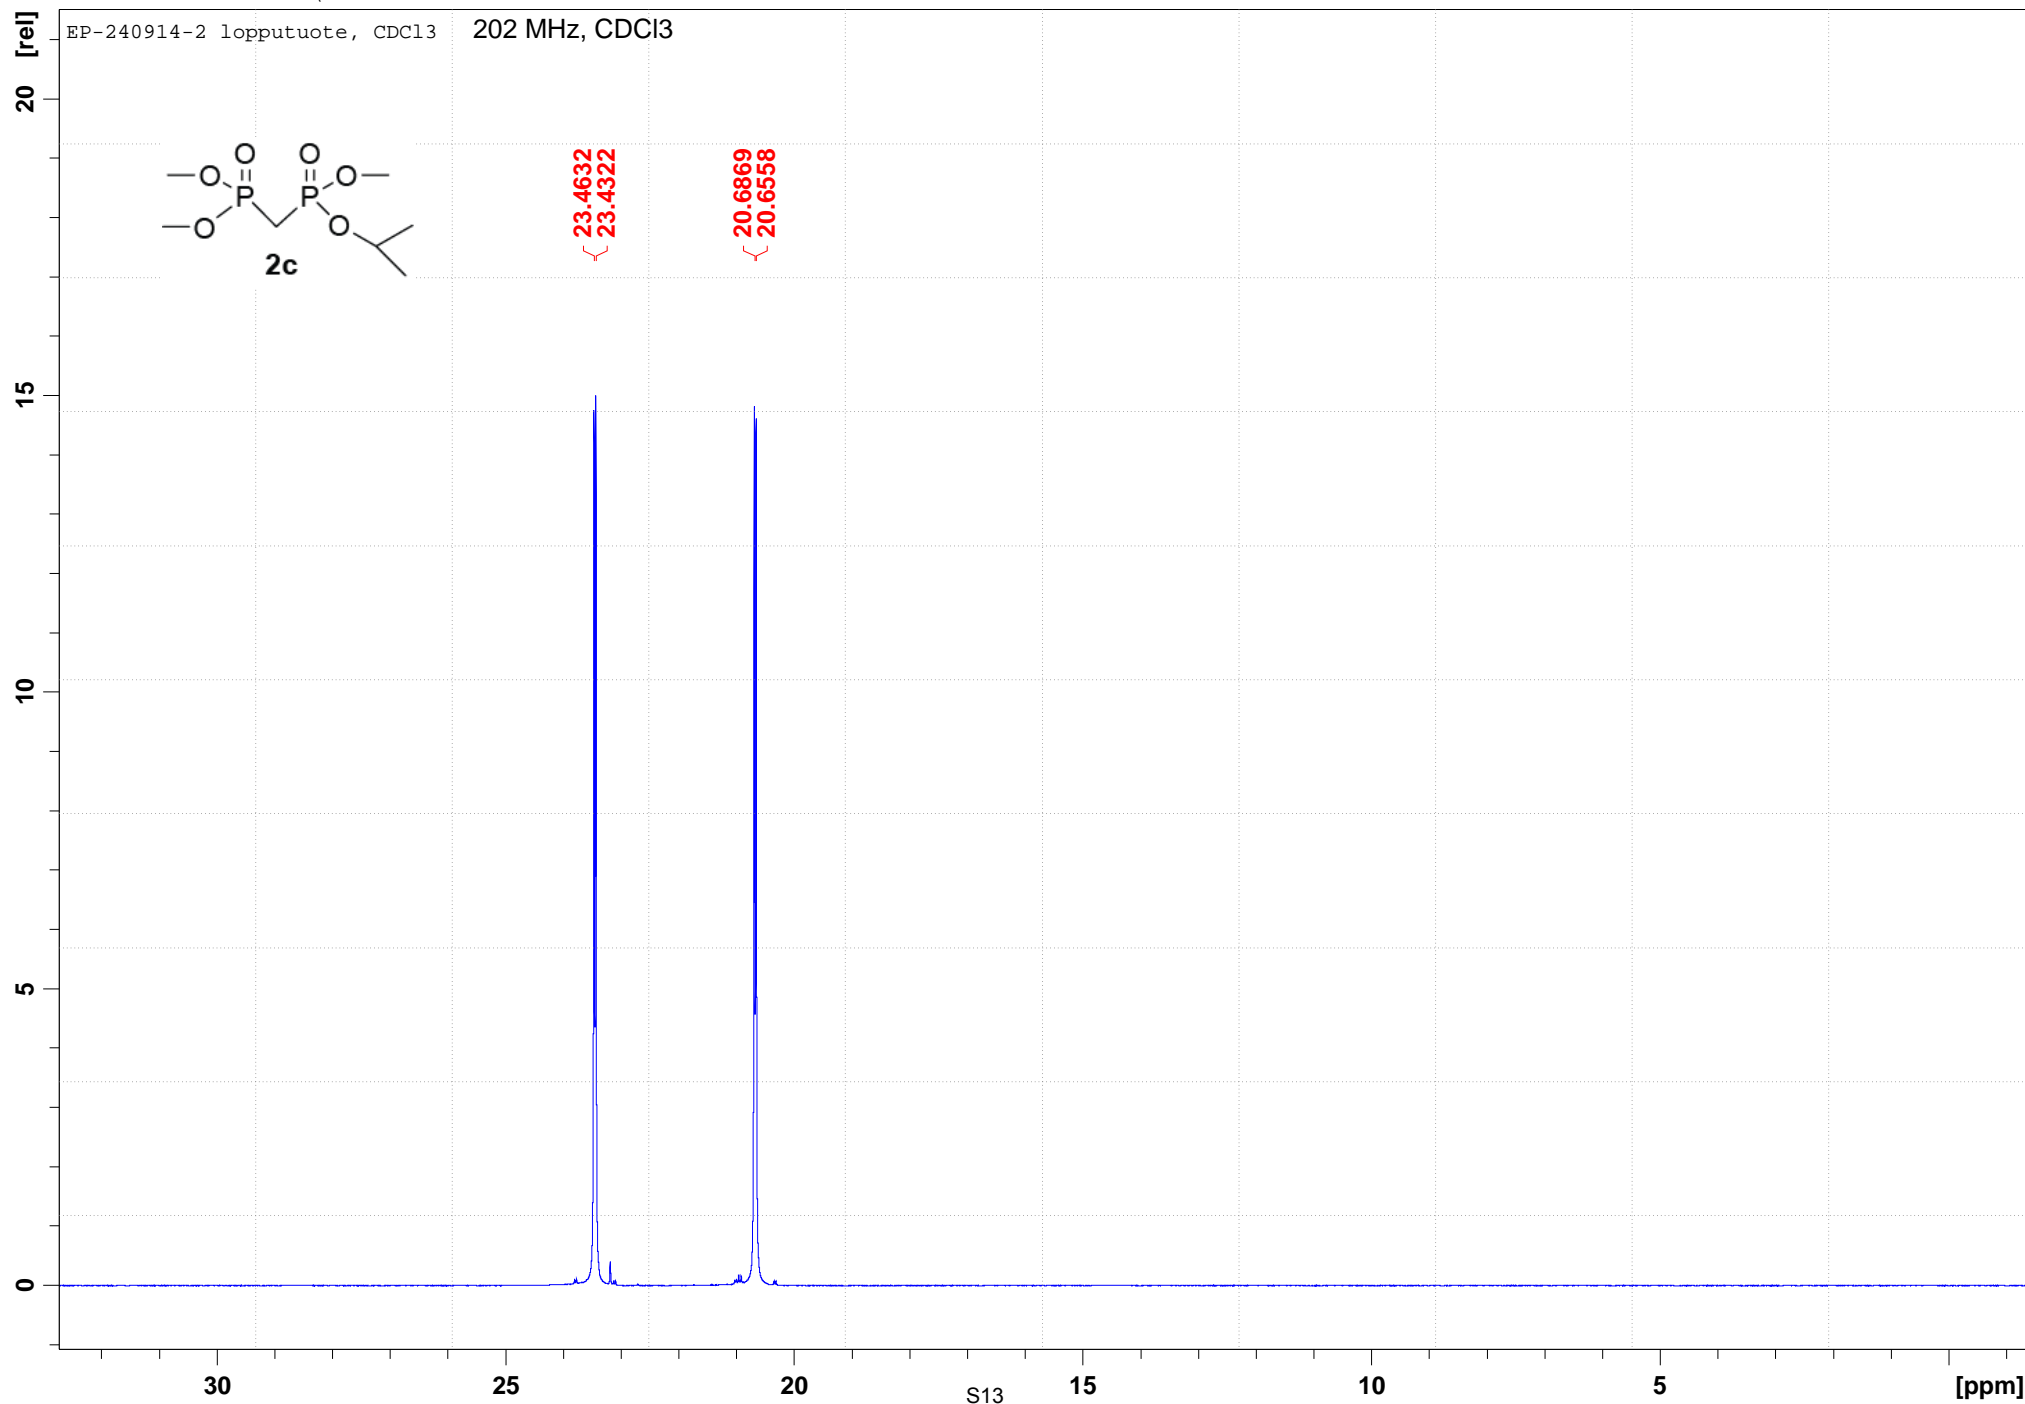

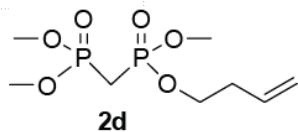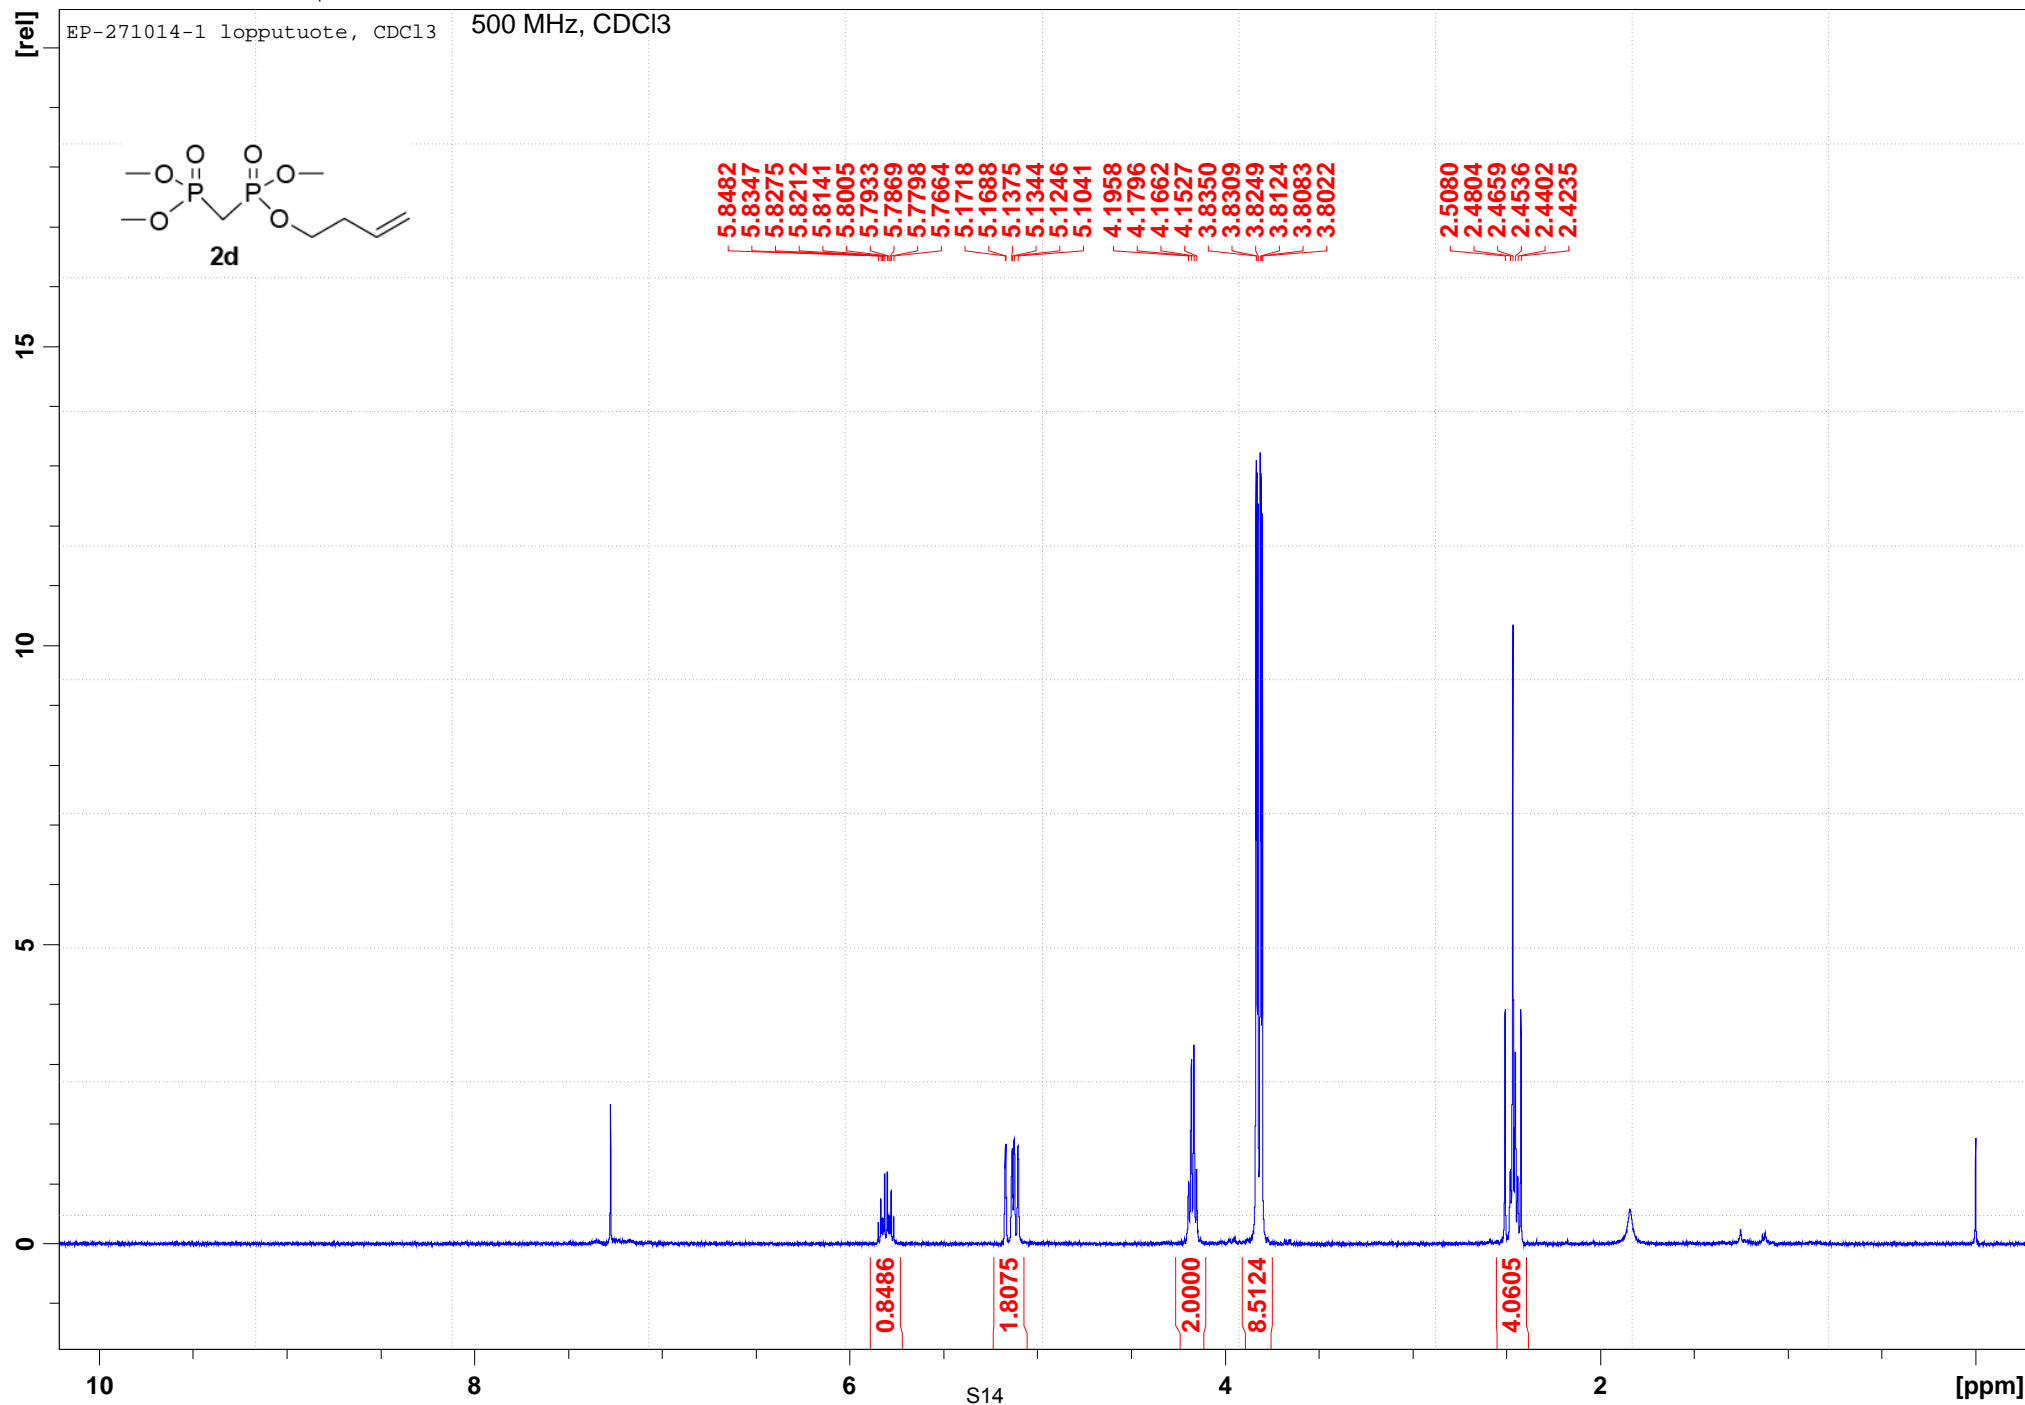

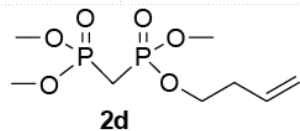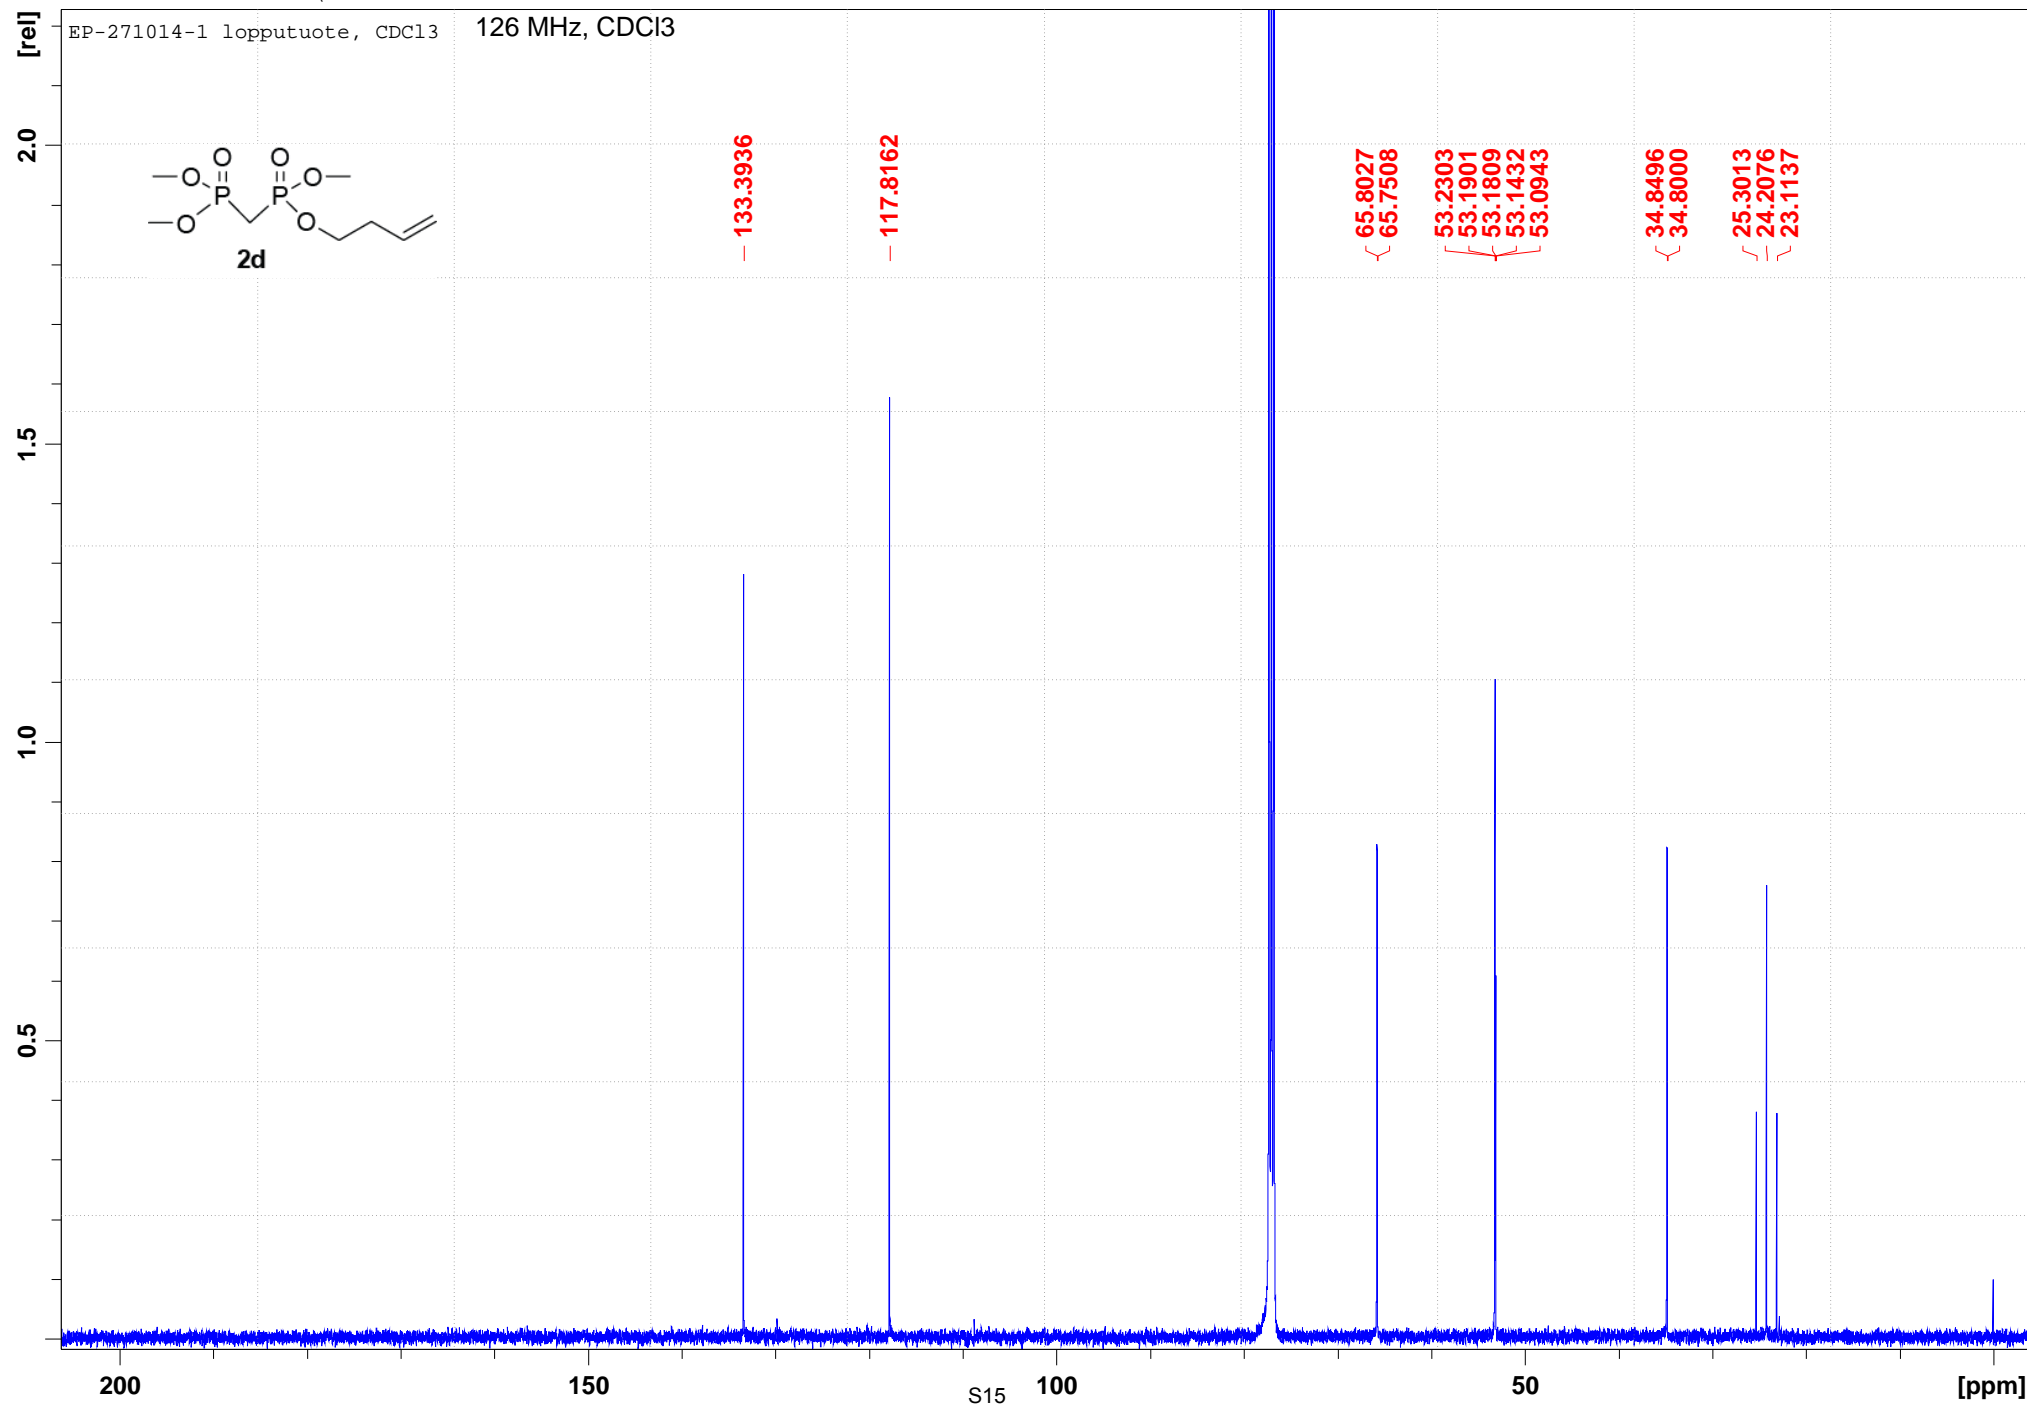

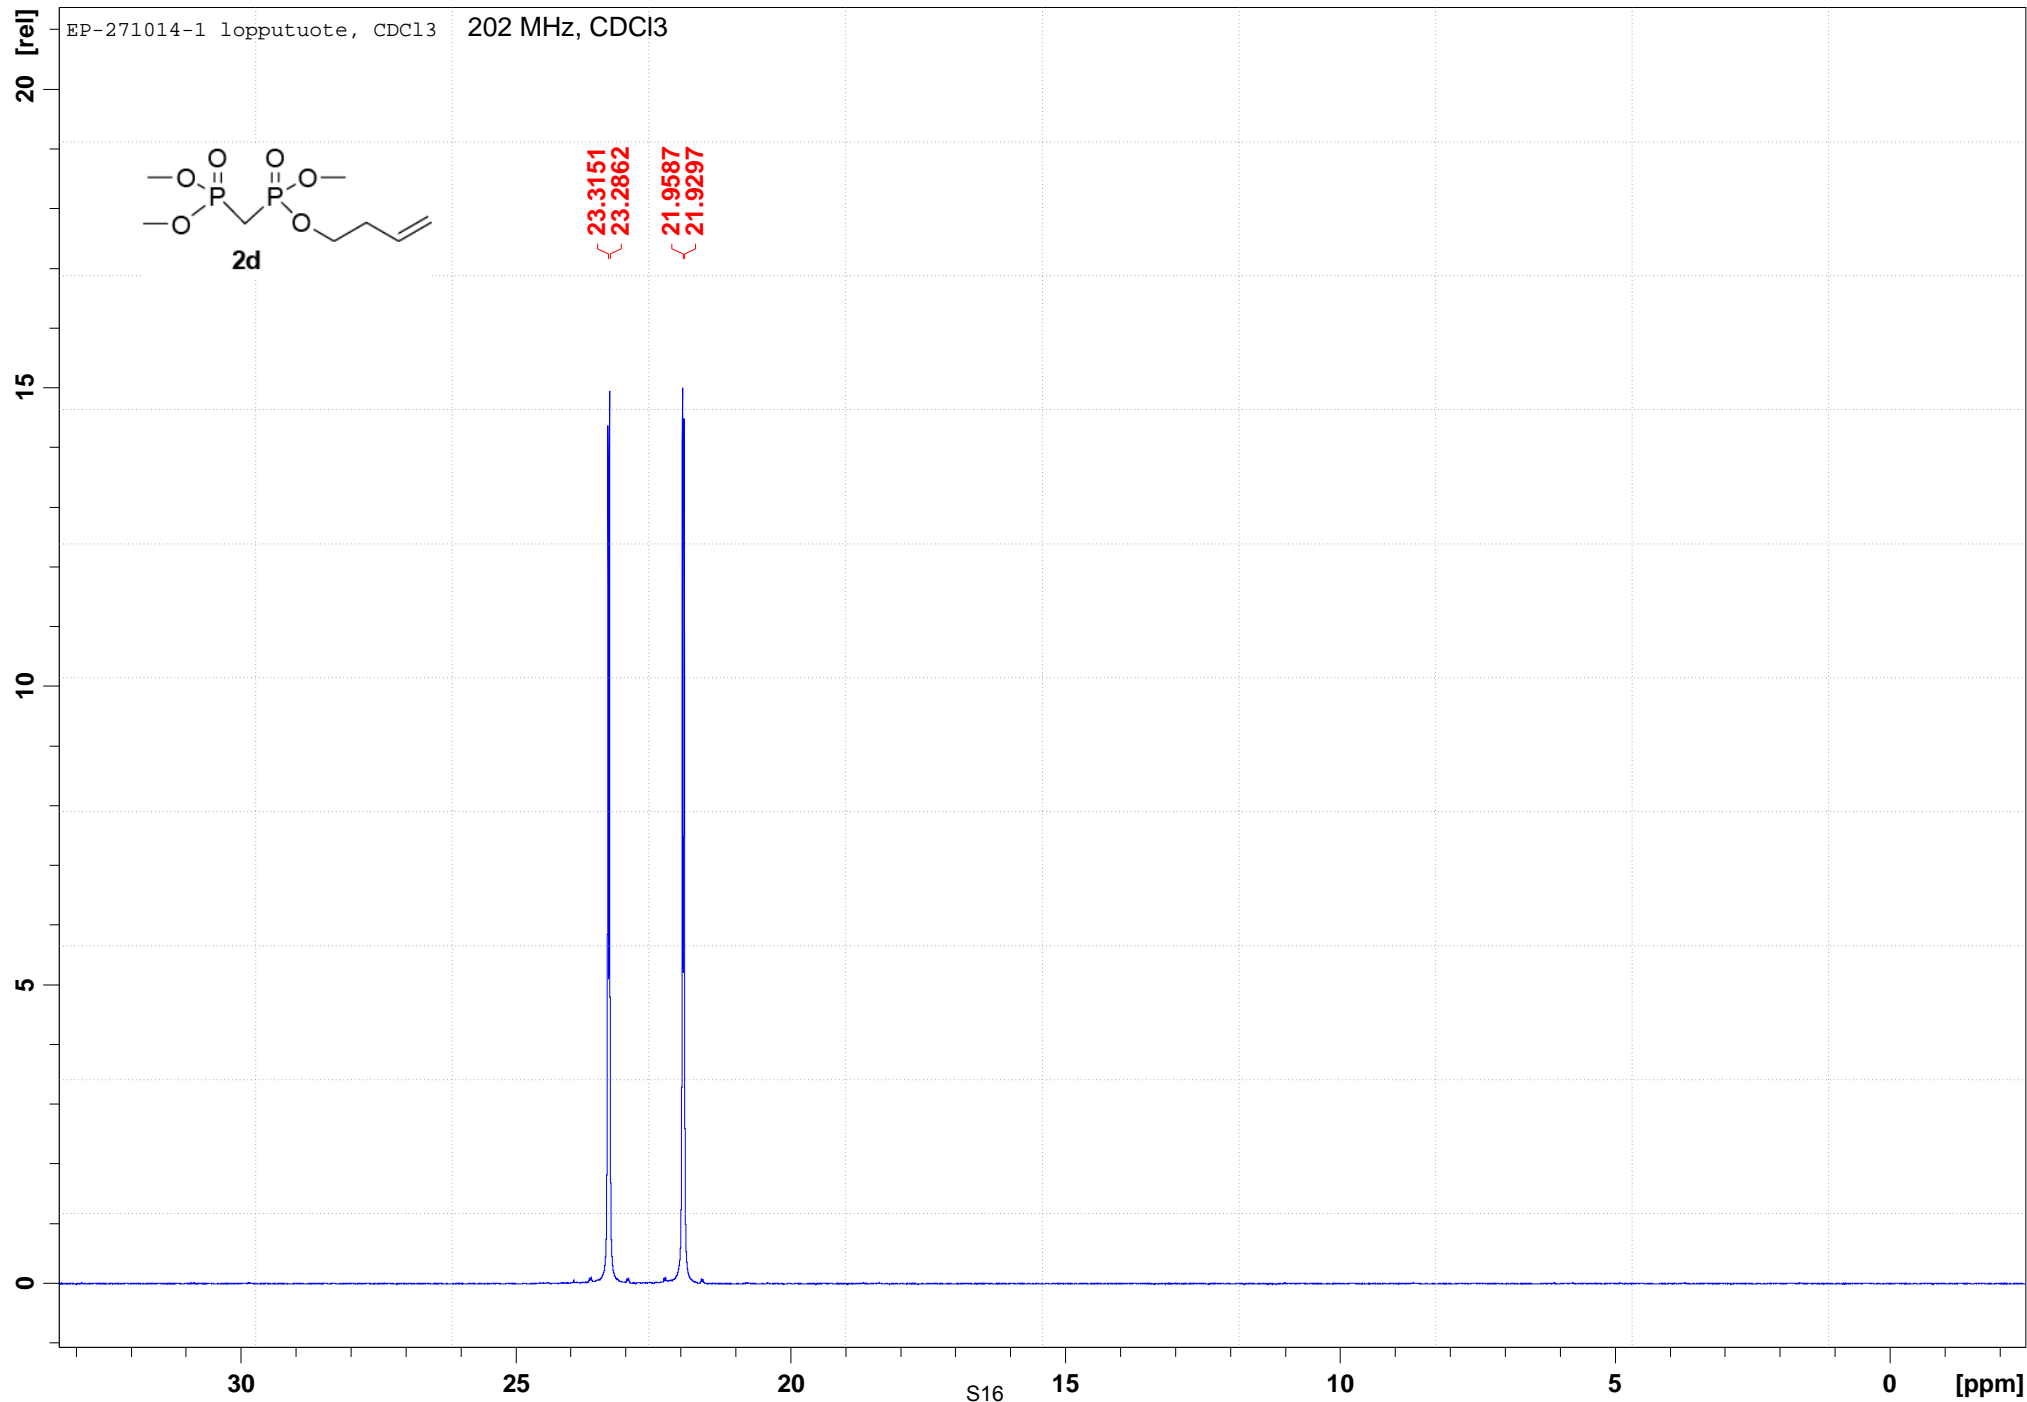



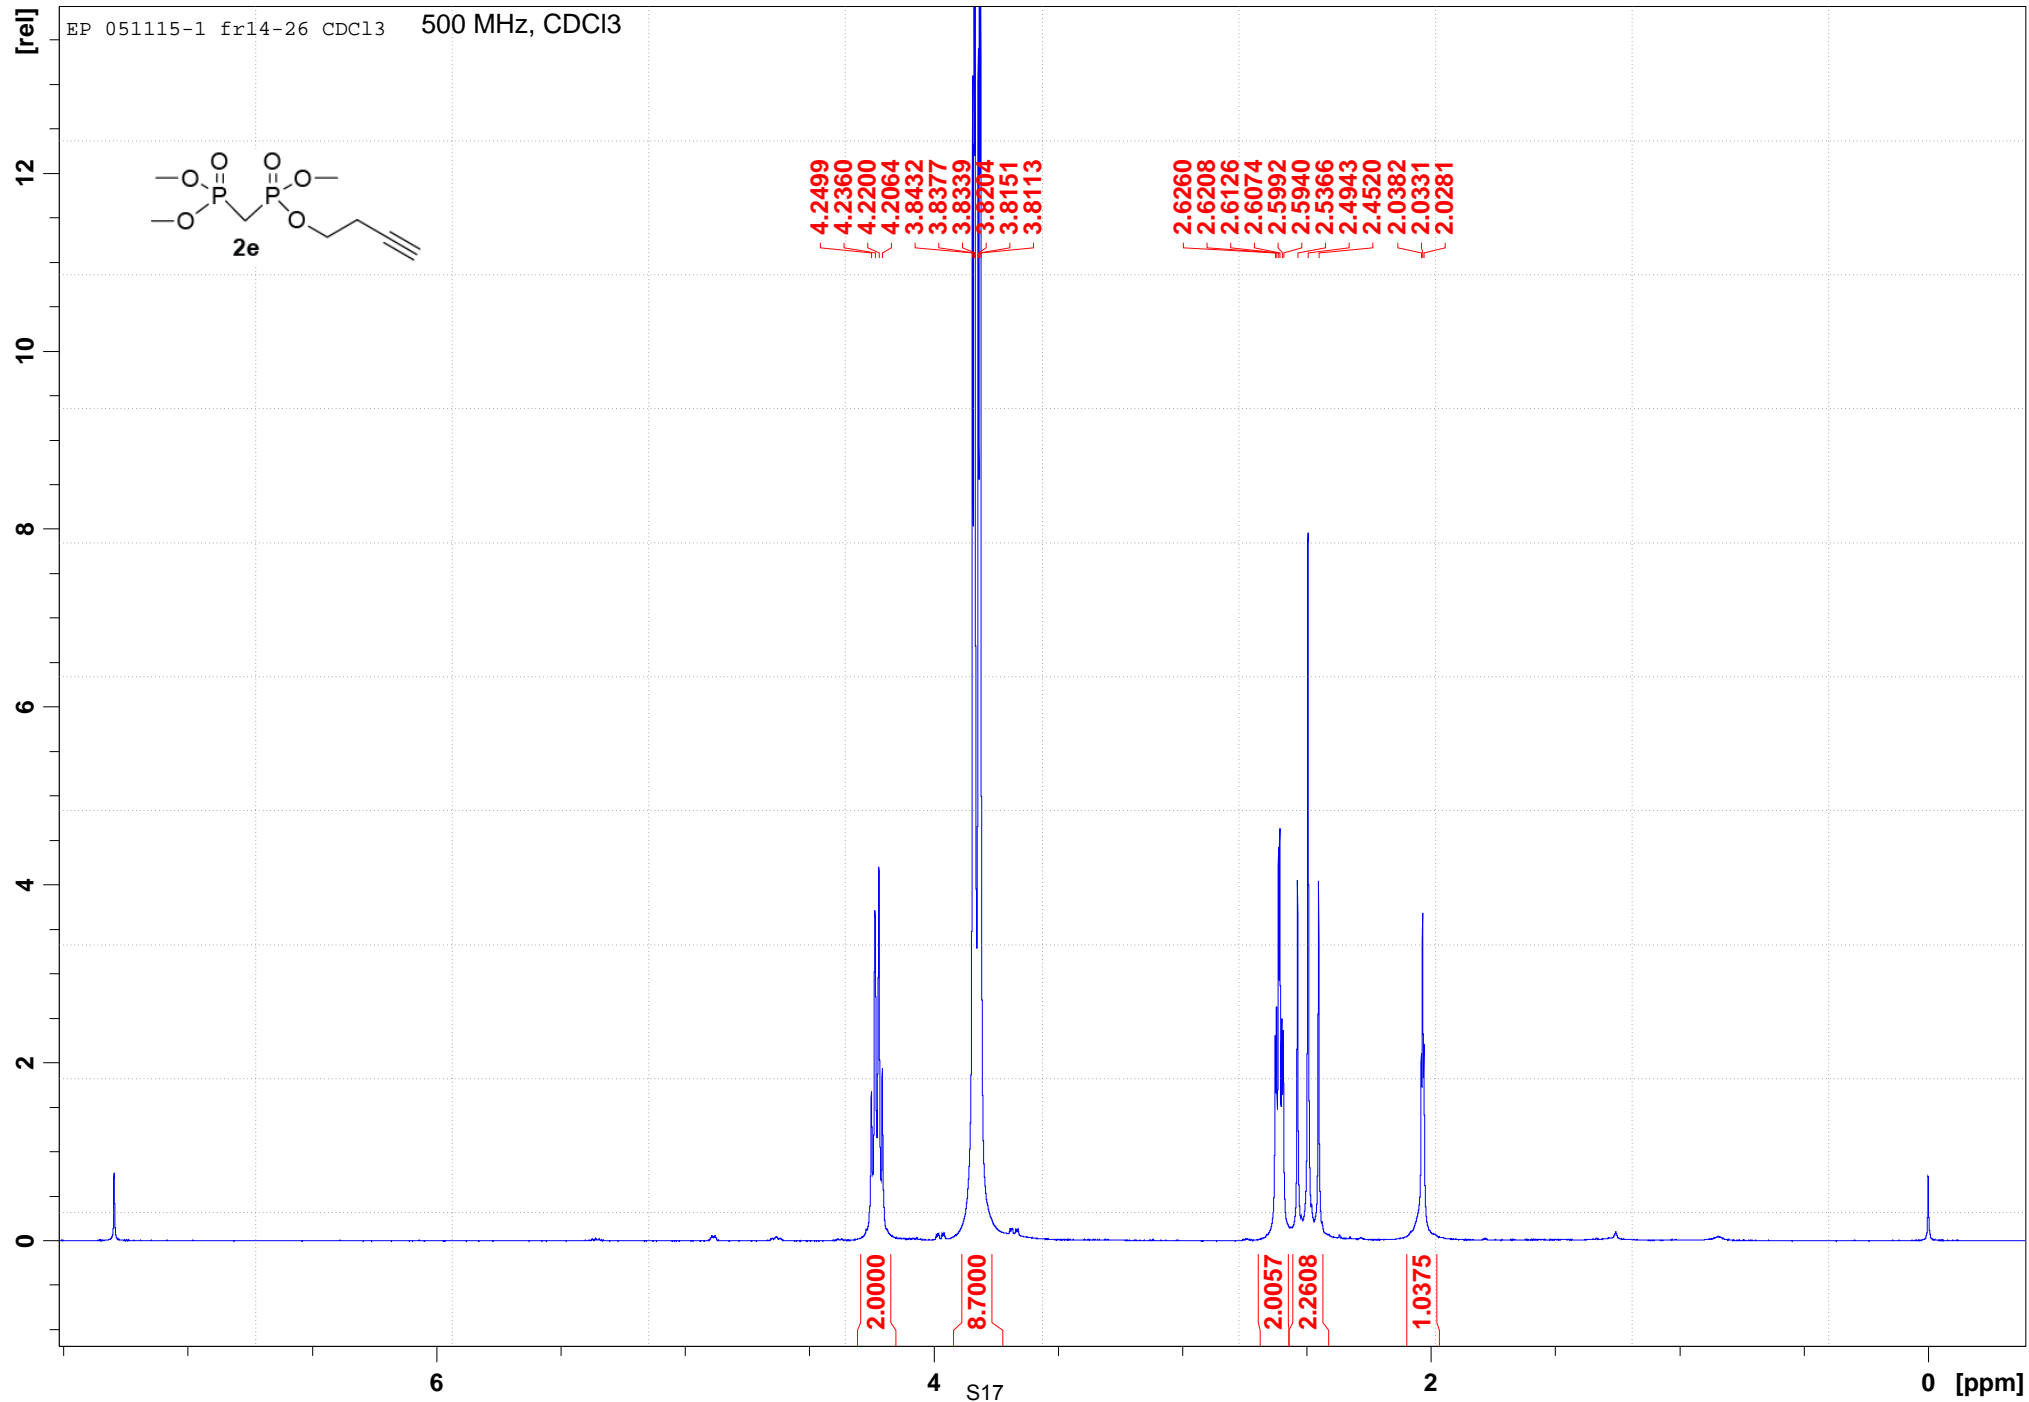

6

4 S17

2

0 [ppm]

"141027-2 esteri" 55 1 "E:\NMR 2015"

EP 051115-1 fr14-26 CDCl3 126 MHz, CDCl3

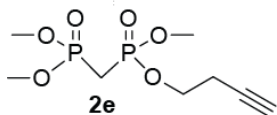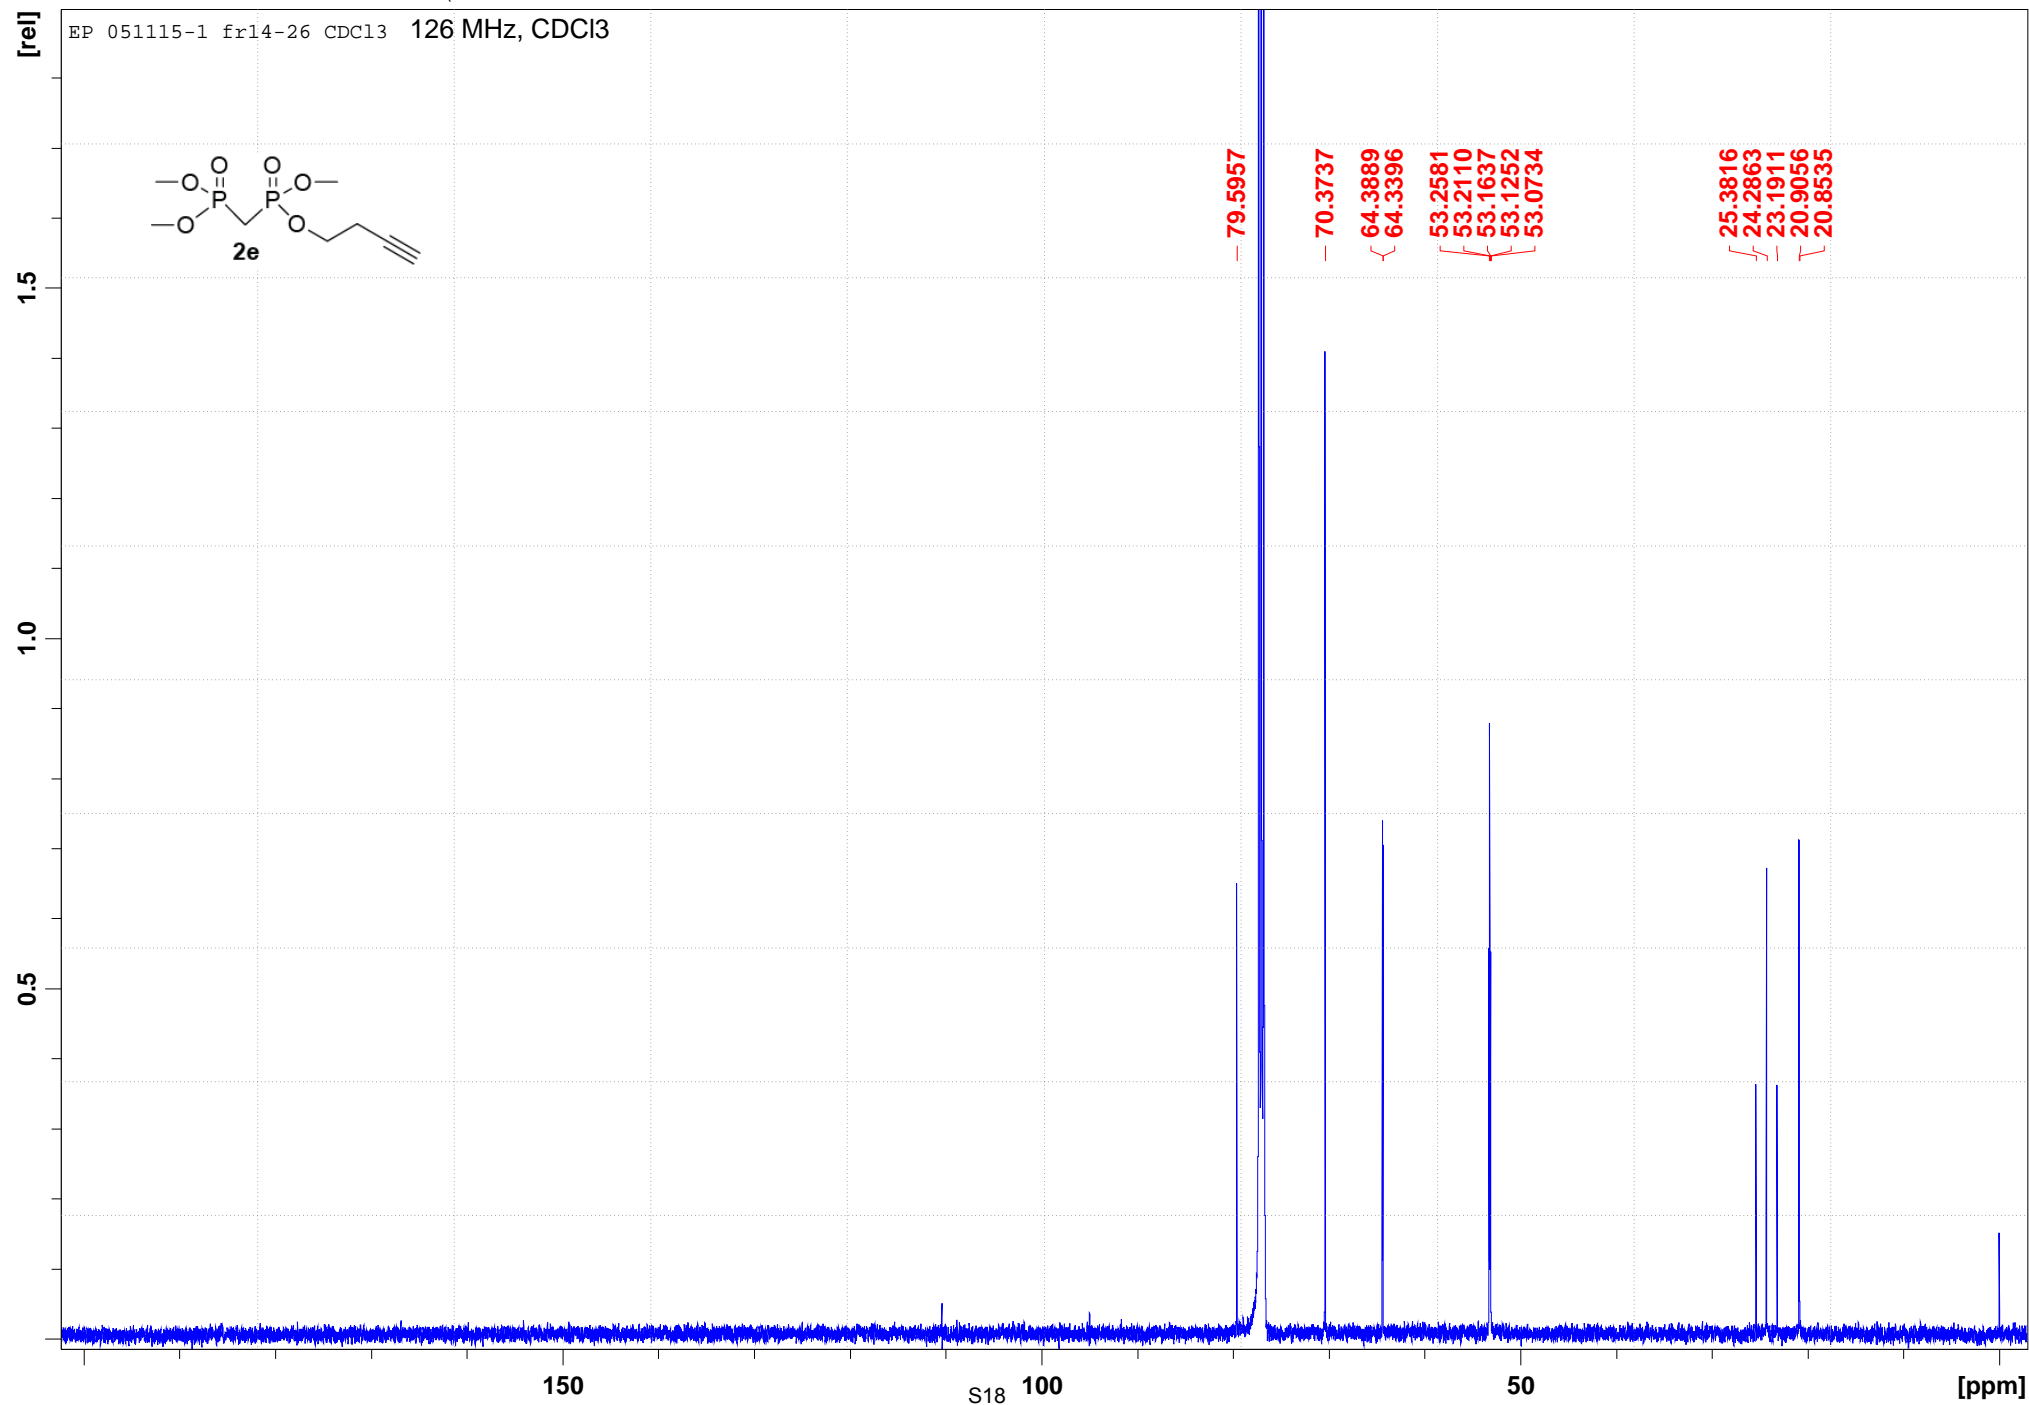

151105-1 52 1 "E:\NMR 2015"

EP 051115-1 fr14-26 CDCl3 202 MHz, CDCl3

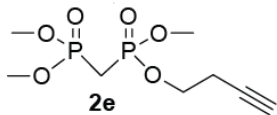

21.7714  
21.7449  
20.9437  
20.9171

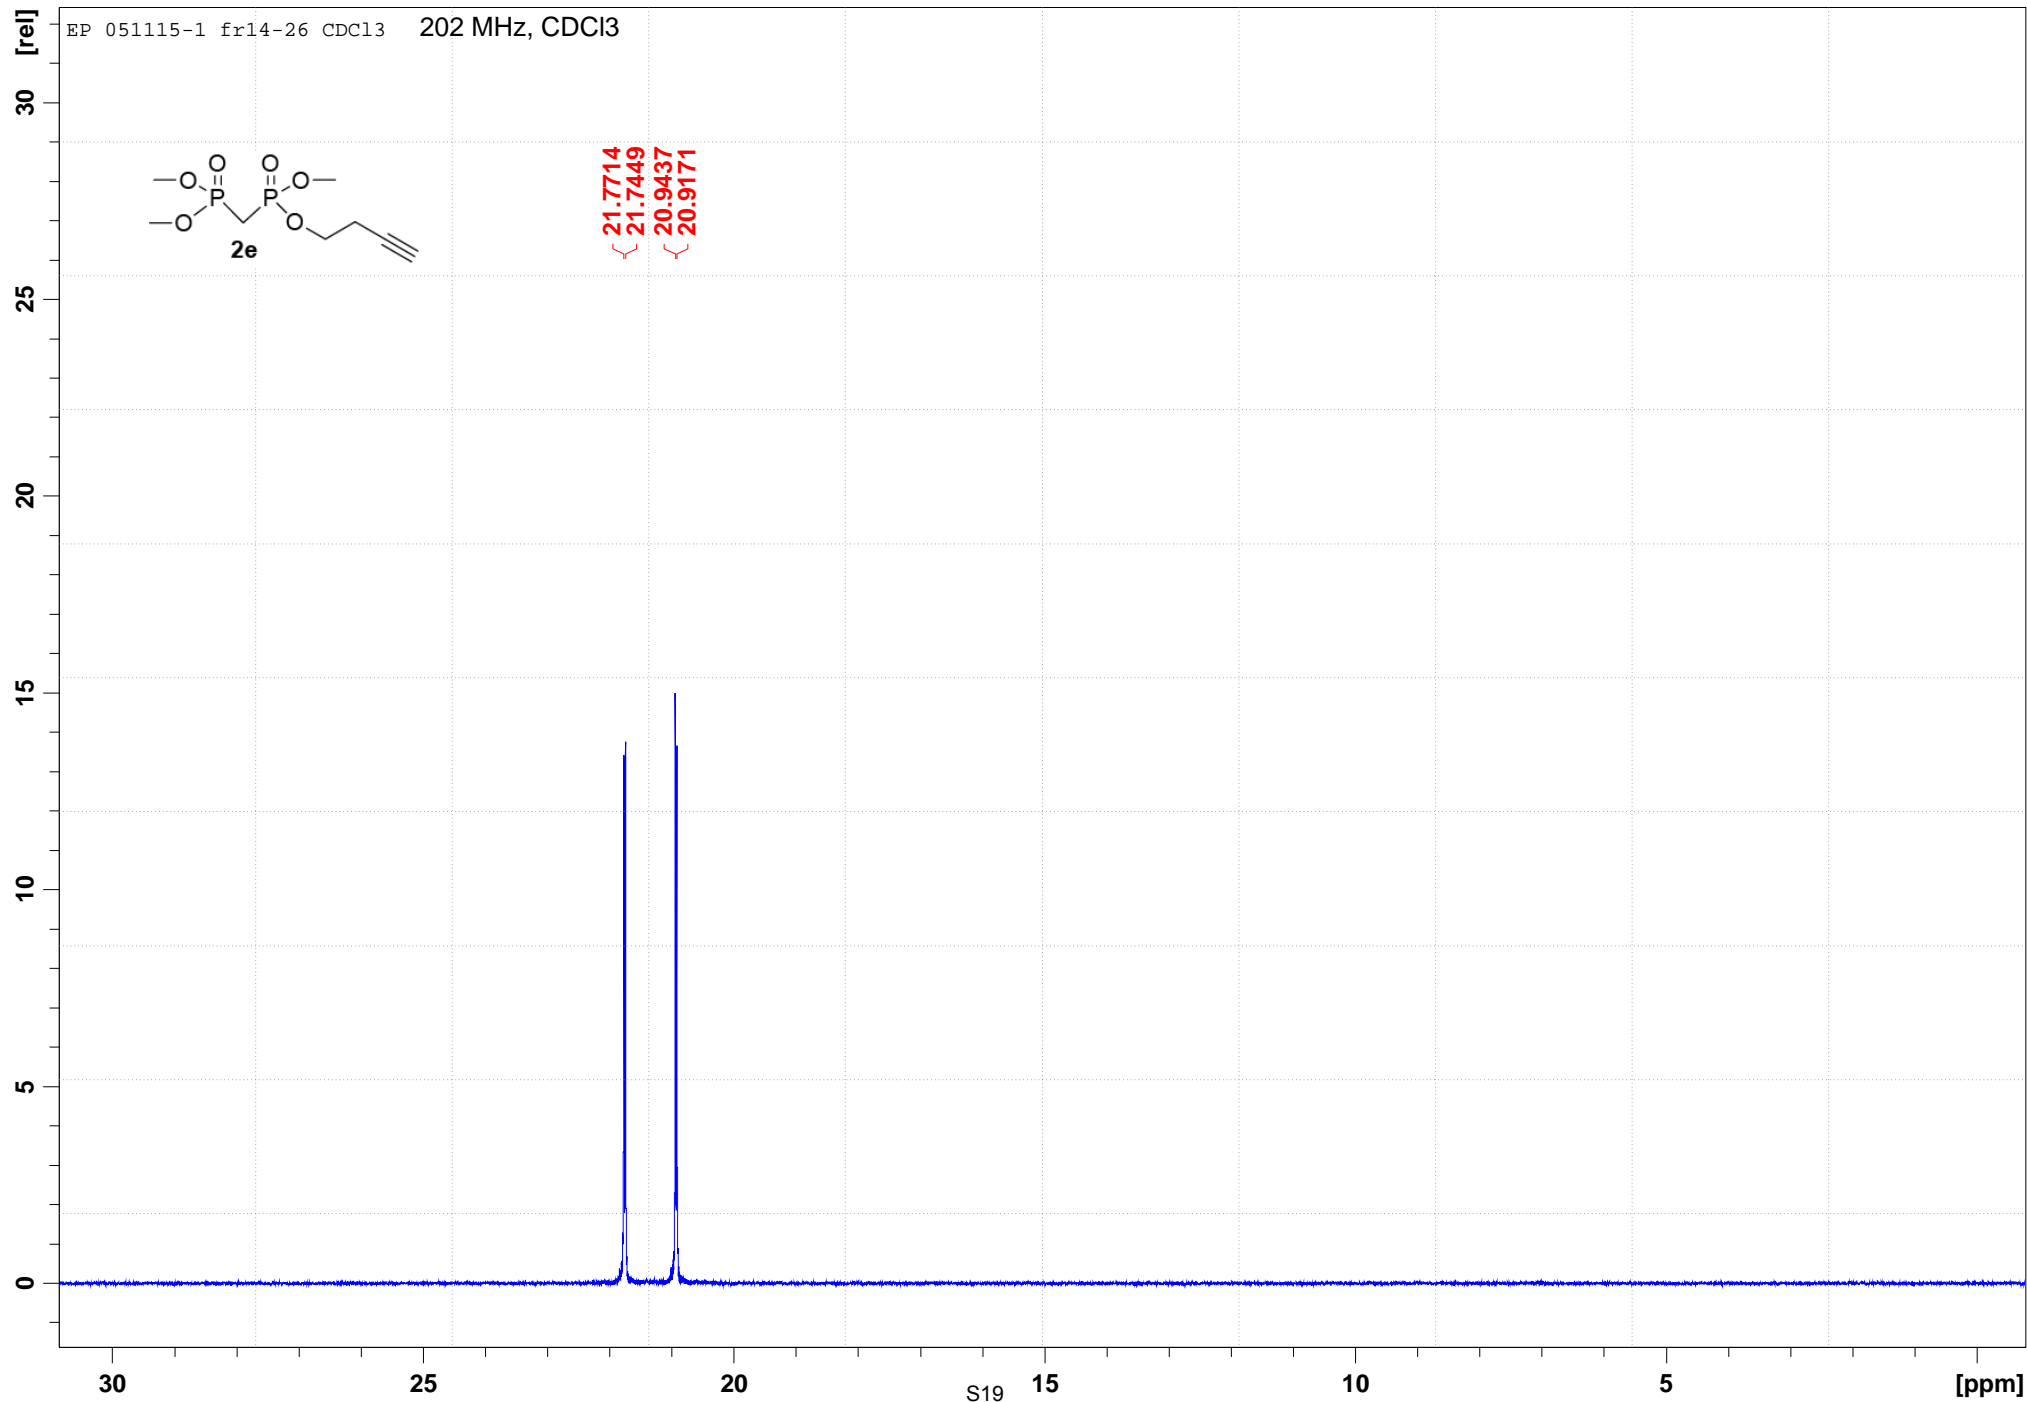

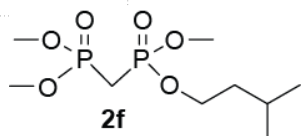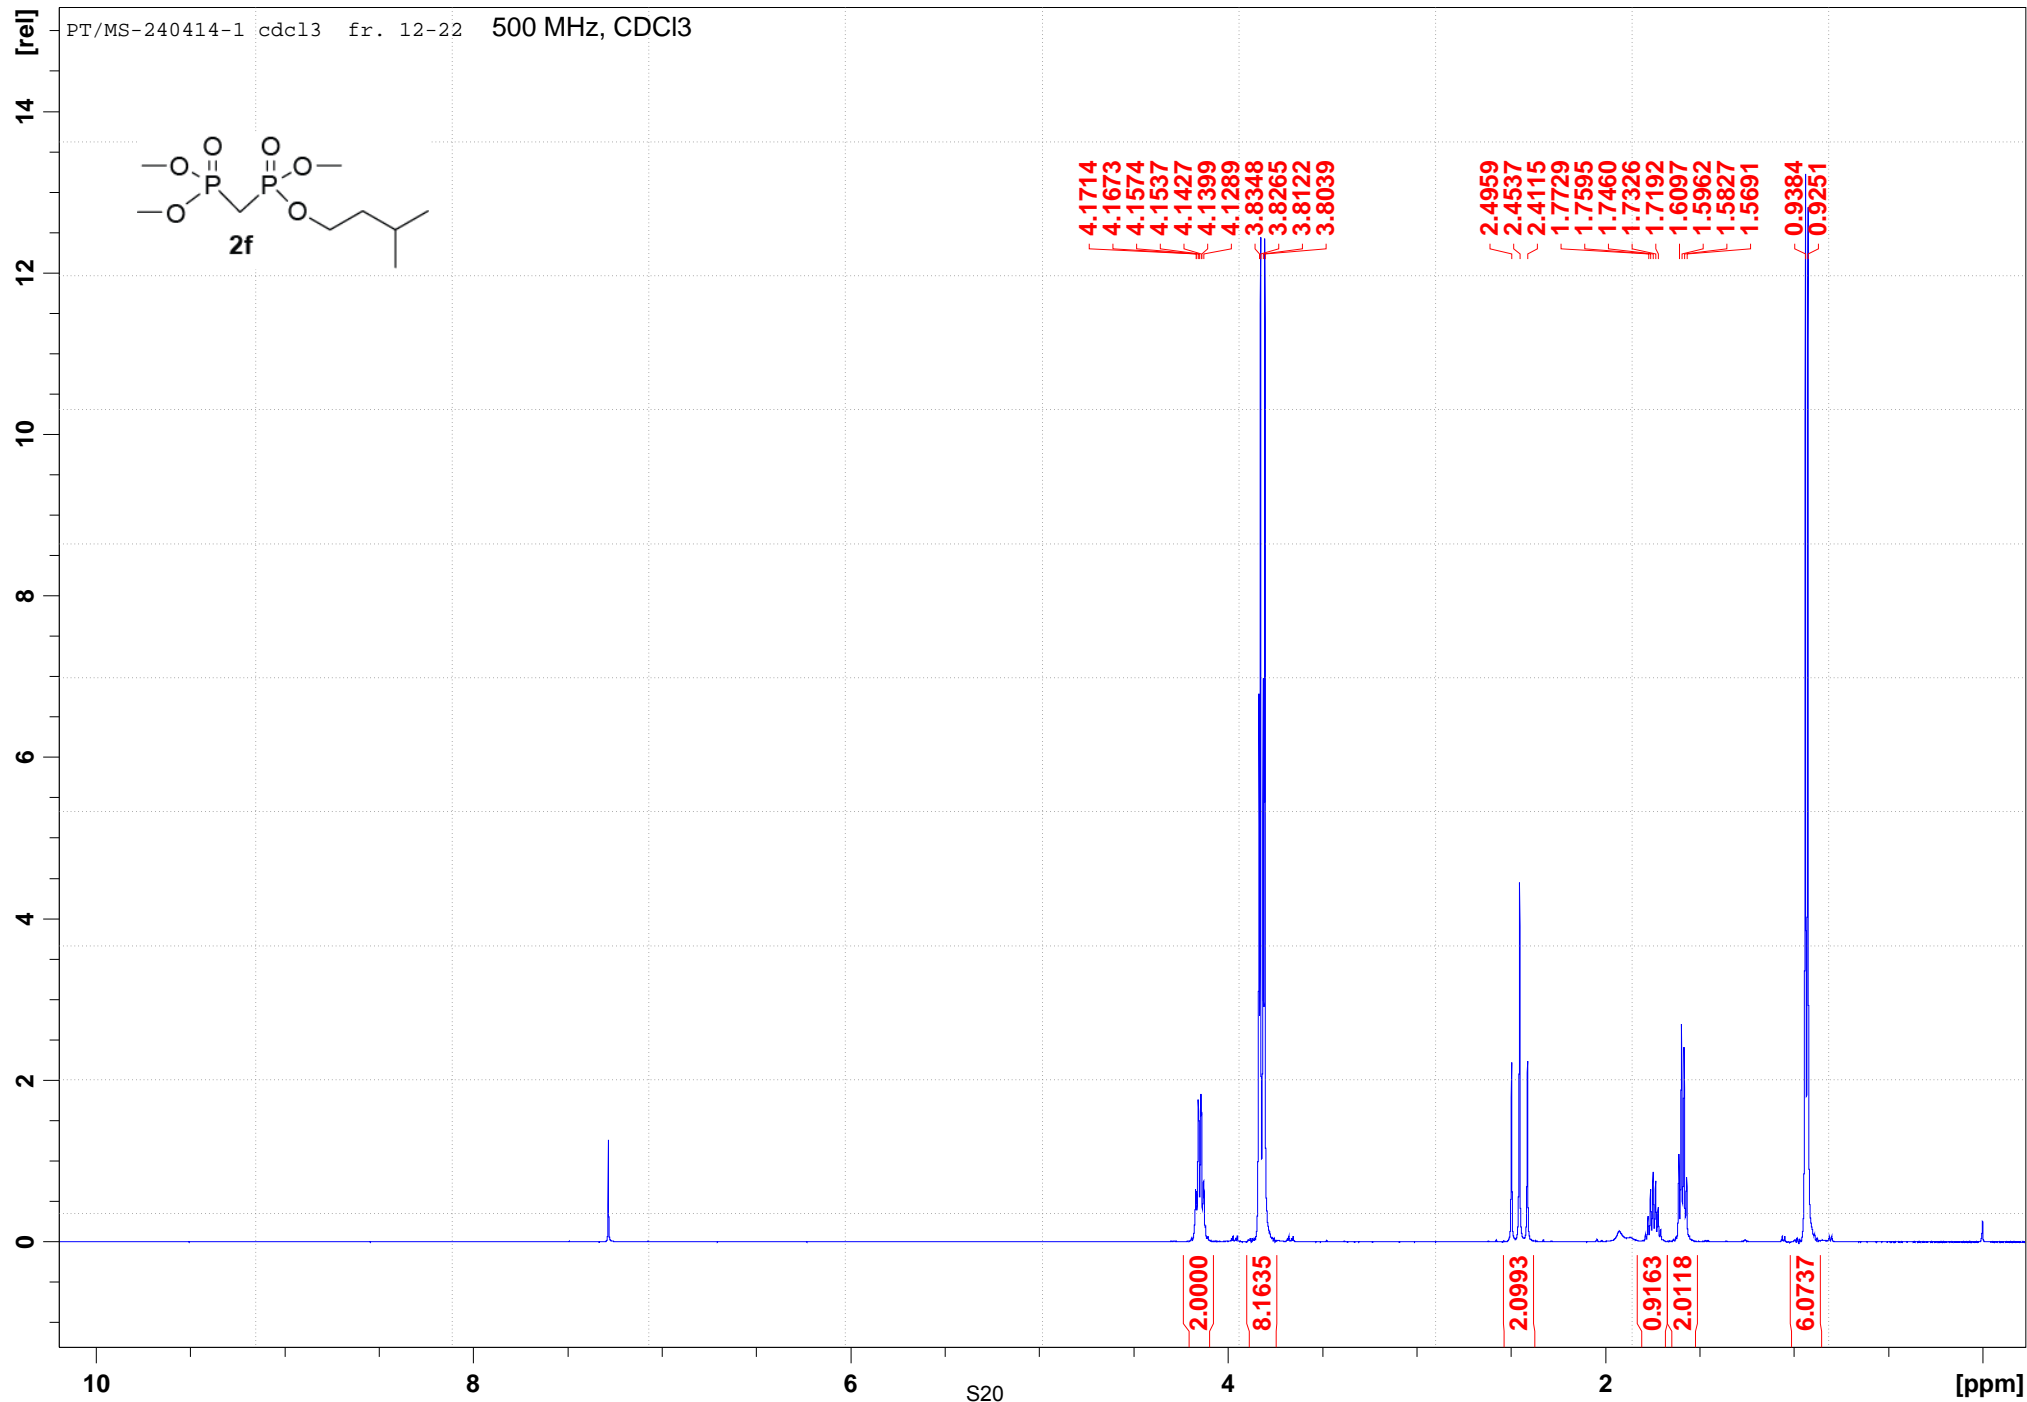

MS-240414-1 33 1 "E:\NMR 2015"

PT/MS-240414-1 cdcl3 fr. 12-22 126 MHz, CDCl3

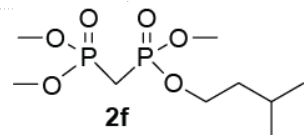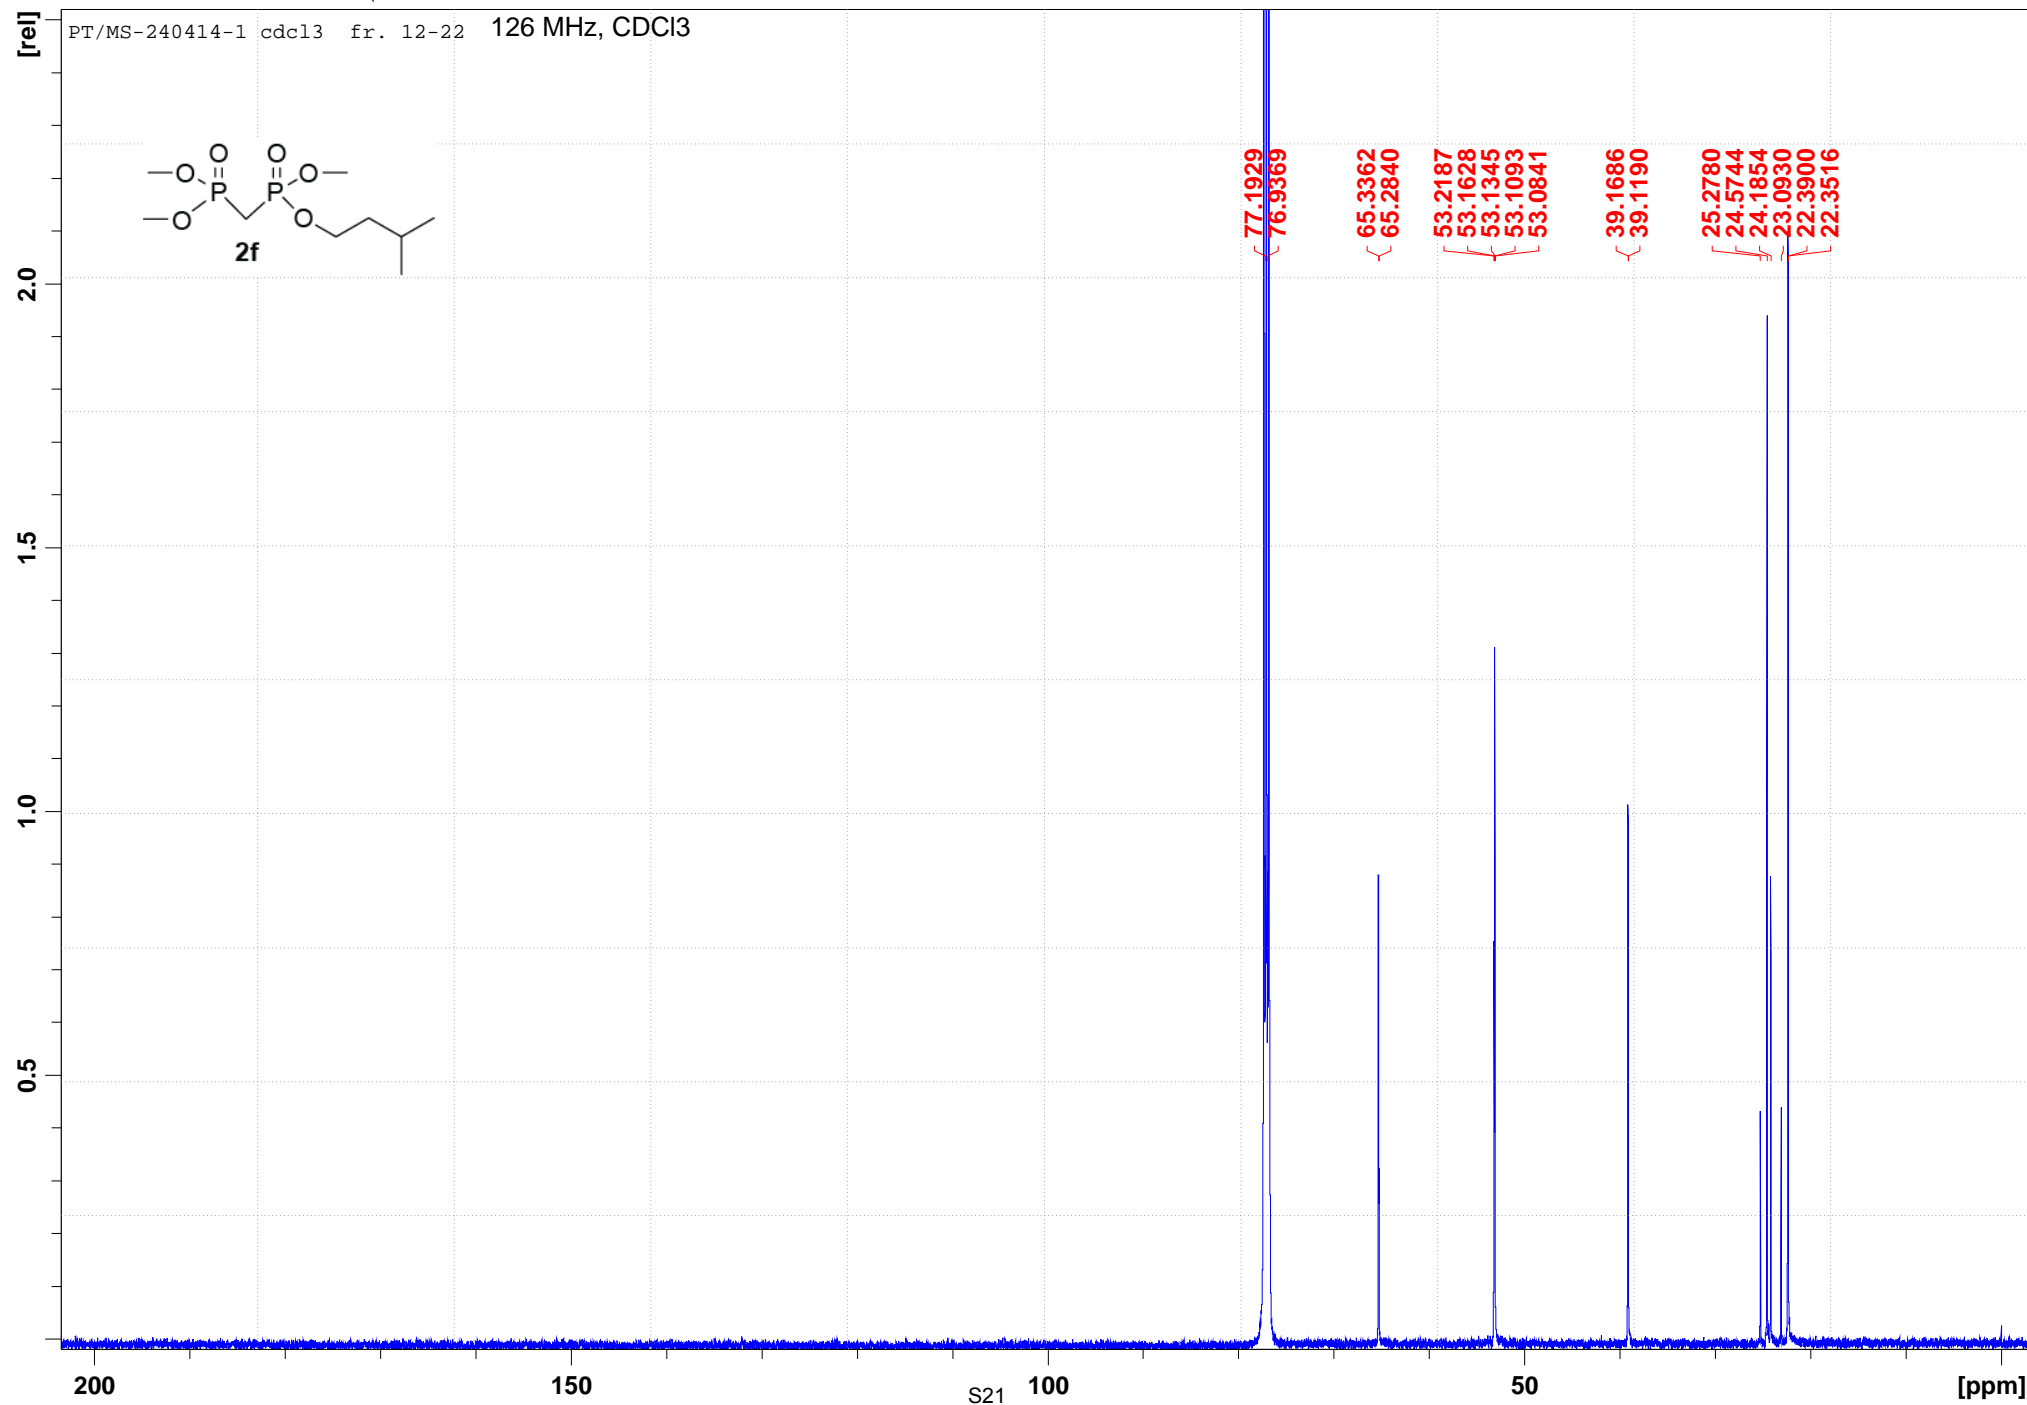

MS-240414-1 11 1 "E:\NMR 2015"

PT/MS-240414-1 cdcl3 fr. 12-22 202 MHz, CDCl3

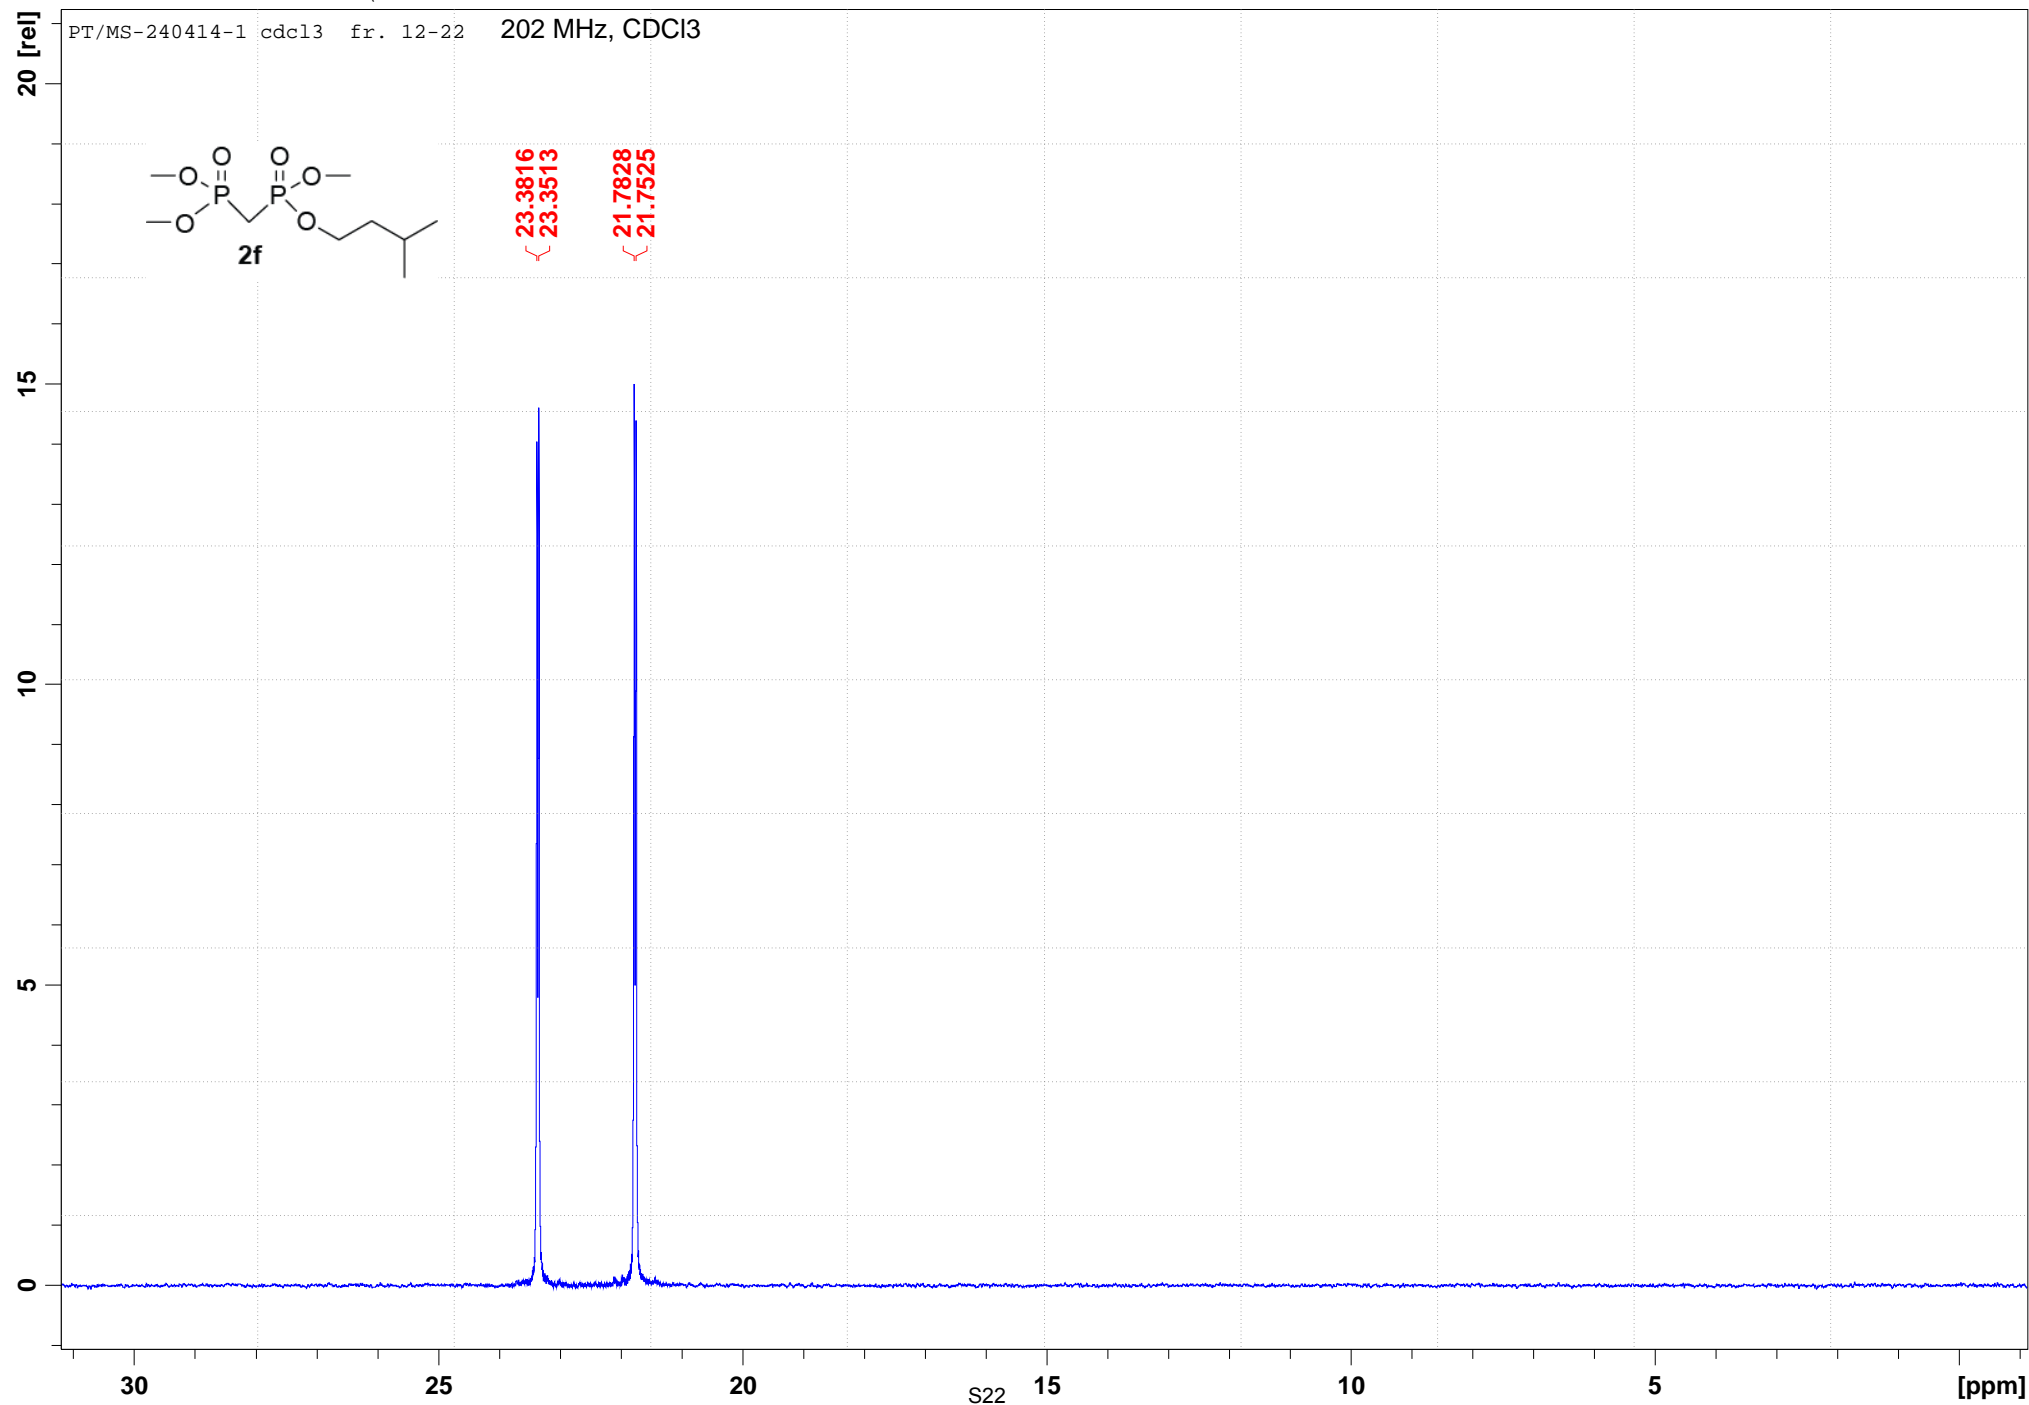

EPNL-081215-1 10 1 "E:\NMR 2015"

EPNL-081215-1 CDC13 600 MHz, CDCl3

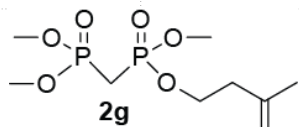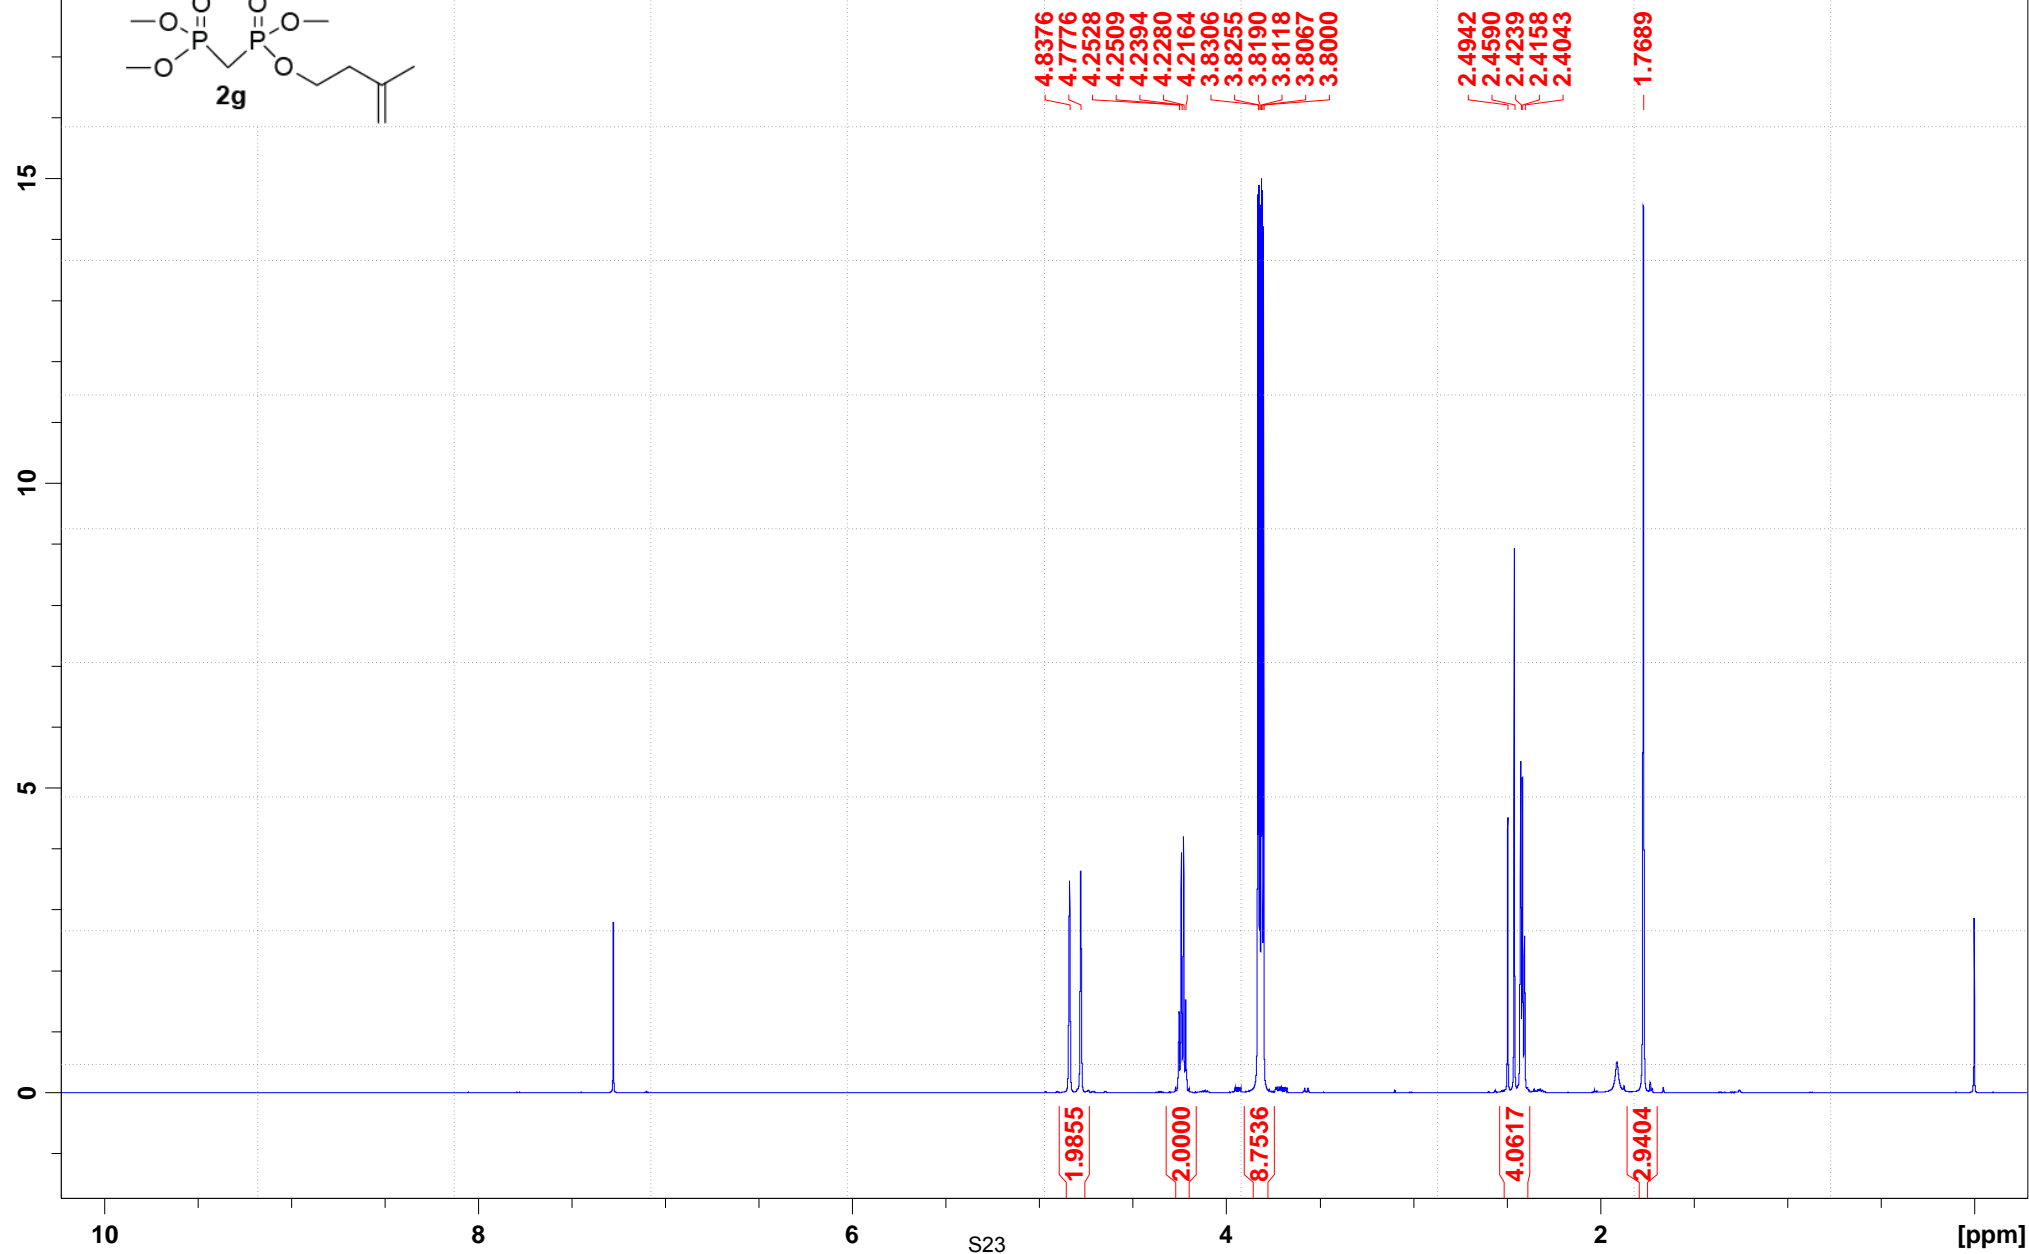

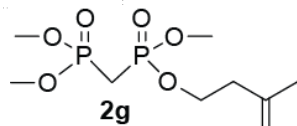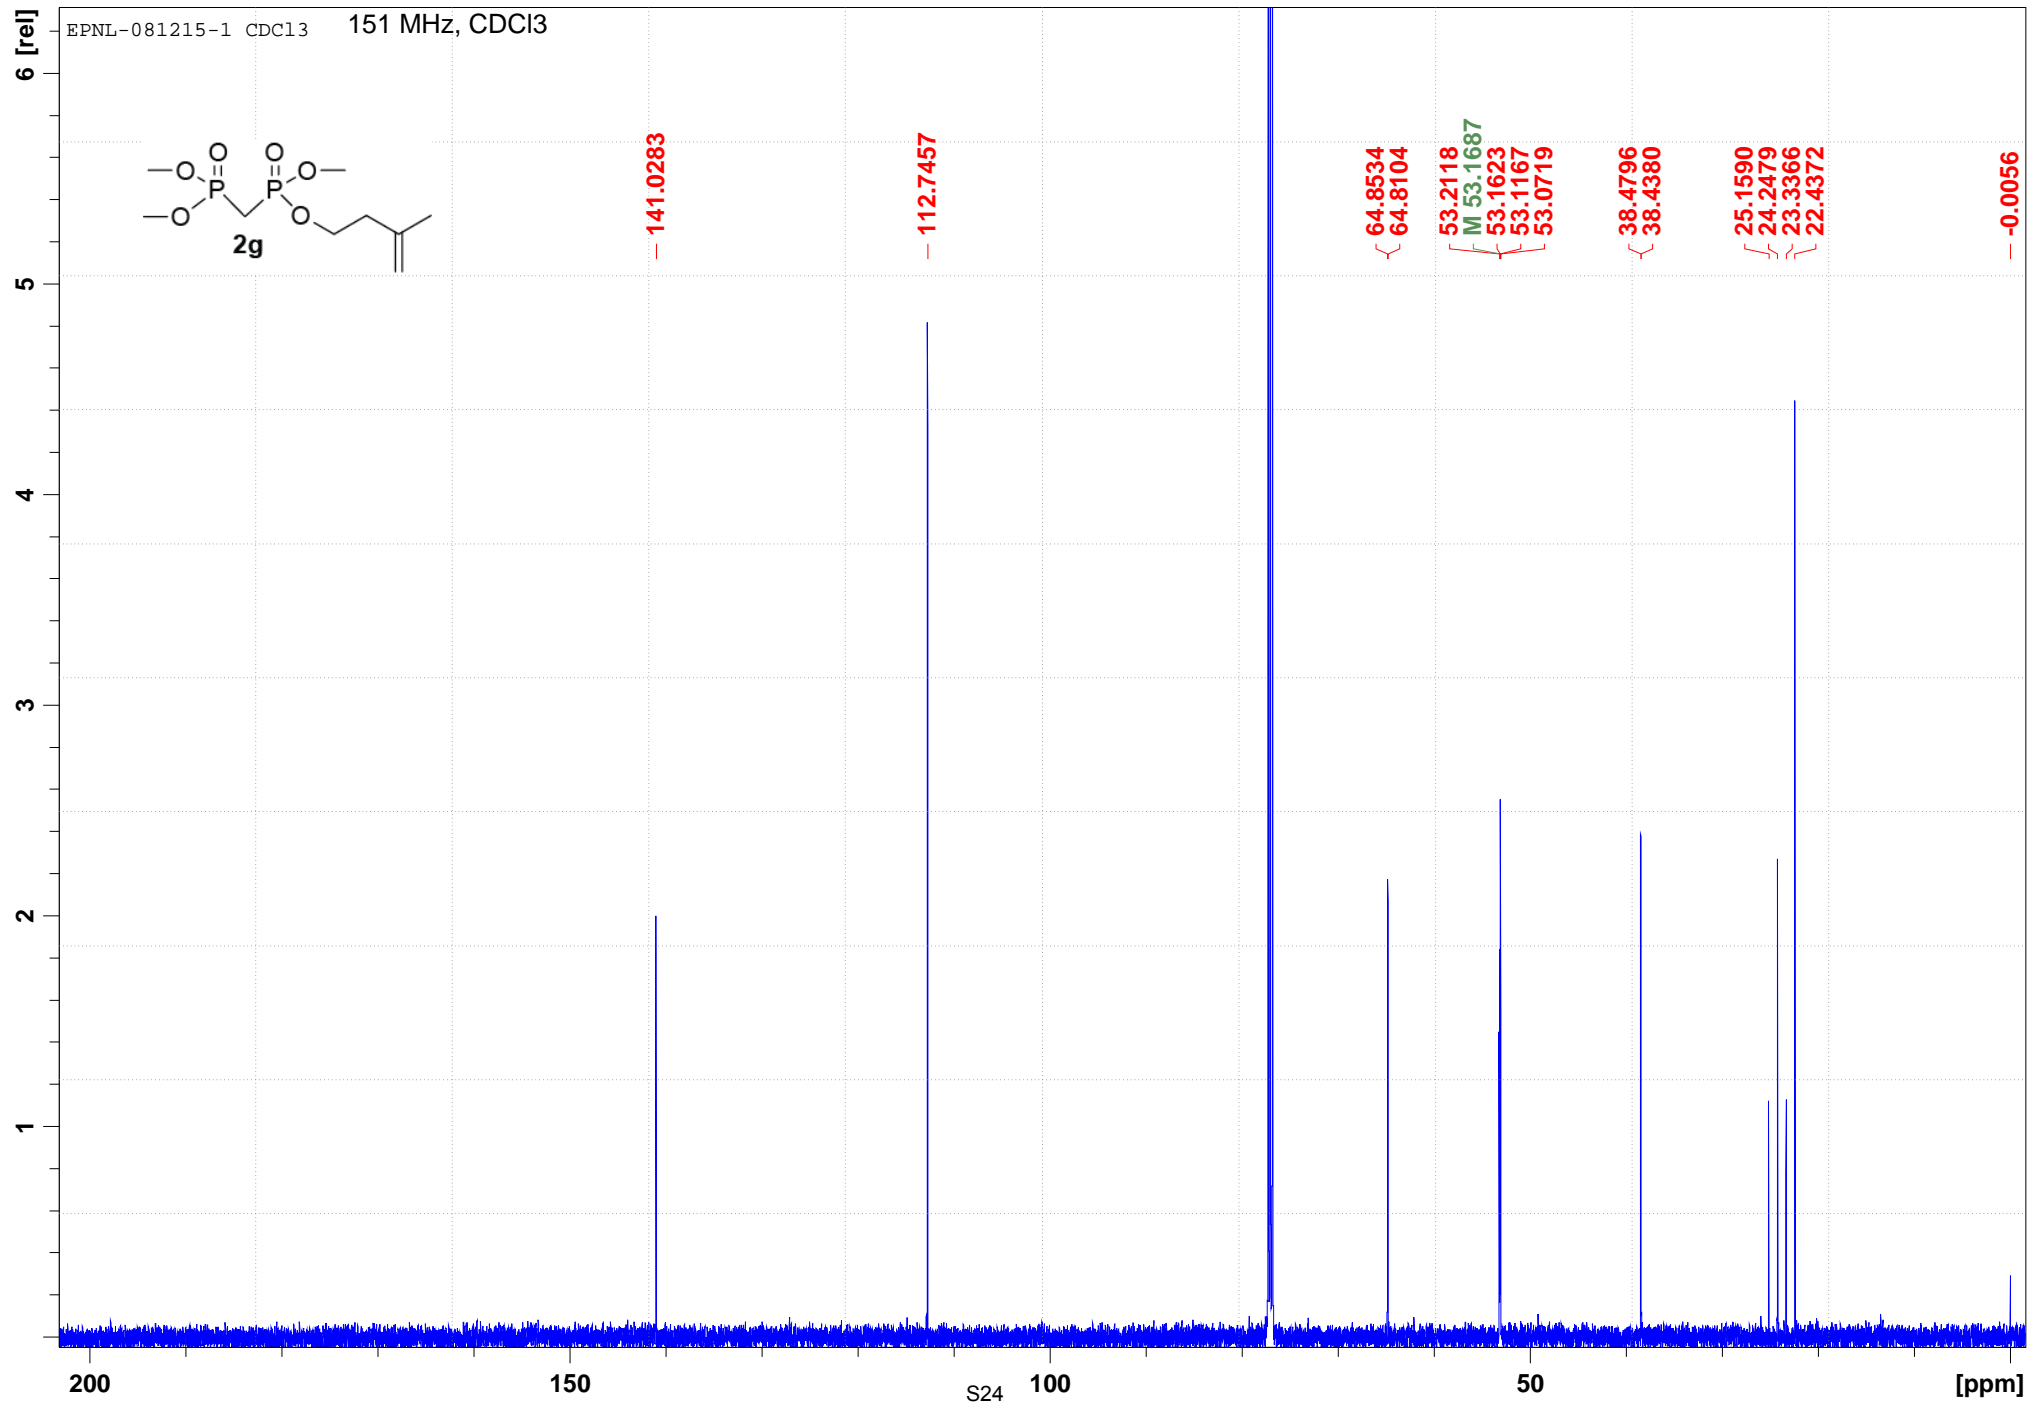



EPNL-081215-1 11 1 "E:\NMR 2015"

EPNL-081215-1 CDC13 243 MHz, CDCl3

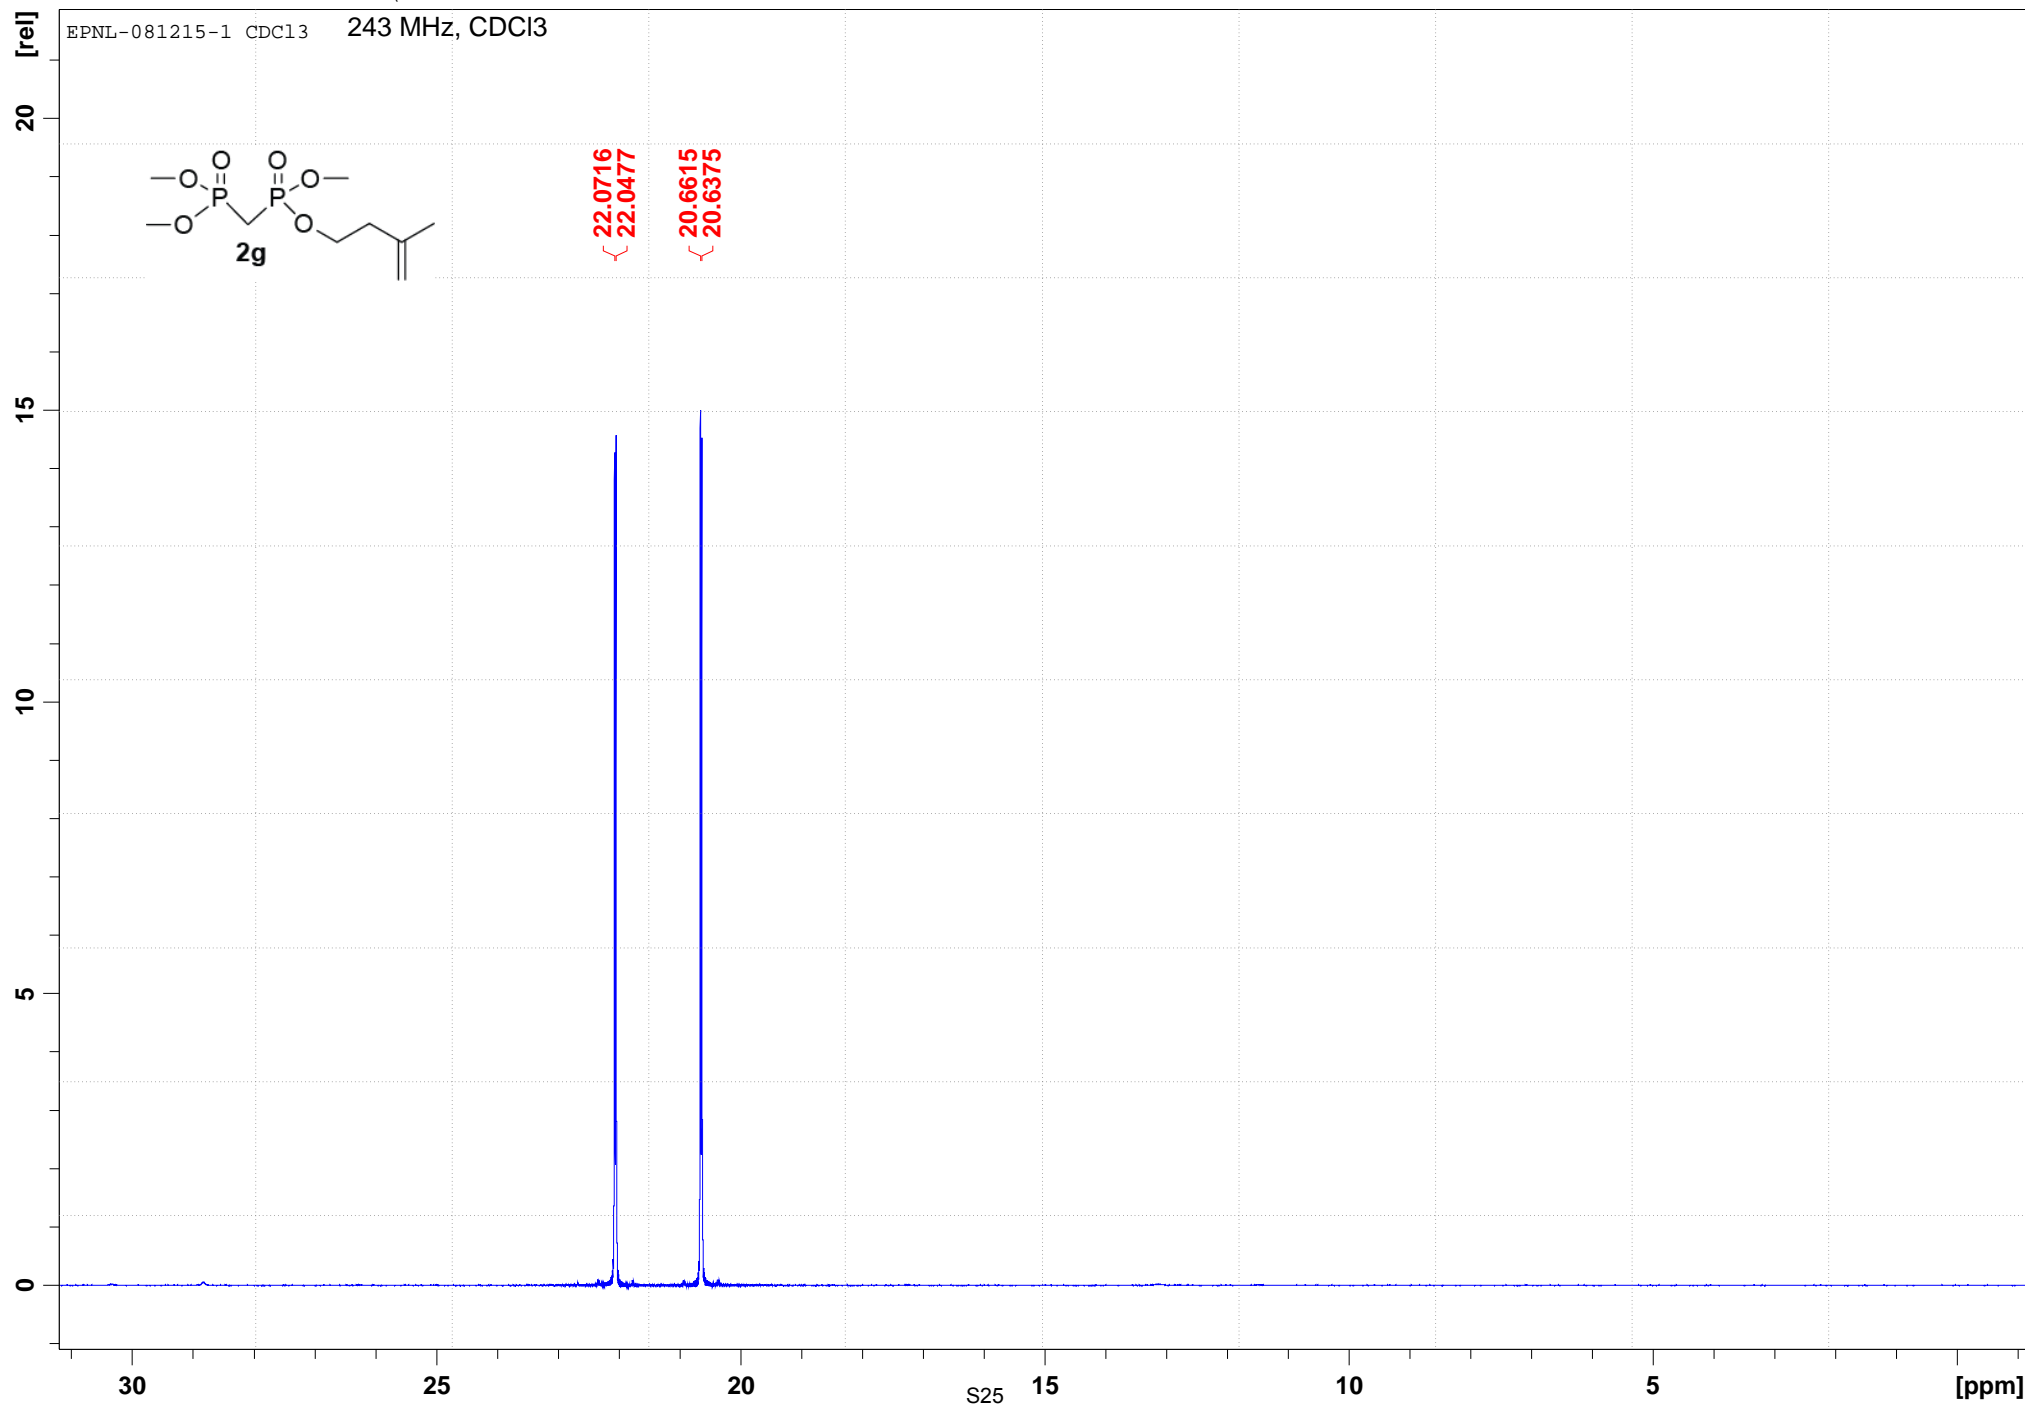

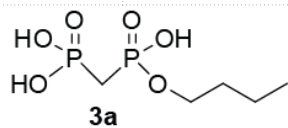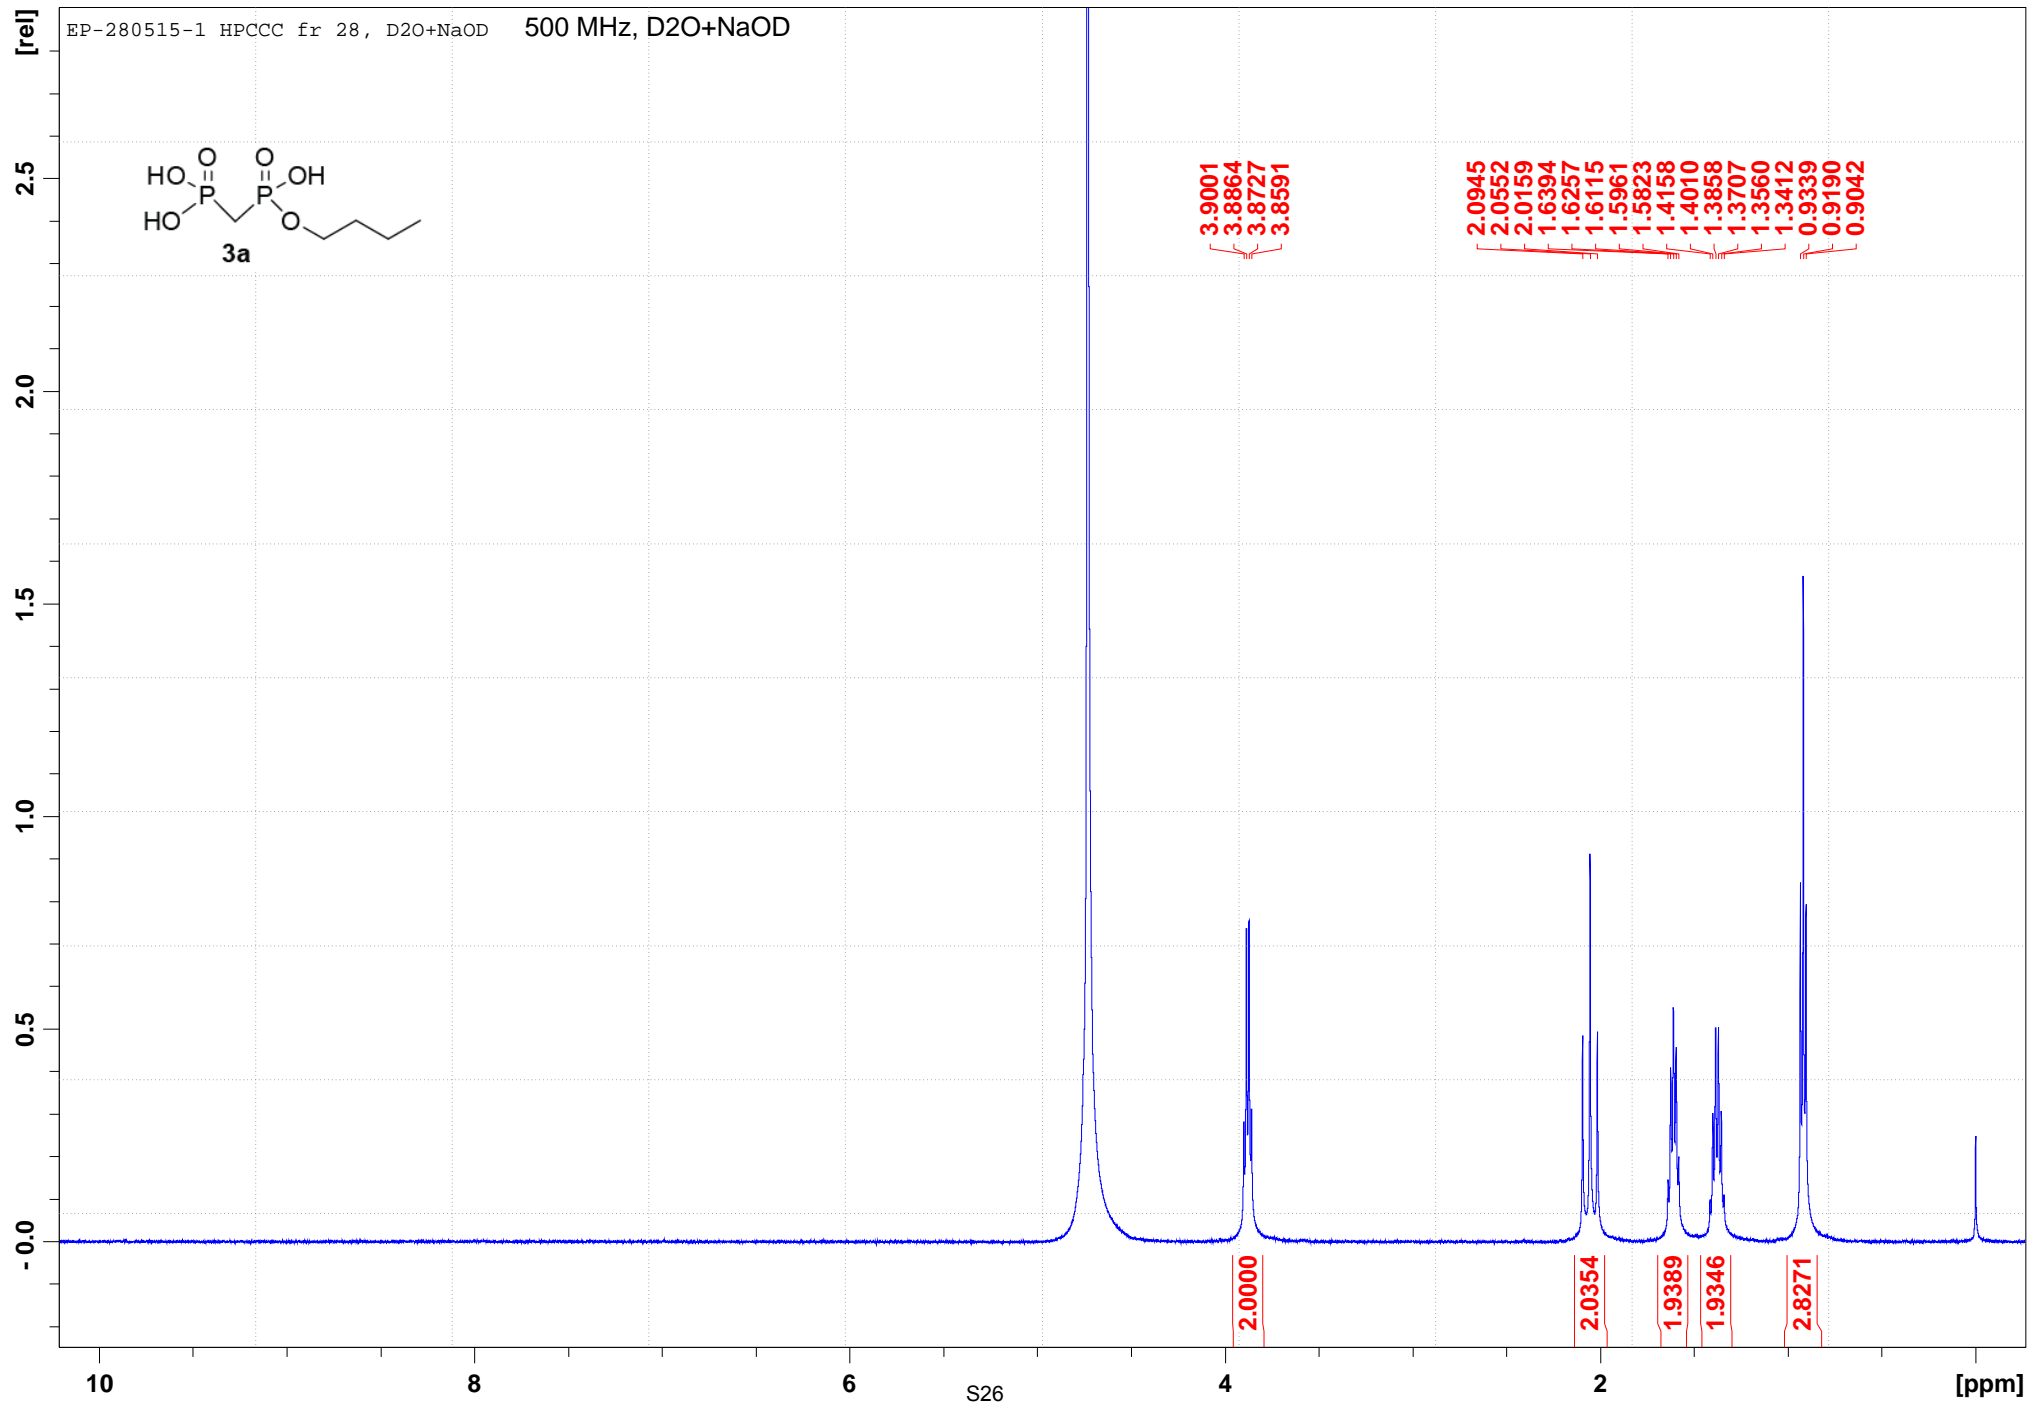

10

8

6

S26

4

2

[ppm]

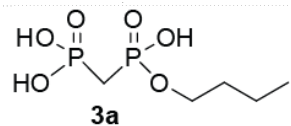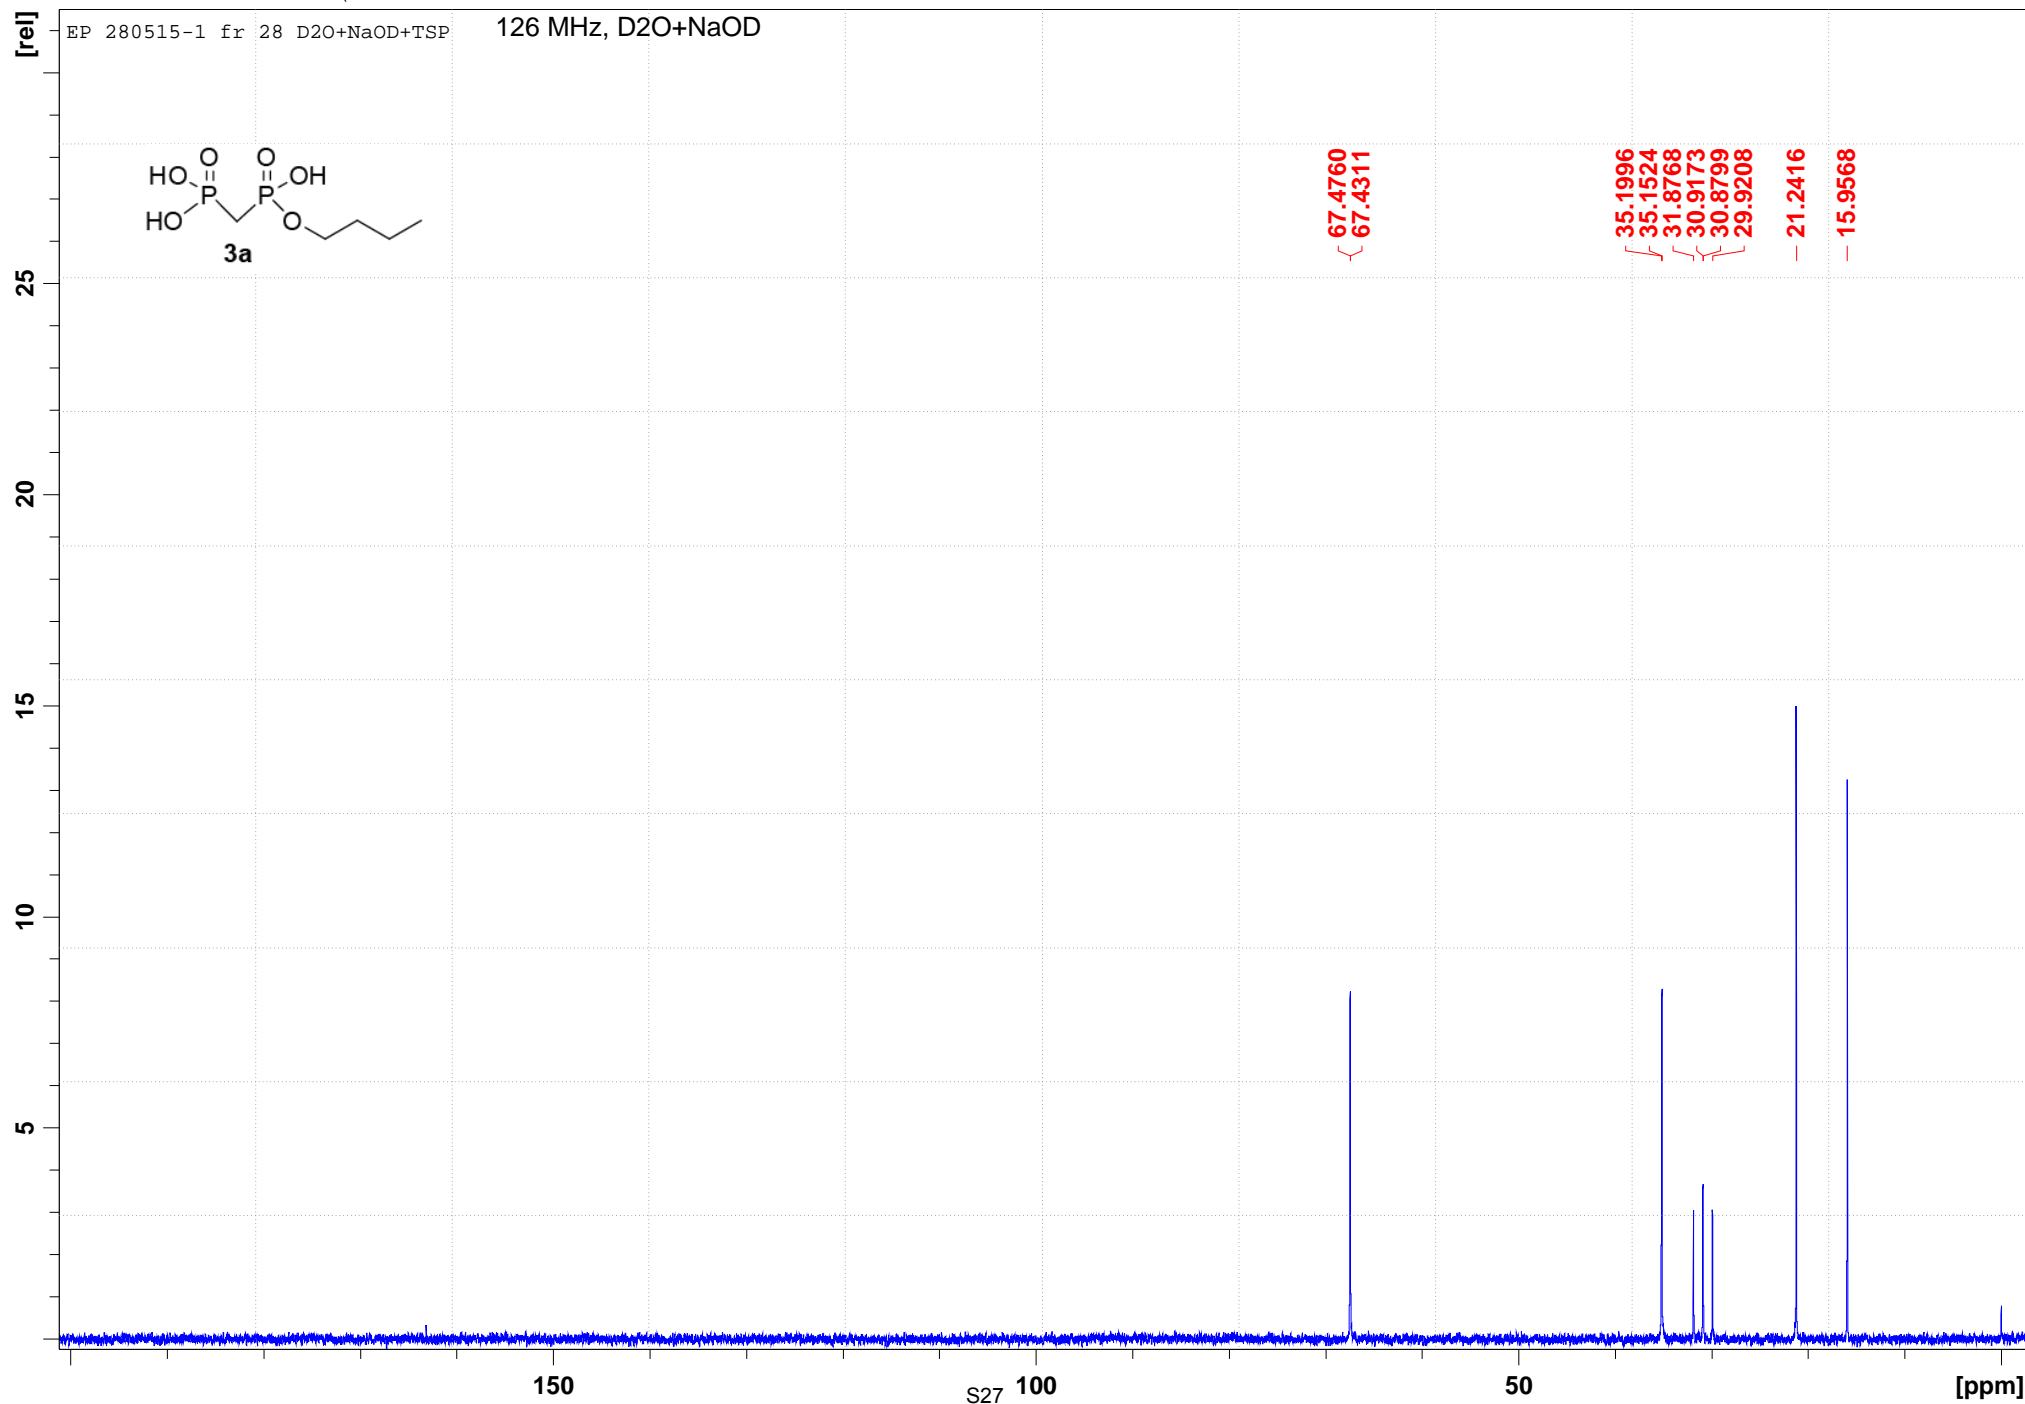

150528-1 112 1 "E:\NMR 2015"

EP-280515-1 HPLCC fr 28, D2O+NaOD 202 MHz, D2O+NaOD

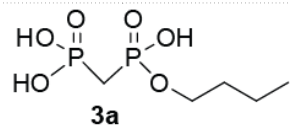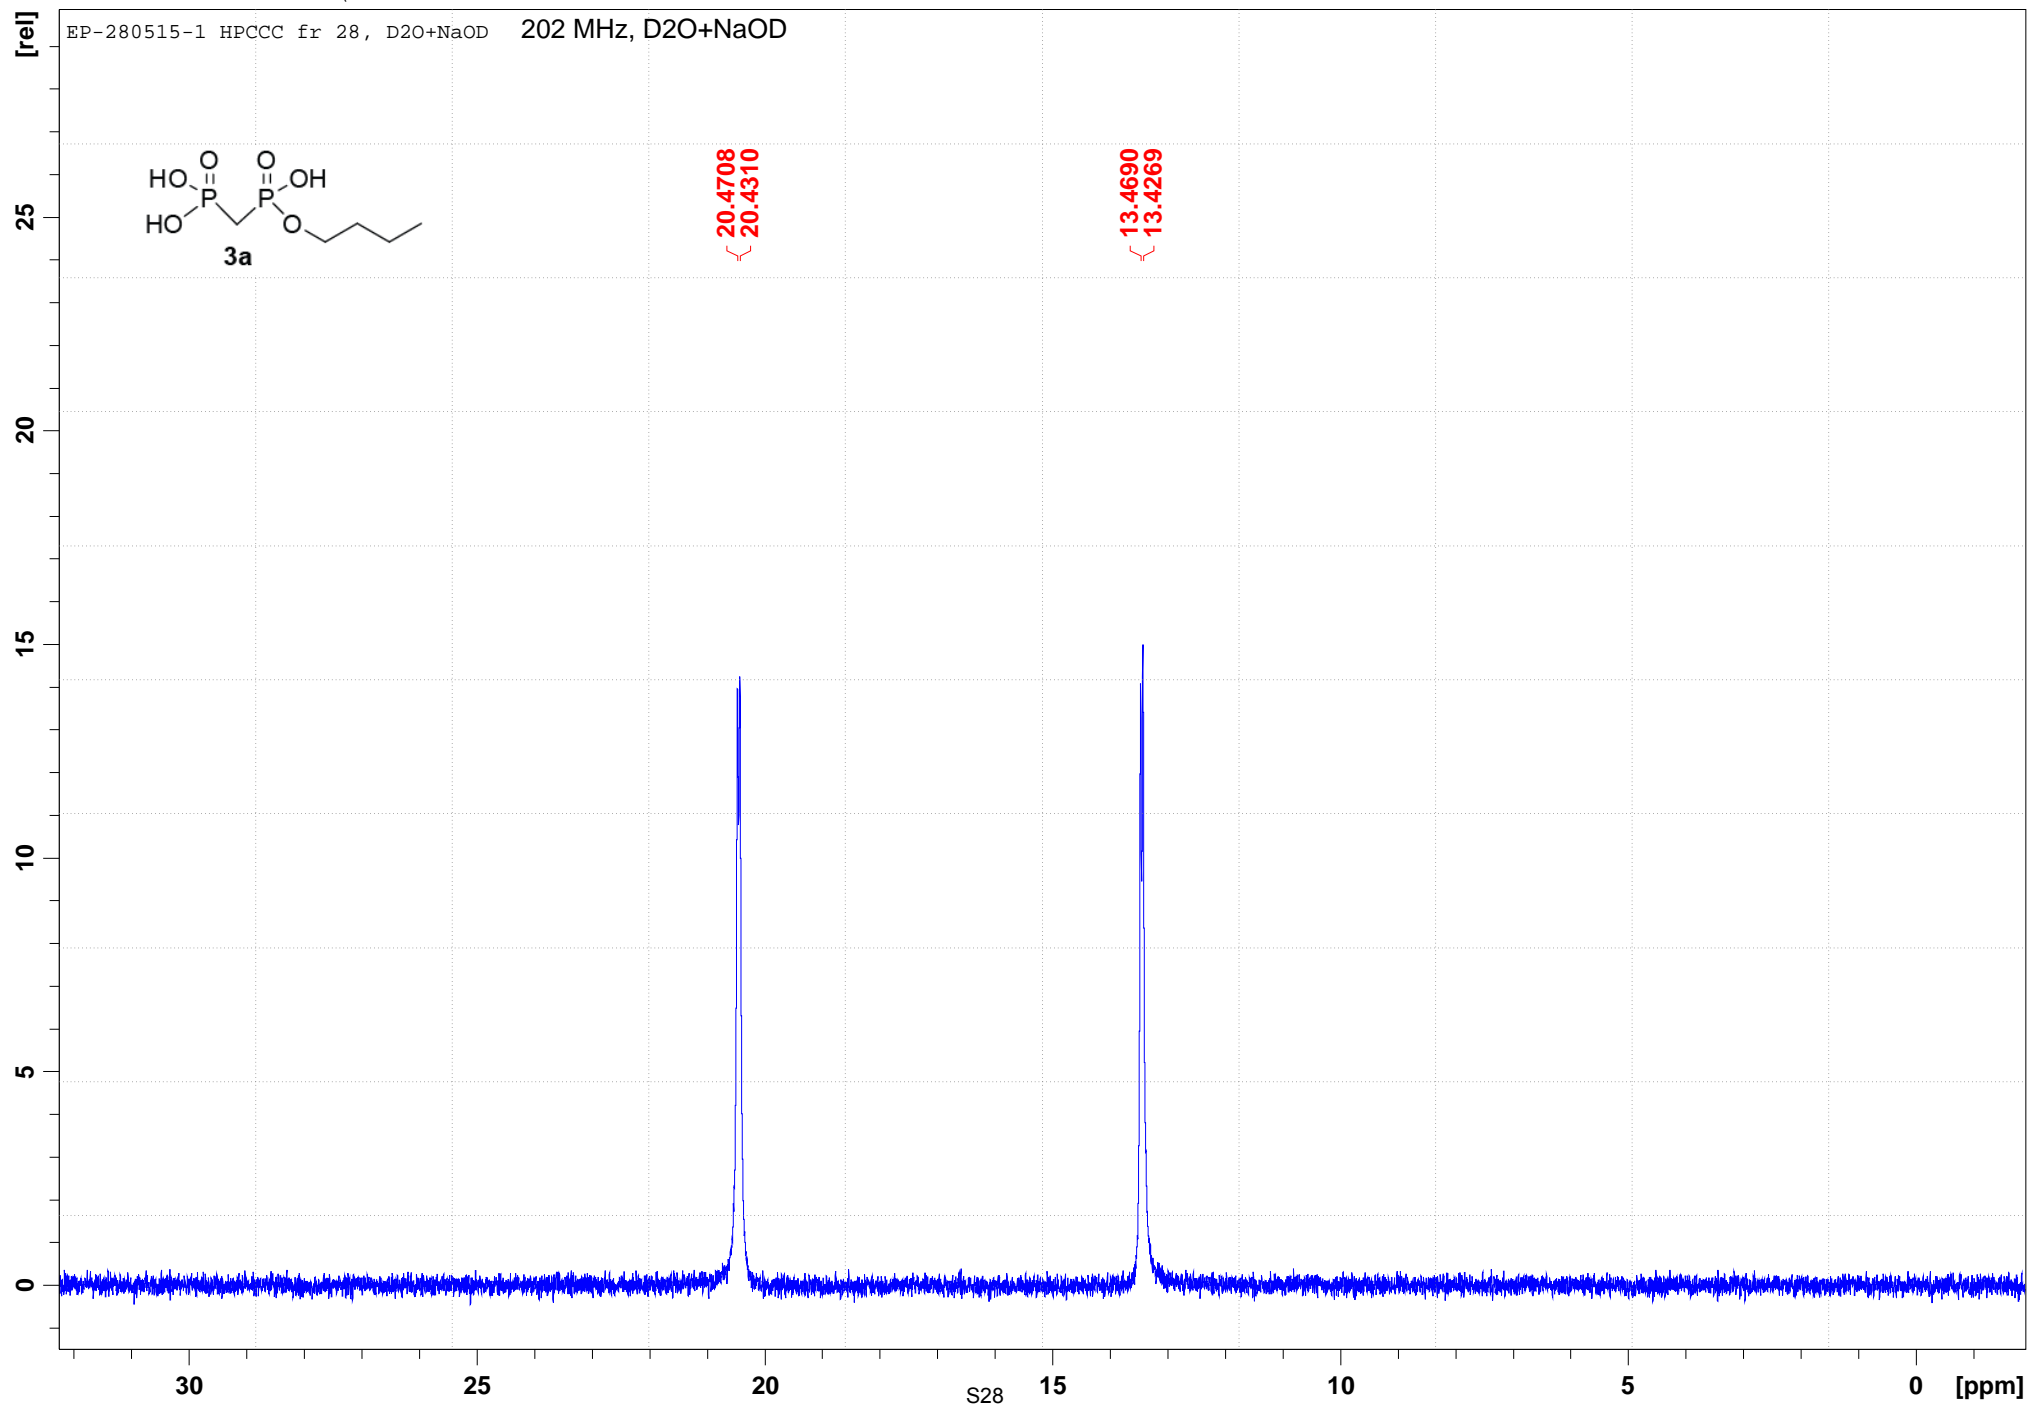

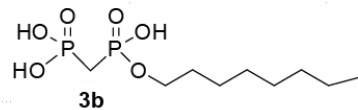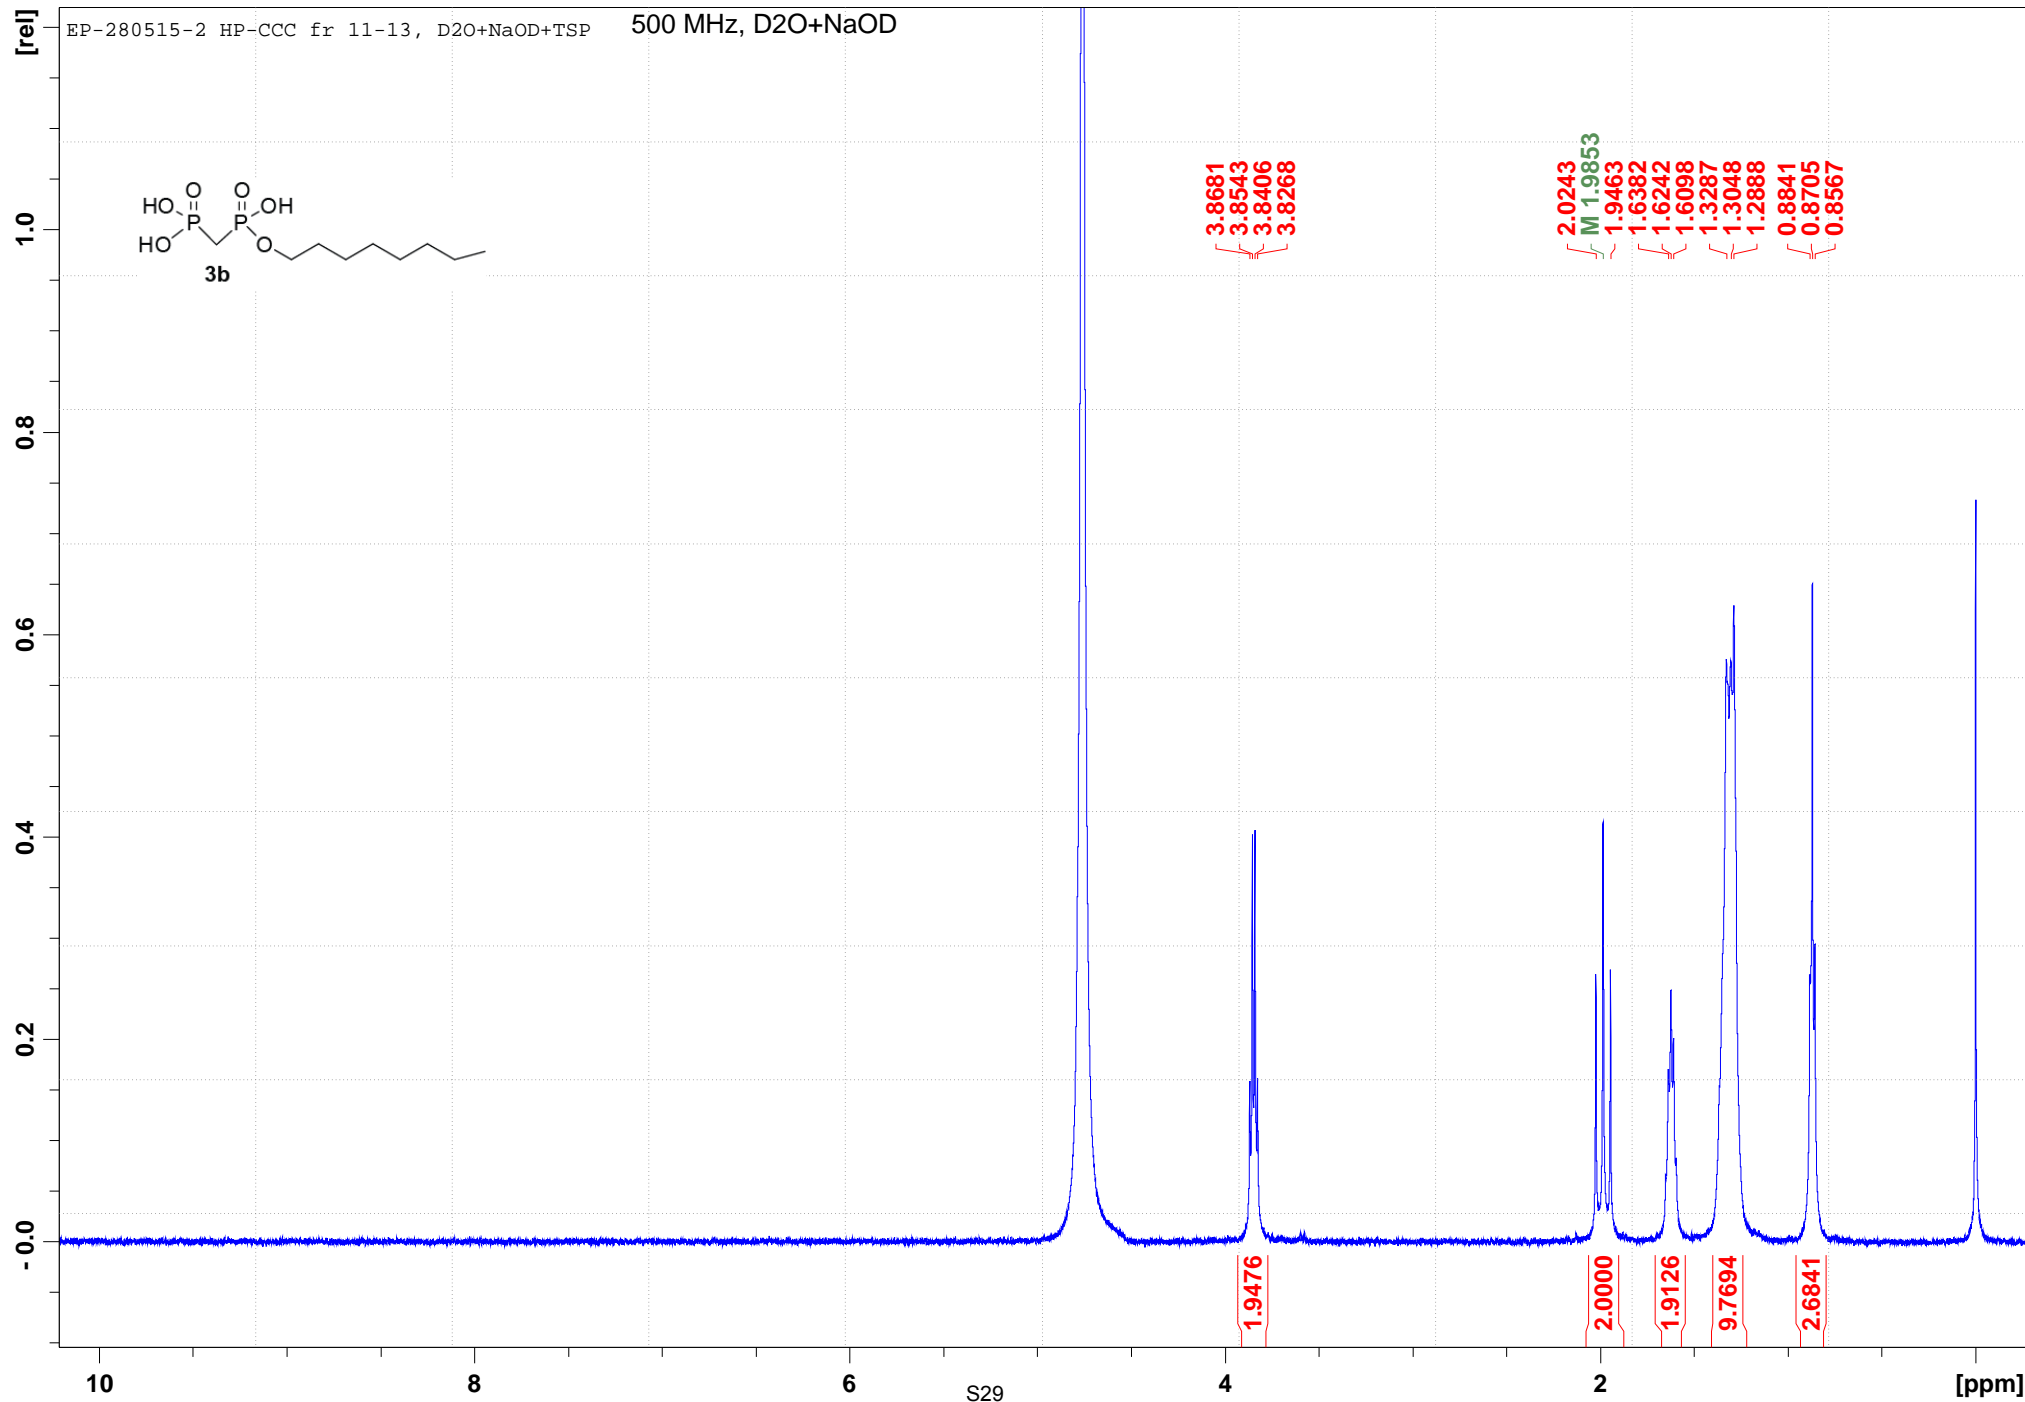

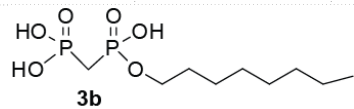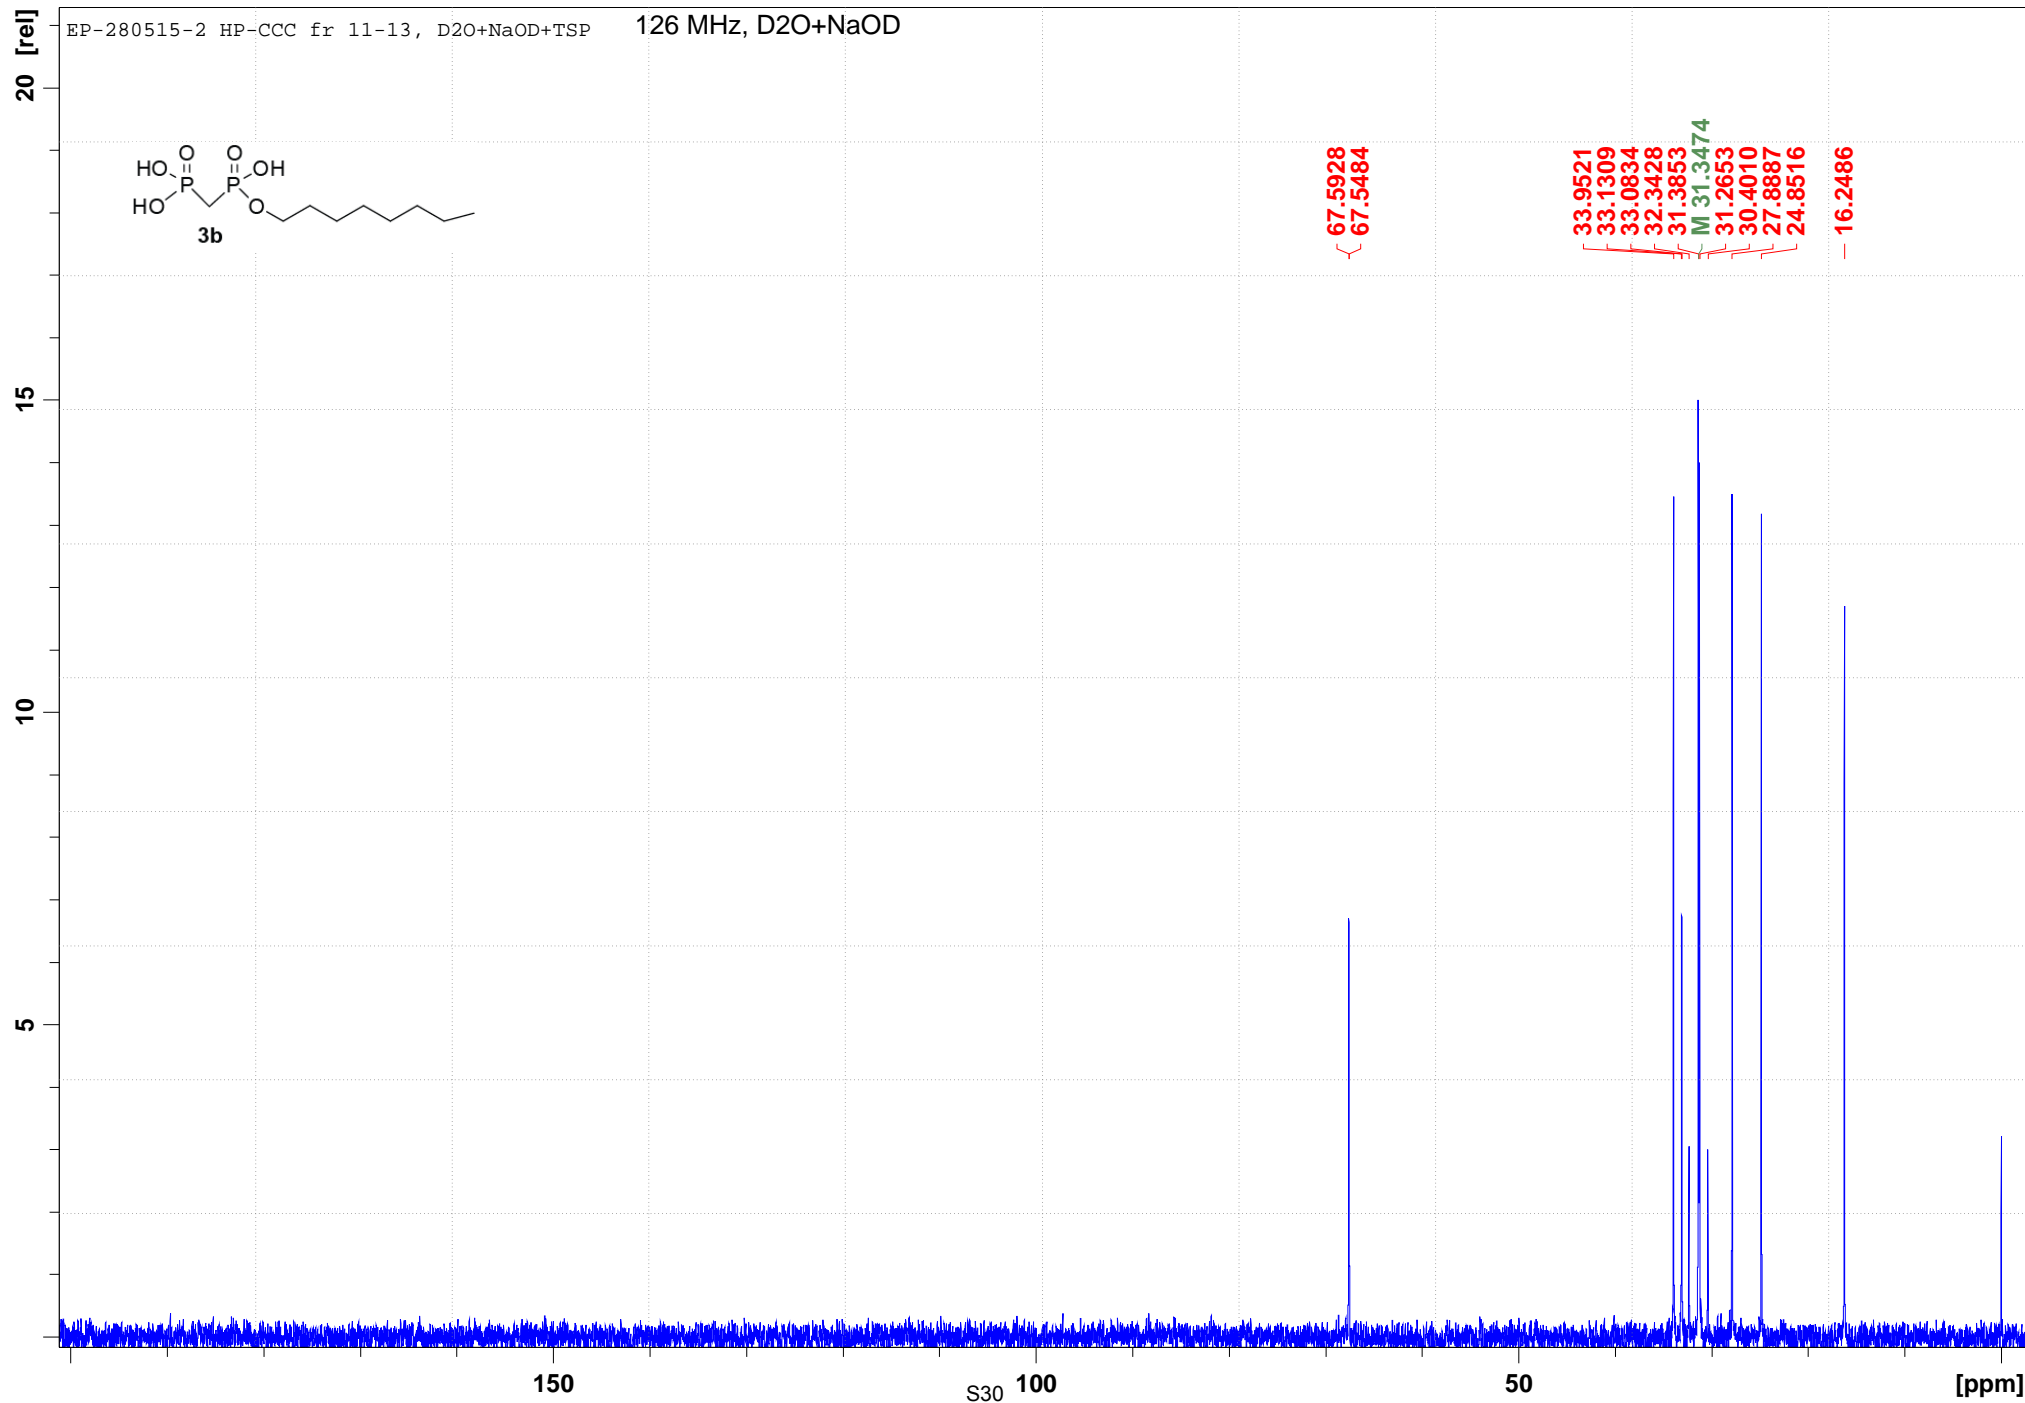

150528-2 92 1 "E:\NMR 2015"

EP-280515-2 HP-CCC fr 11-13, D2O+NaOD+TSP 202 MHz, D2O+NaOD

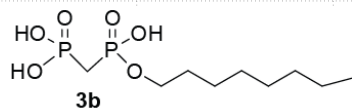

22.3918  
22.3499

12.1681  
12.1264

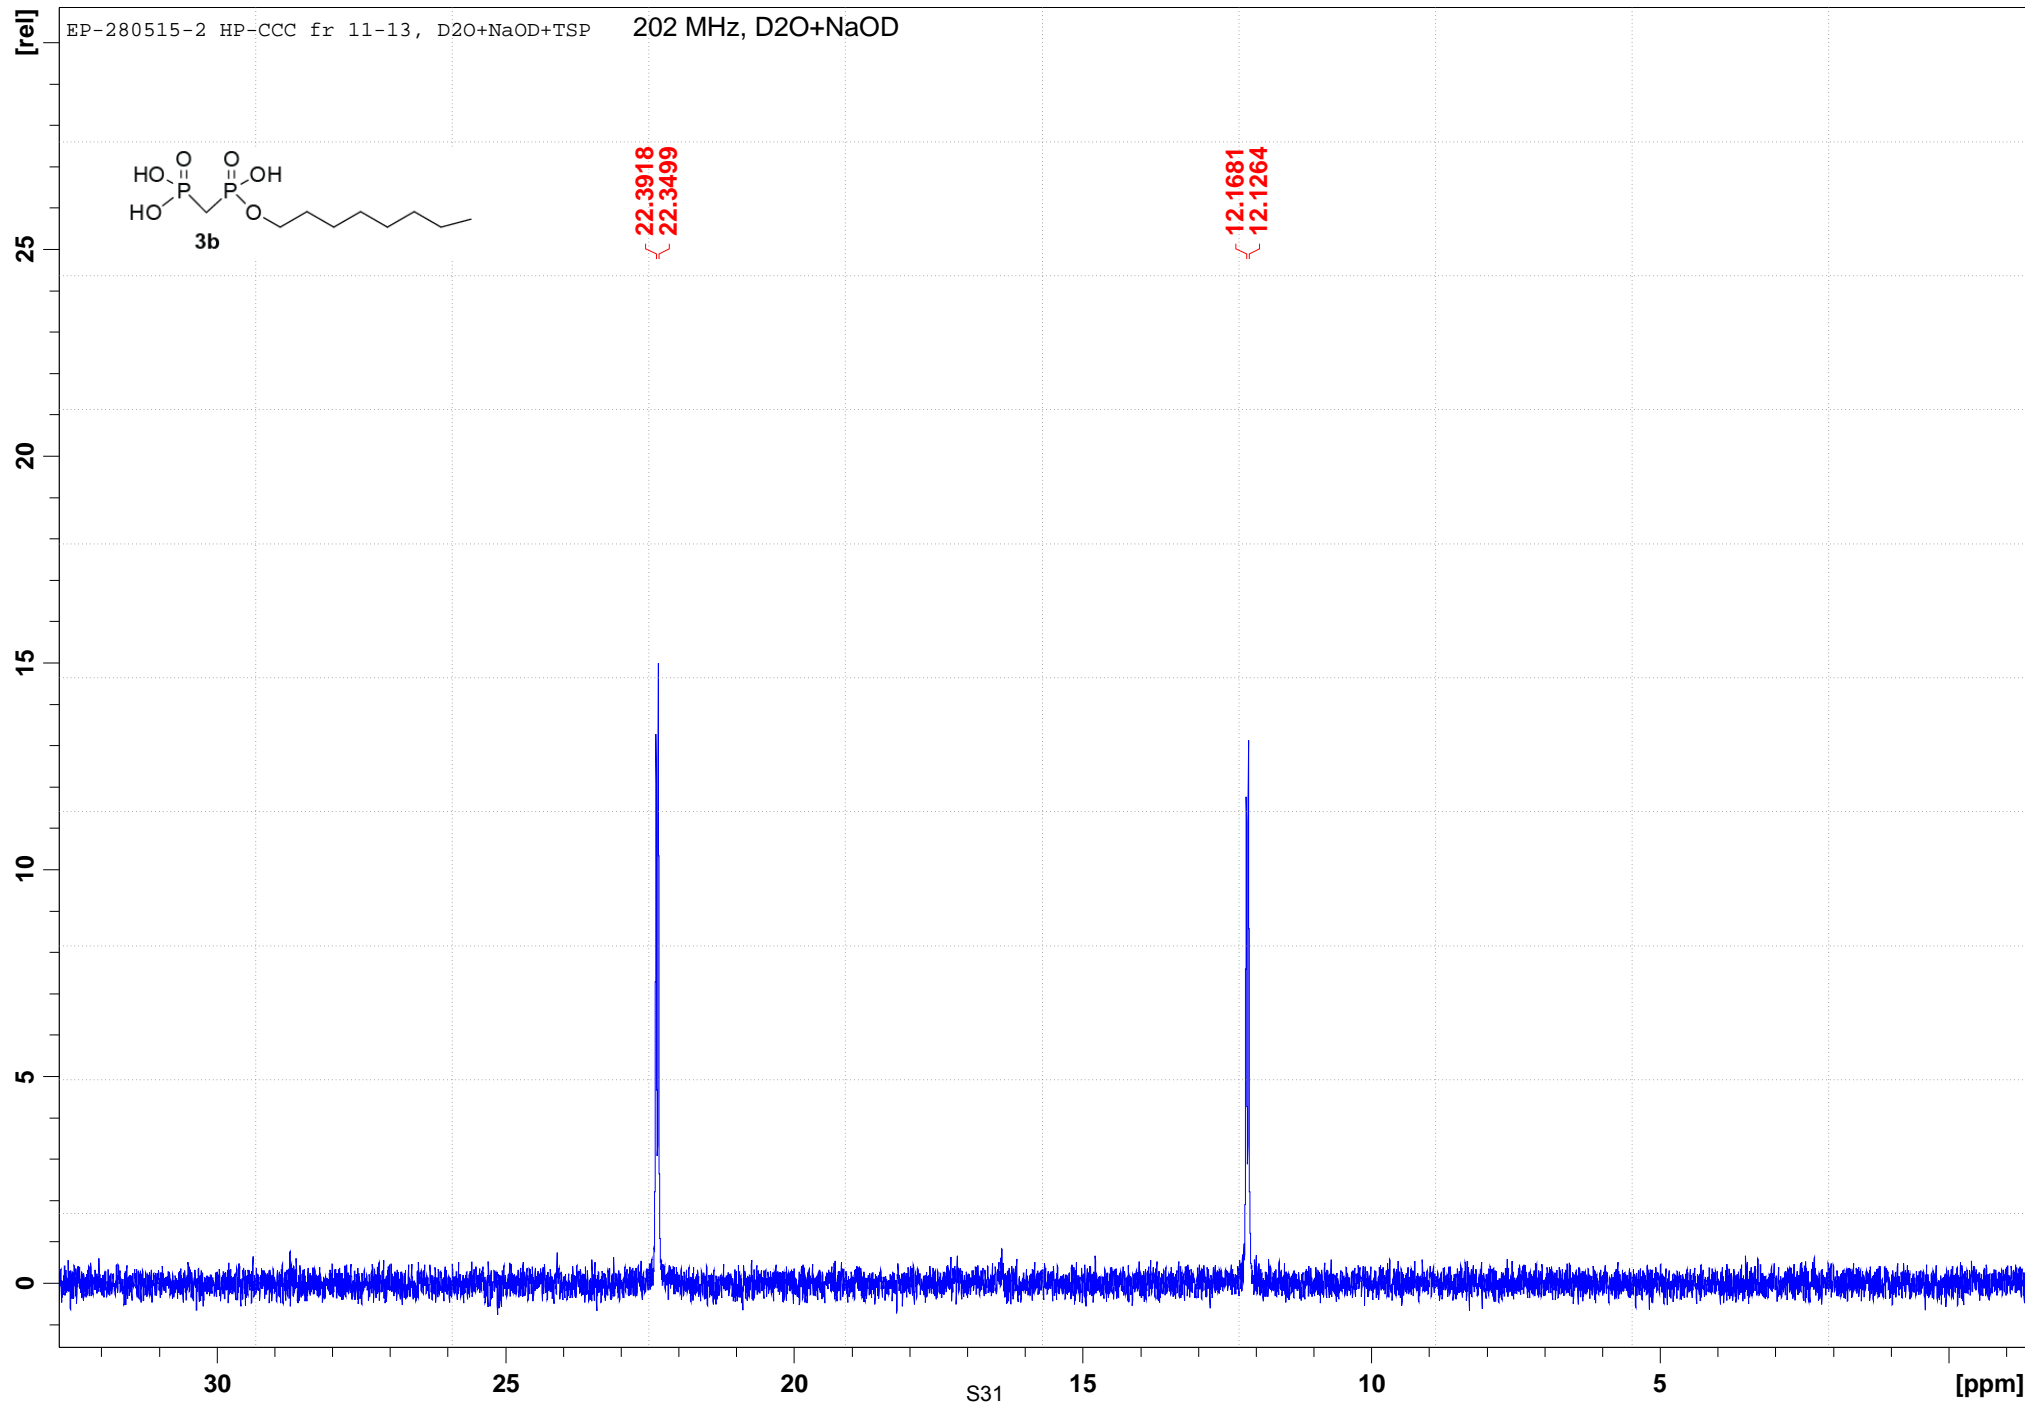

EP-051114-1 10 1 "E:\NMR 2015"

EP-051114-1 fr 6, D2O+NaOD 600 MHz, D2O+NaOD

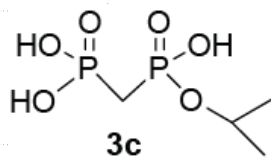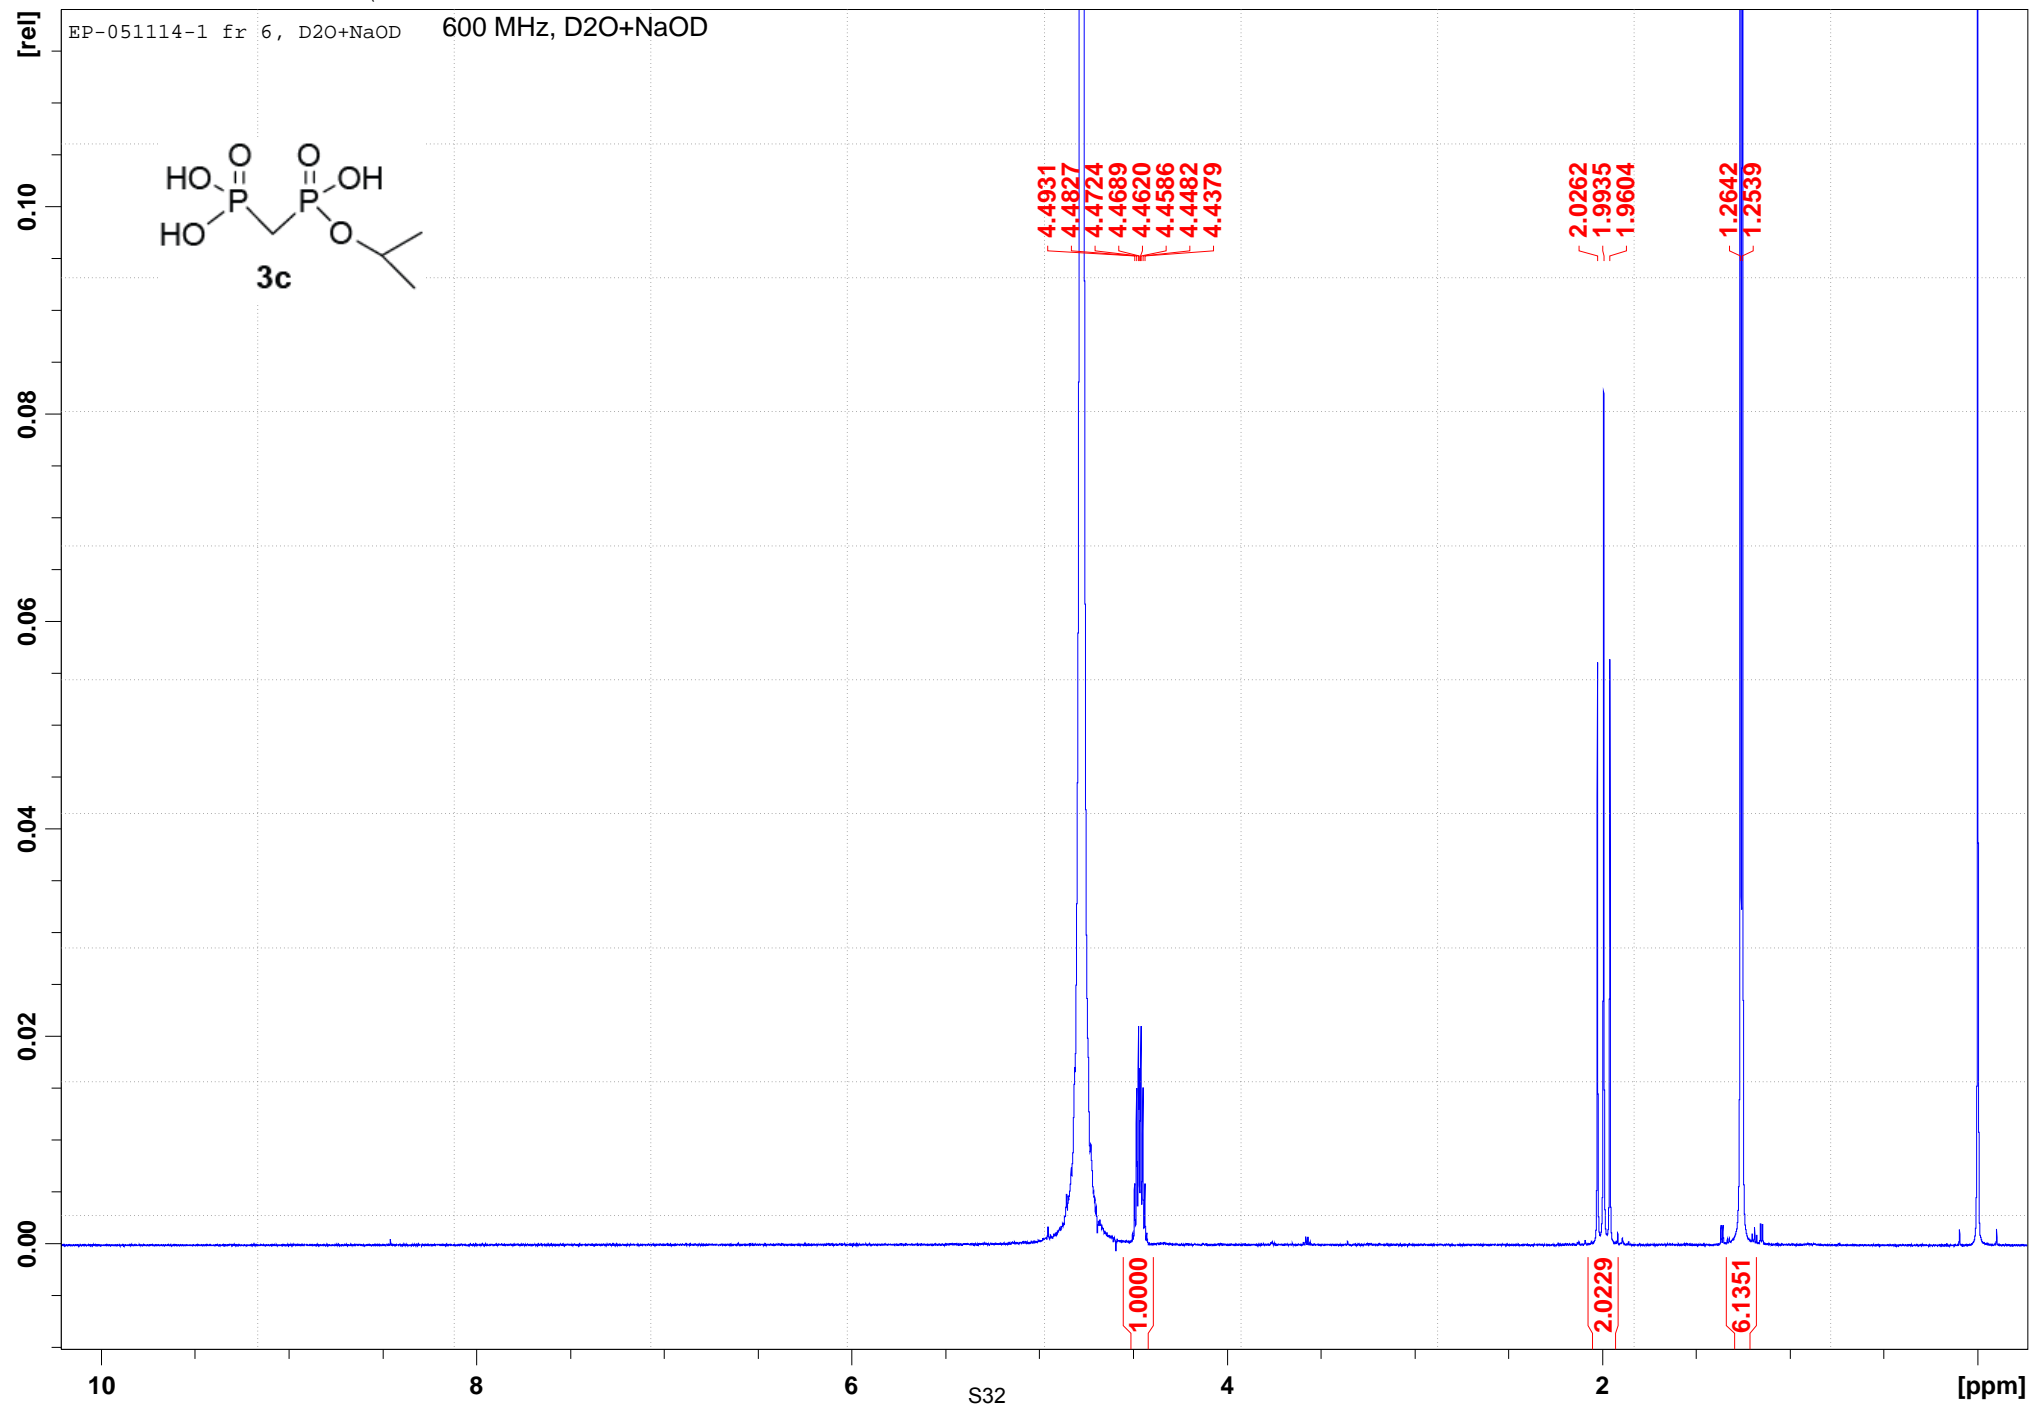



EP-051114-1 20 1 "E:\NMR 2015"

EP-051114-1 fr 6, D2O+NaOD 151 MHz, D2O+NaOD

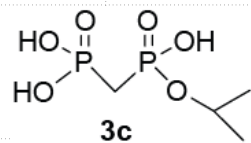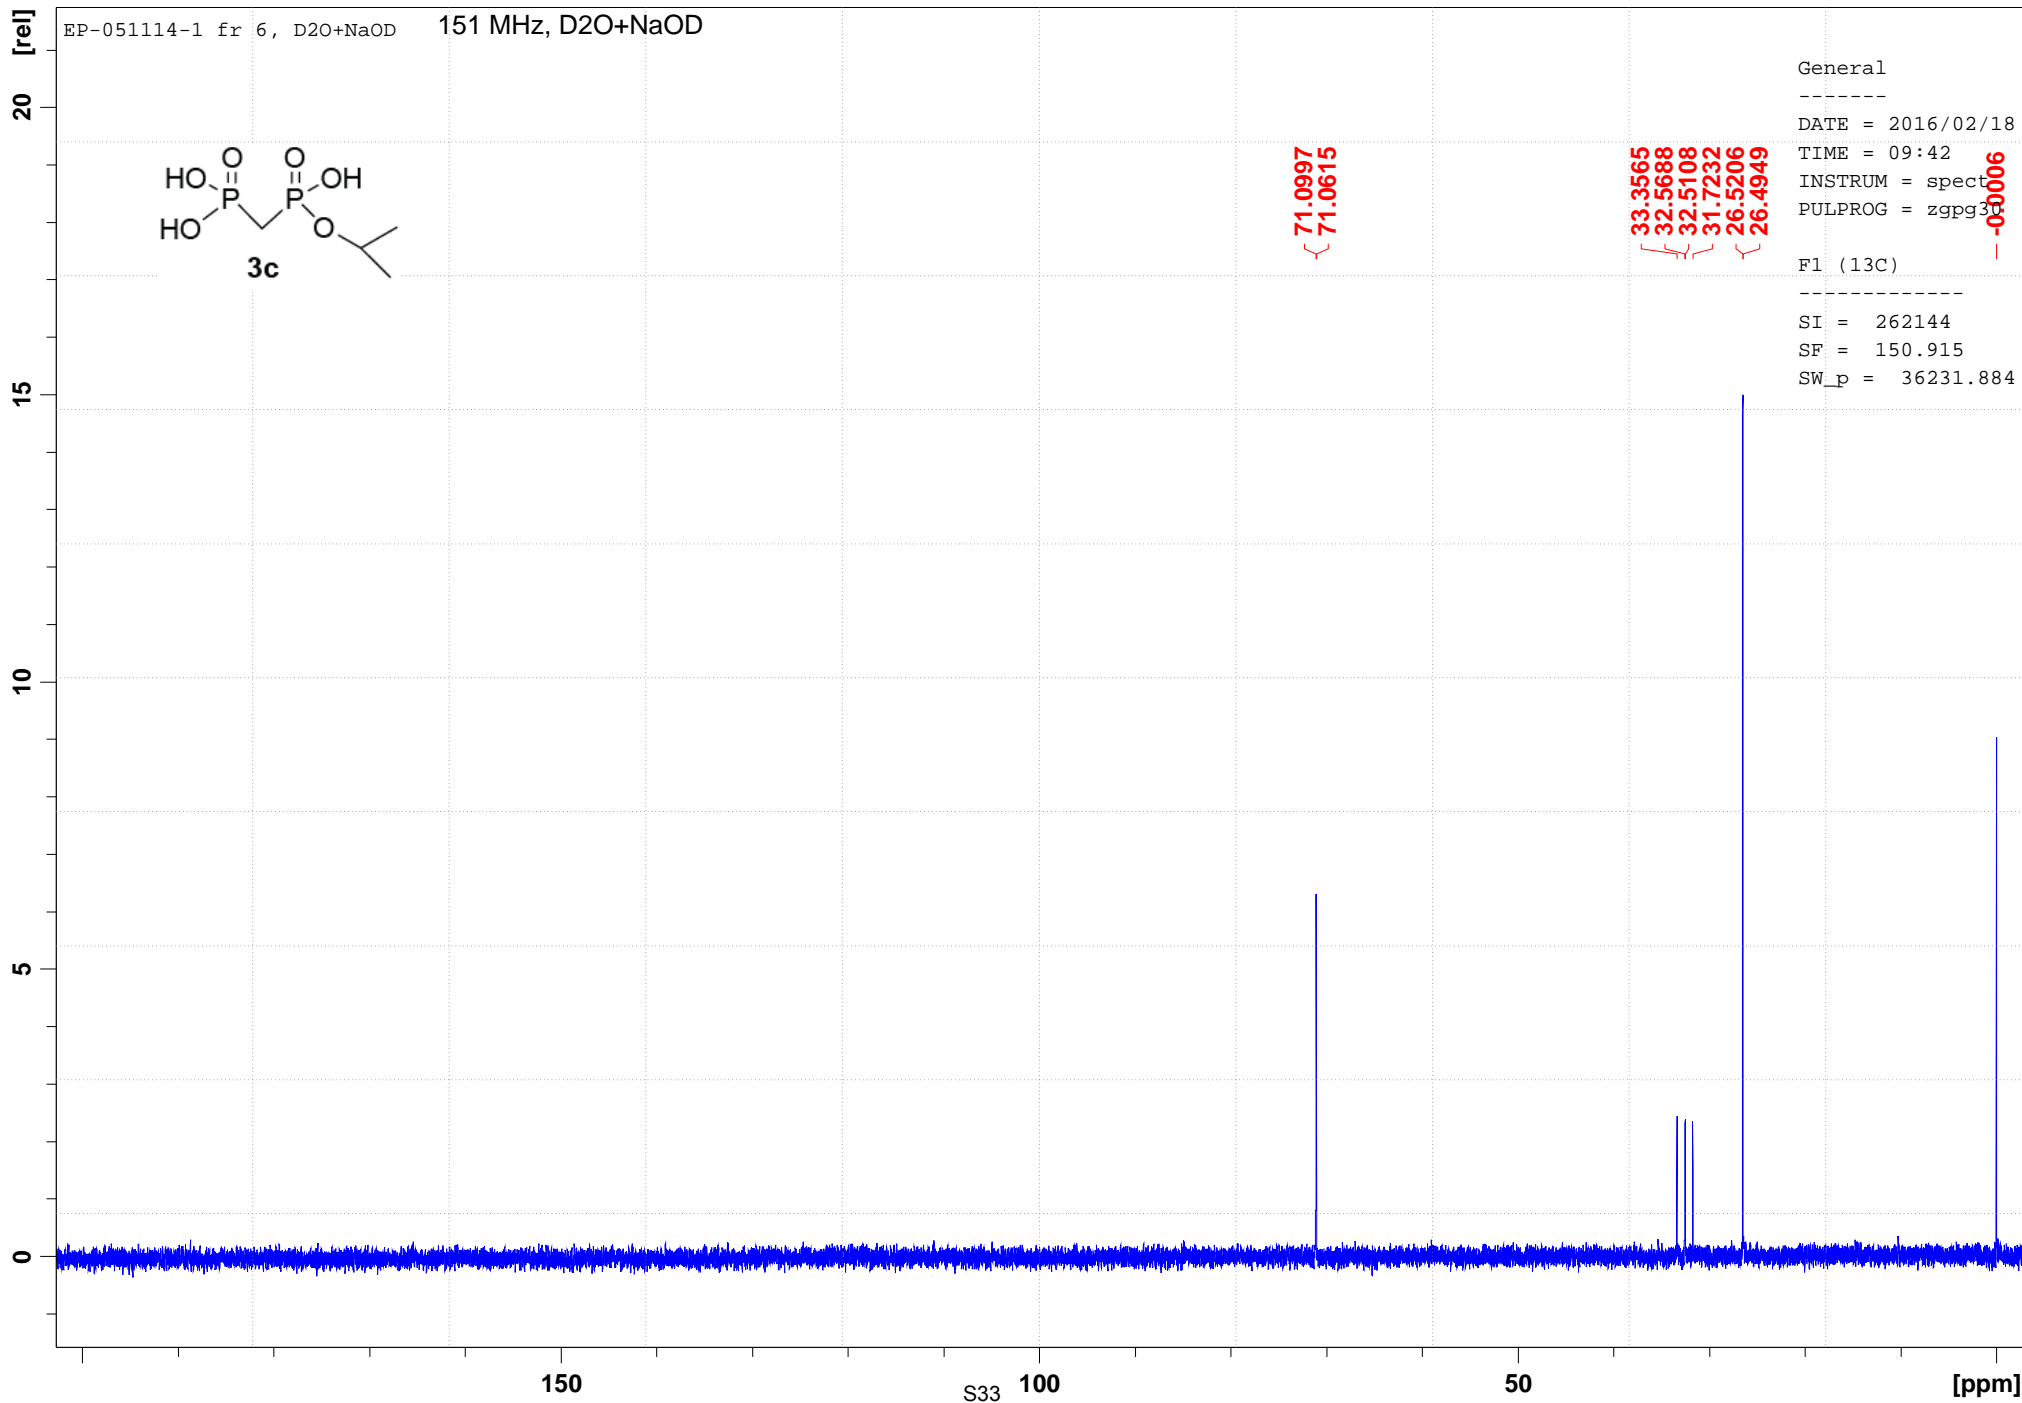

EP-051114-1 11 1 "E:\NMR 2015"

EP-051114-1 fr 6, D2O+NaOD 243 MHz, D2O+NaOD

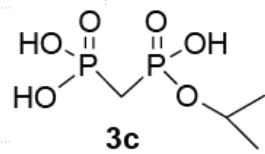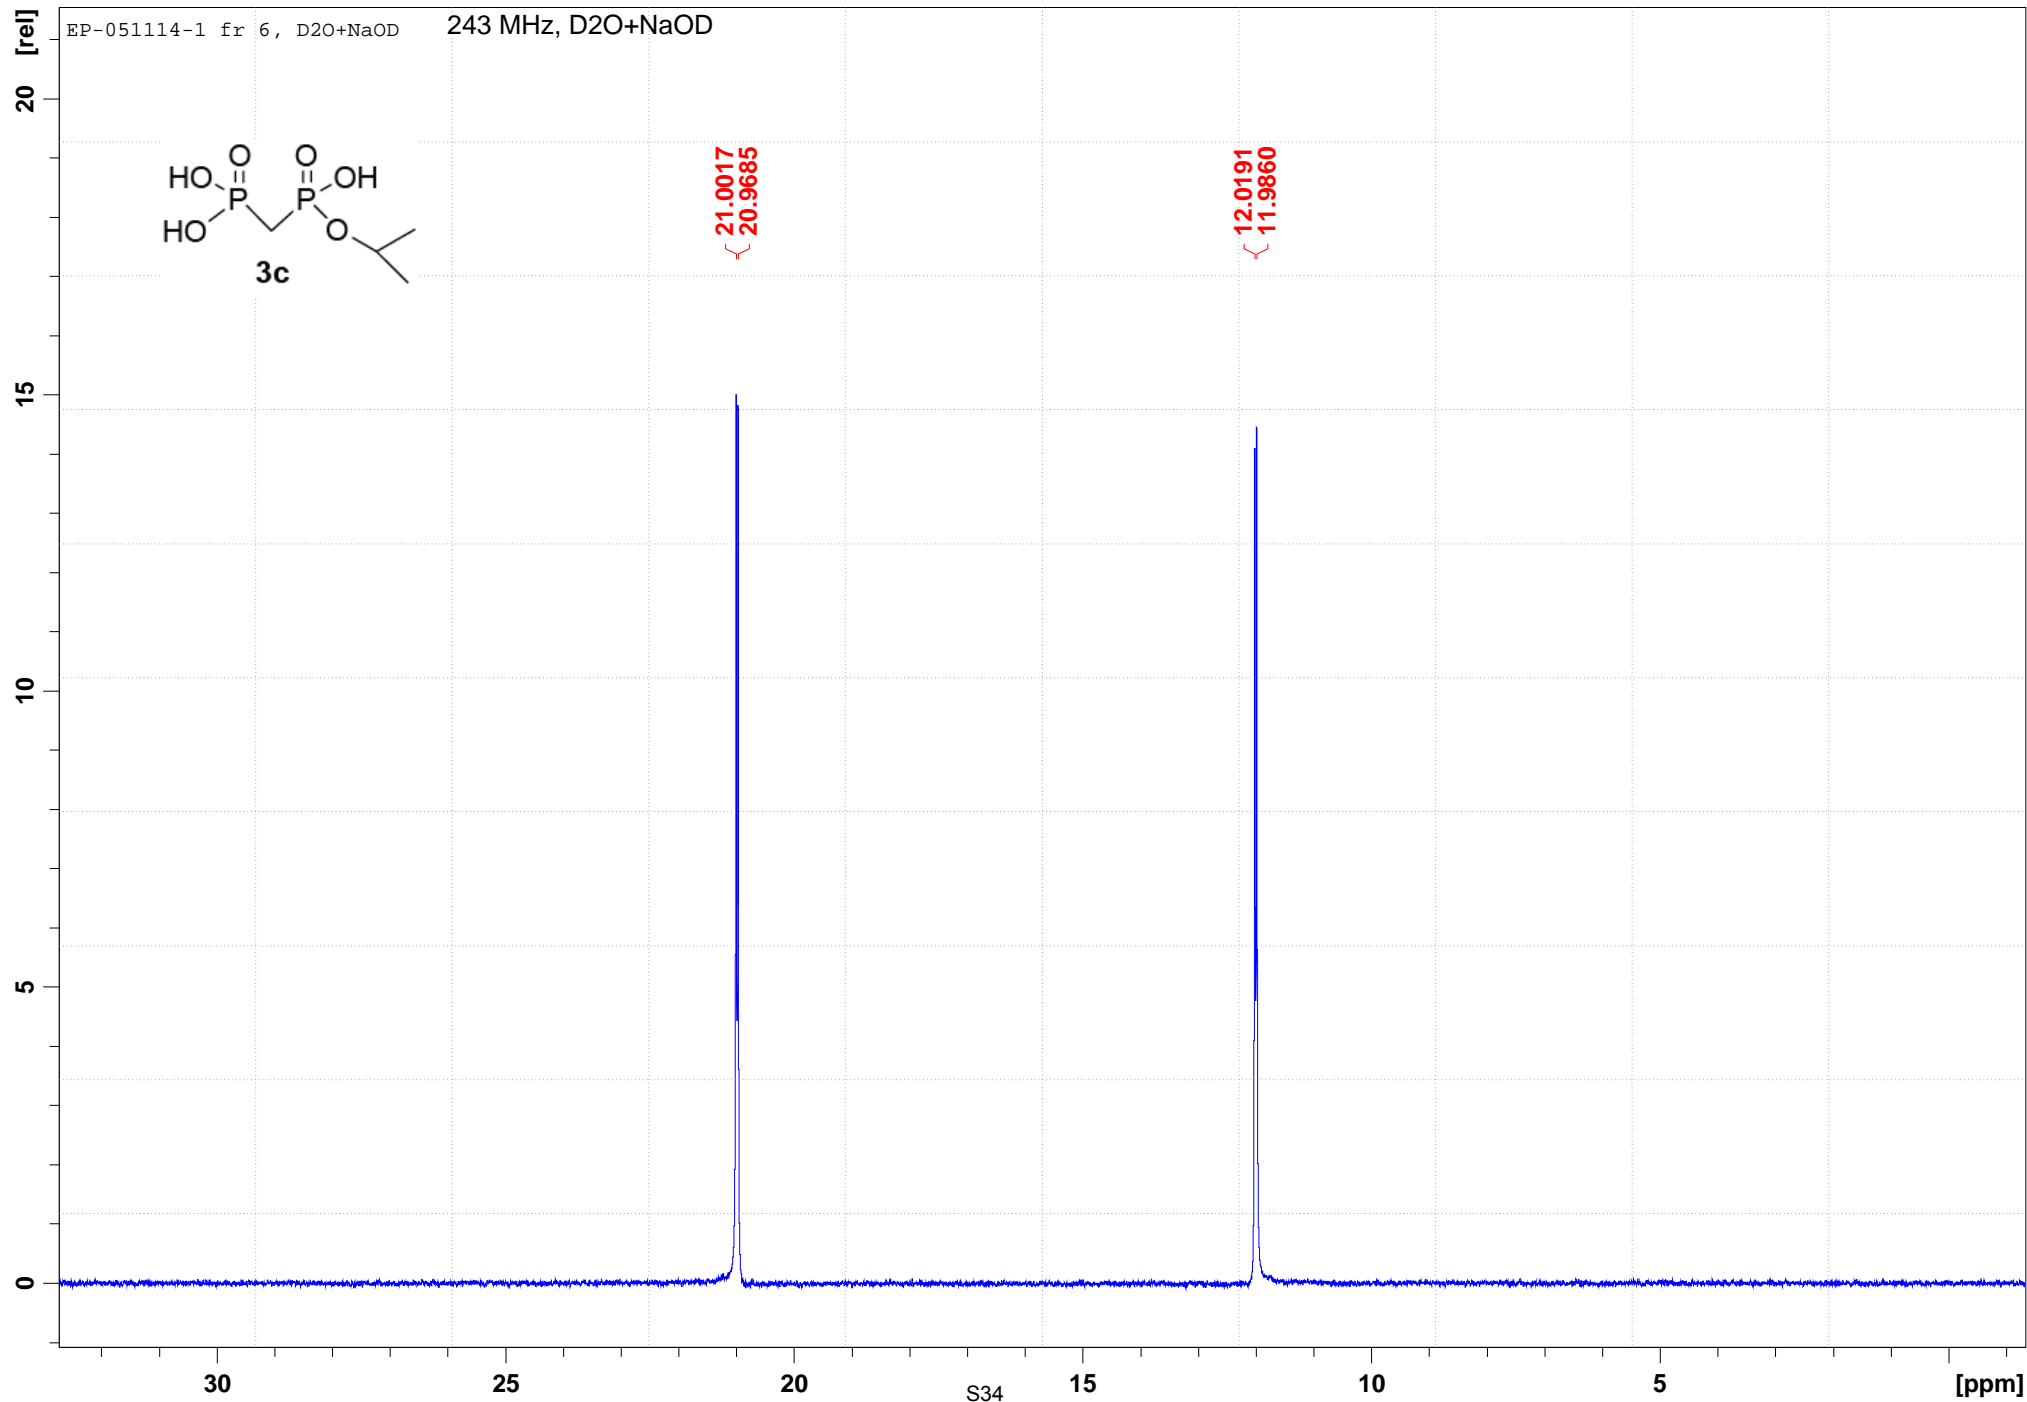

141027-1 31 1 "E:\NMR 2015"

EP-031214-1 HP-CCC ajettu 160 mg, fr 12-15, D2O+ NaOD 500 MHz, D2O+NaOD

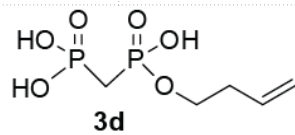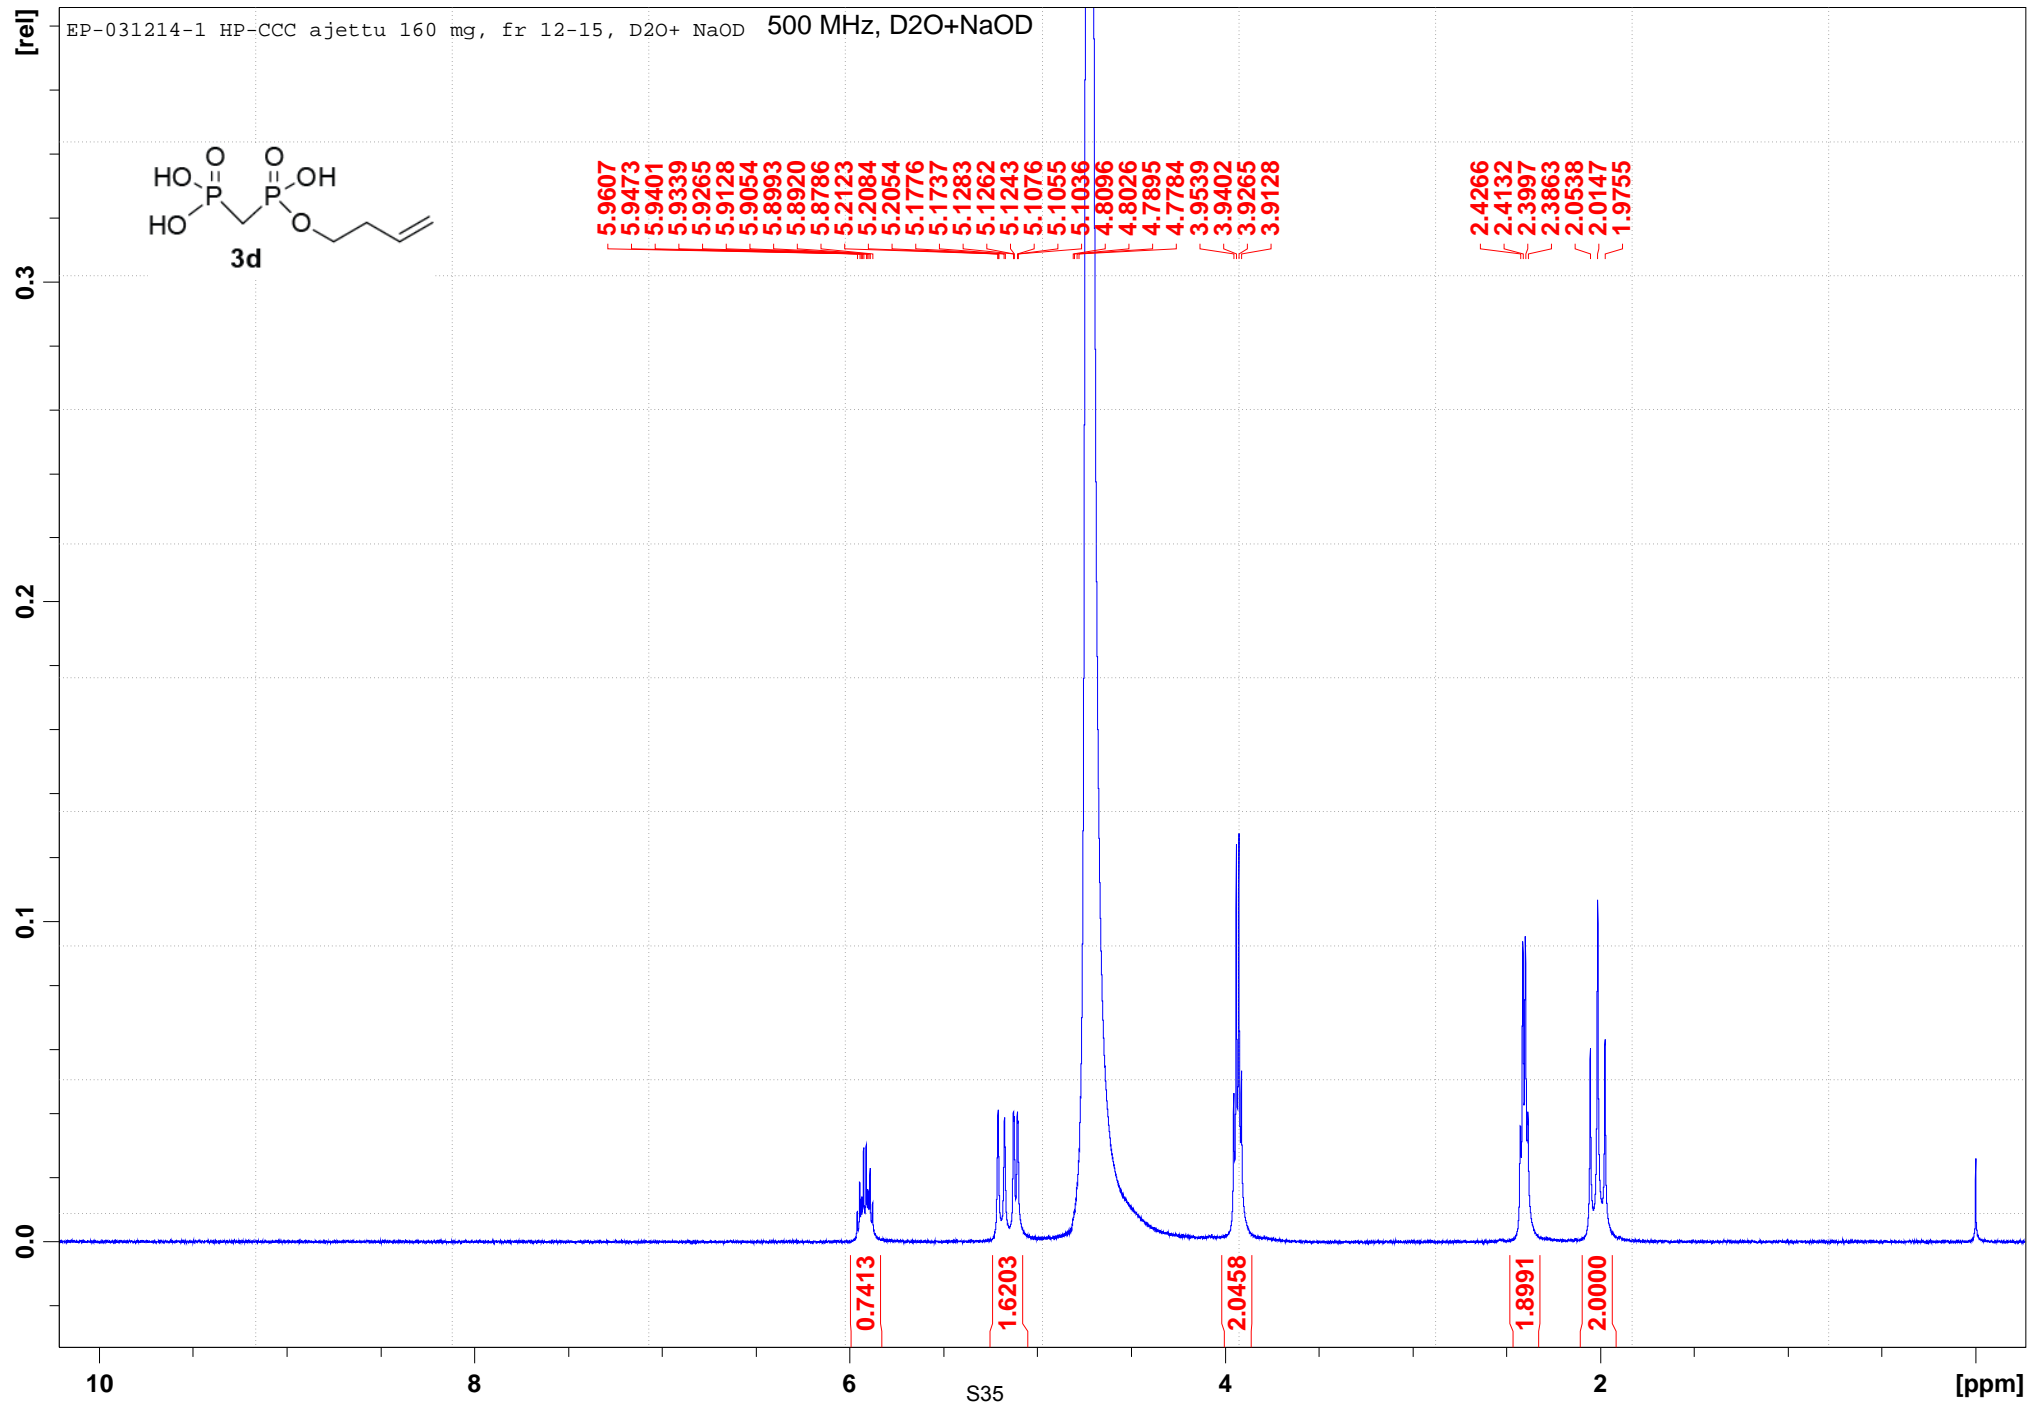

141027-1 36 1 "E:\NMR 2015"

EP-031214-1 HP-CCC ajettu 160 mg, fr 12-15, D2O+ NaOD 126 MHz, D2O+NaOD

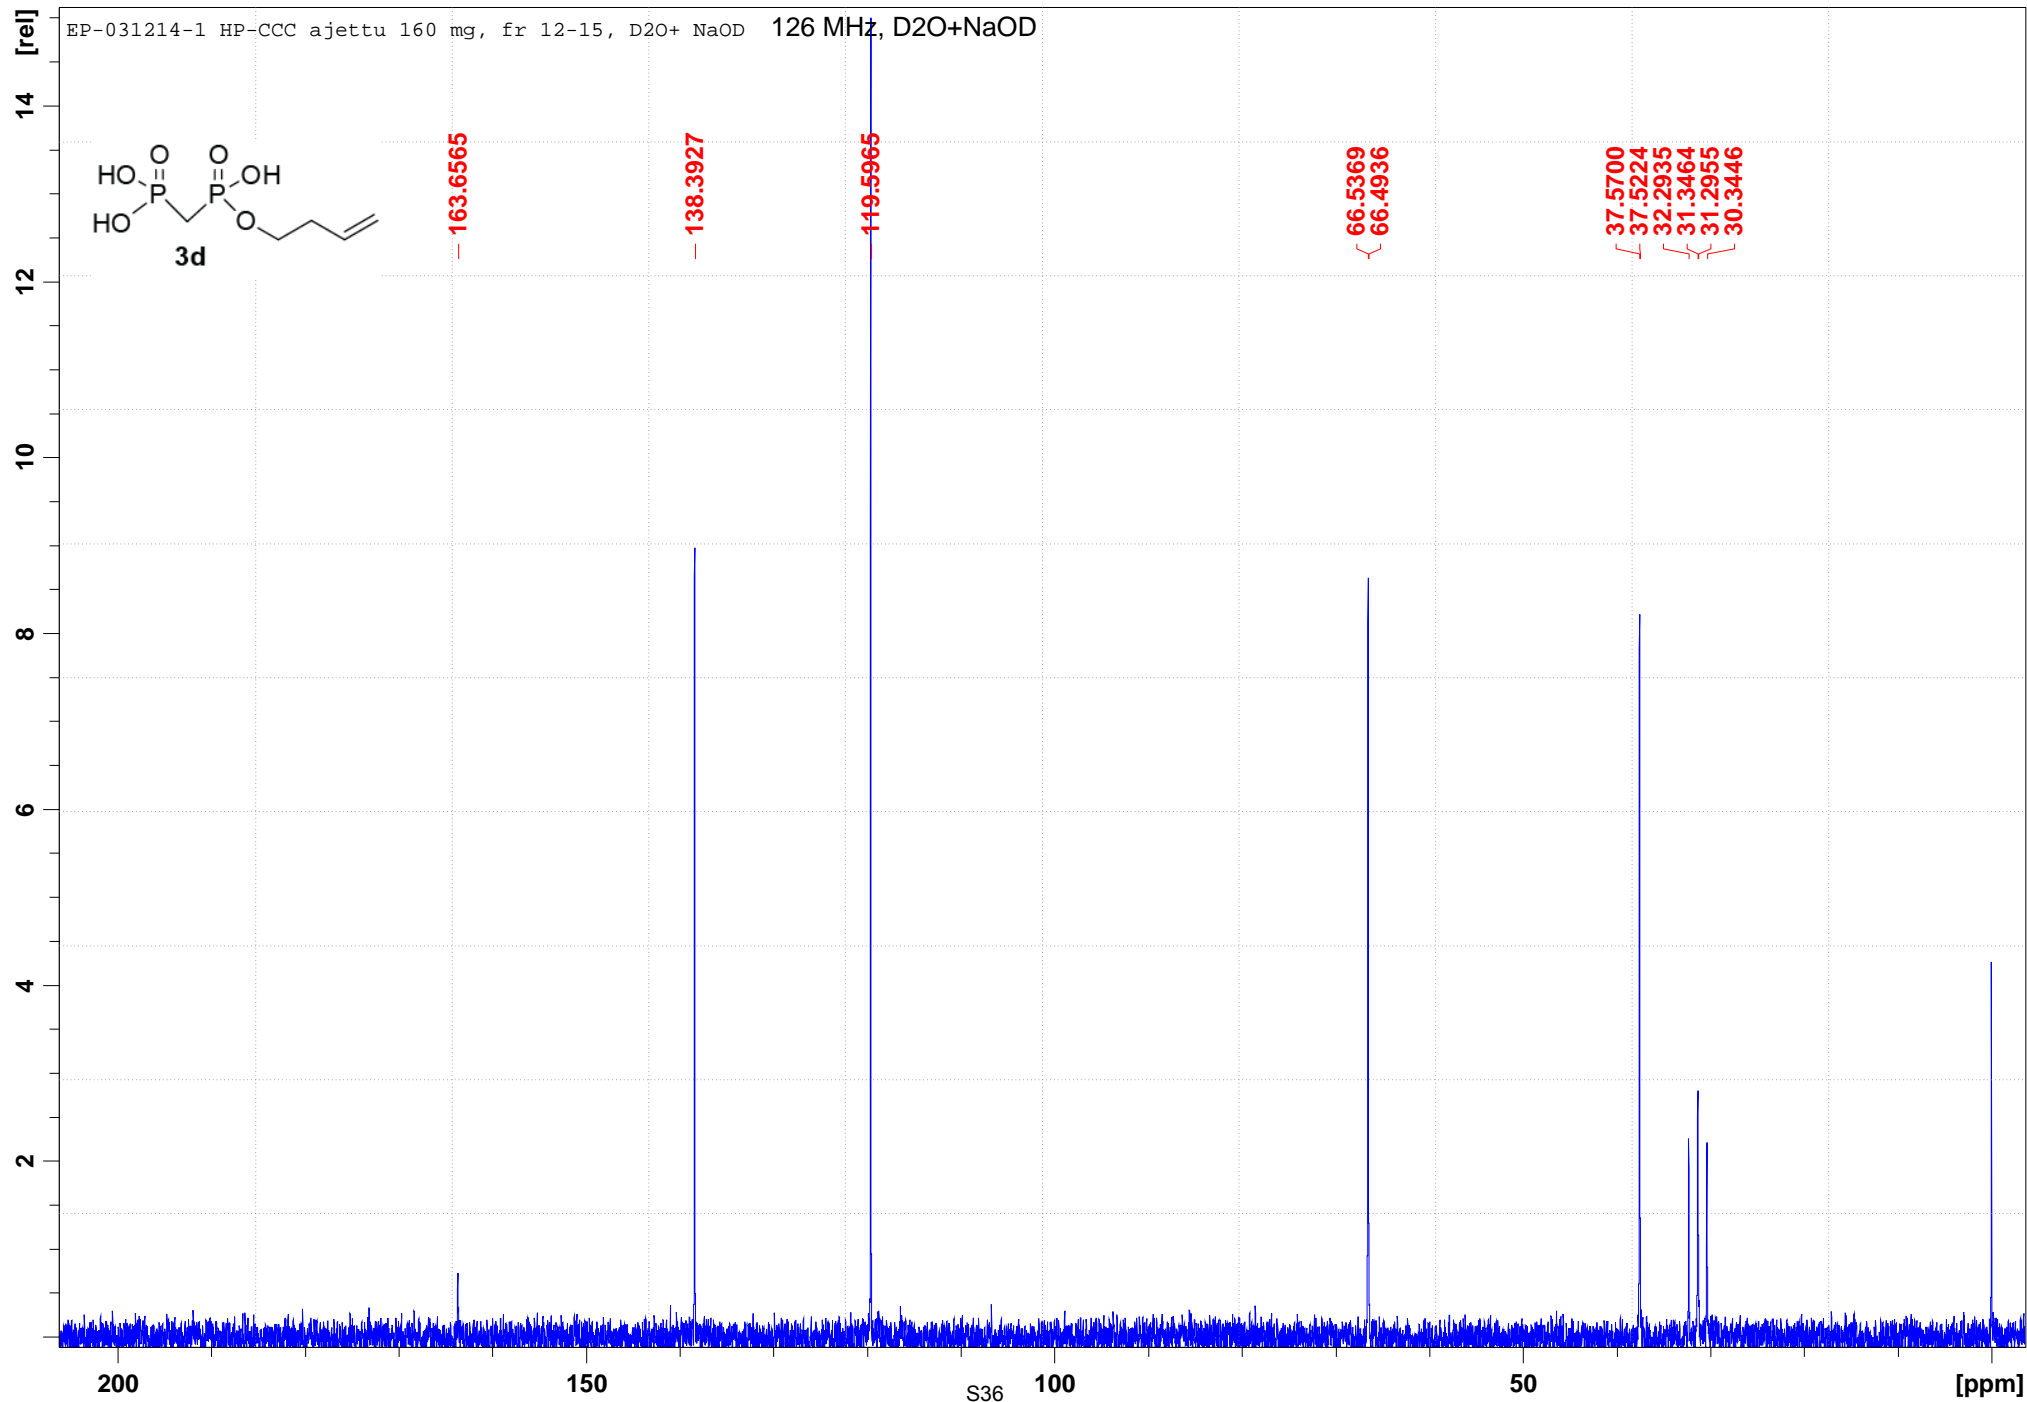

141203-1 122 1 "E:\NMR 2015"

EP-031214-1 HP-CCC ajettu 160 mg, fr 12-15, D2O+ NaOD 202 MHz, D2O+NaOD

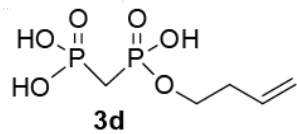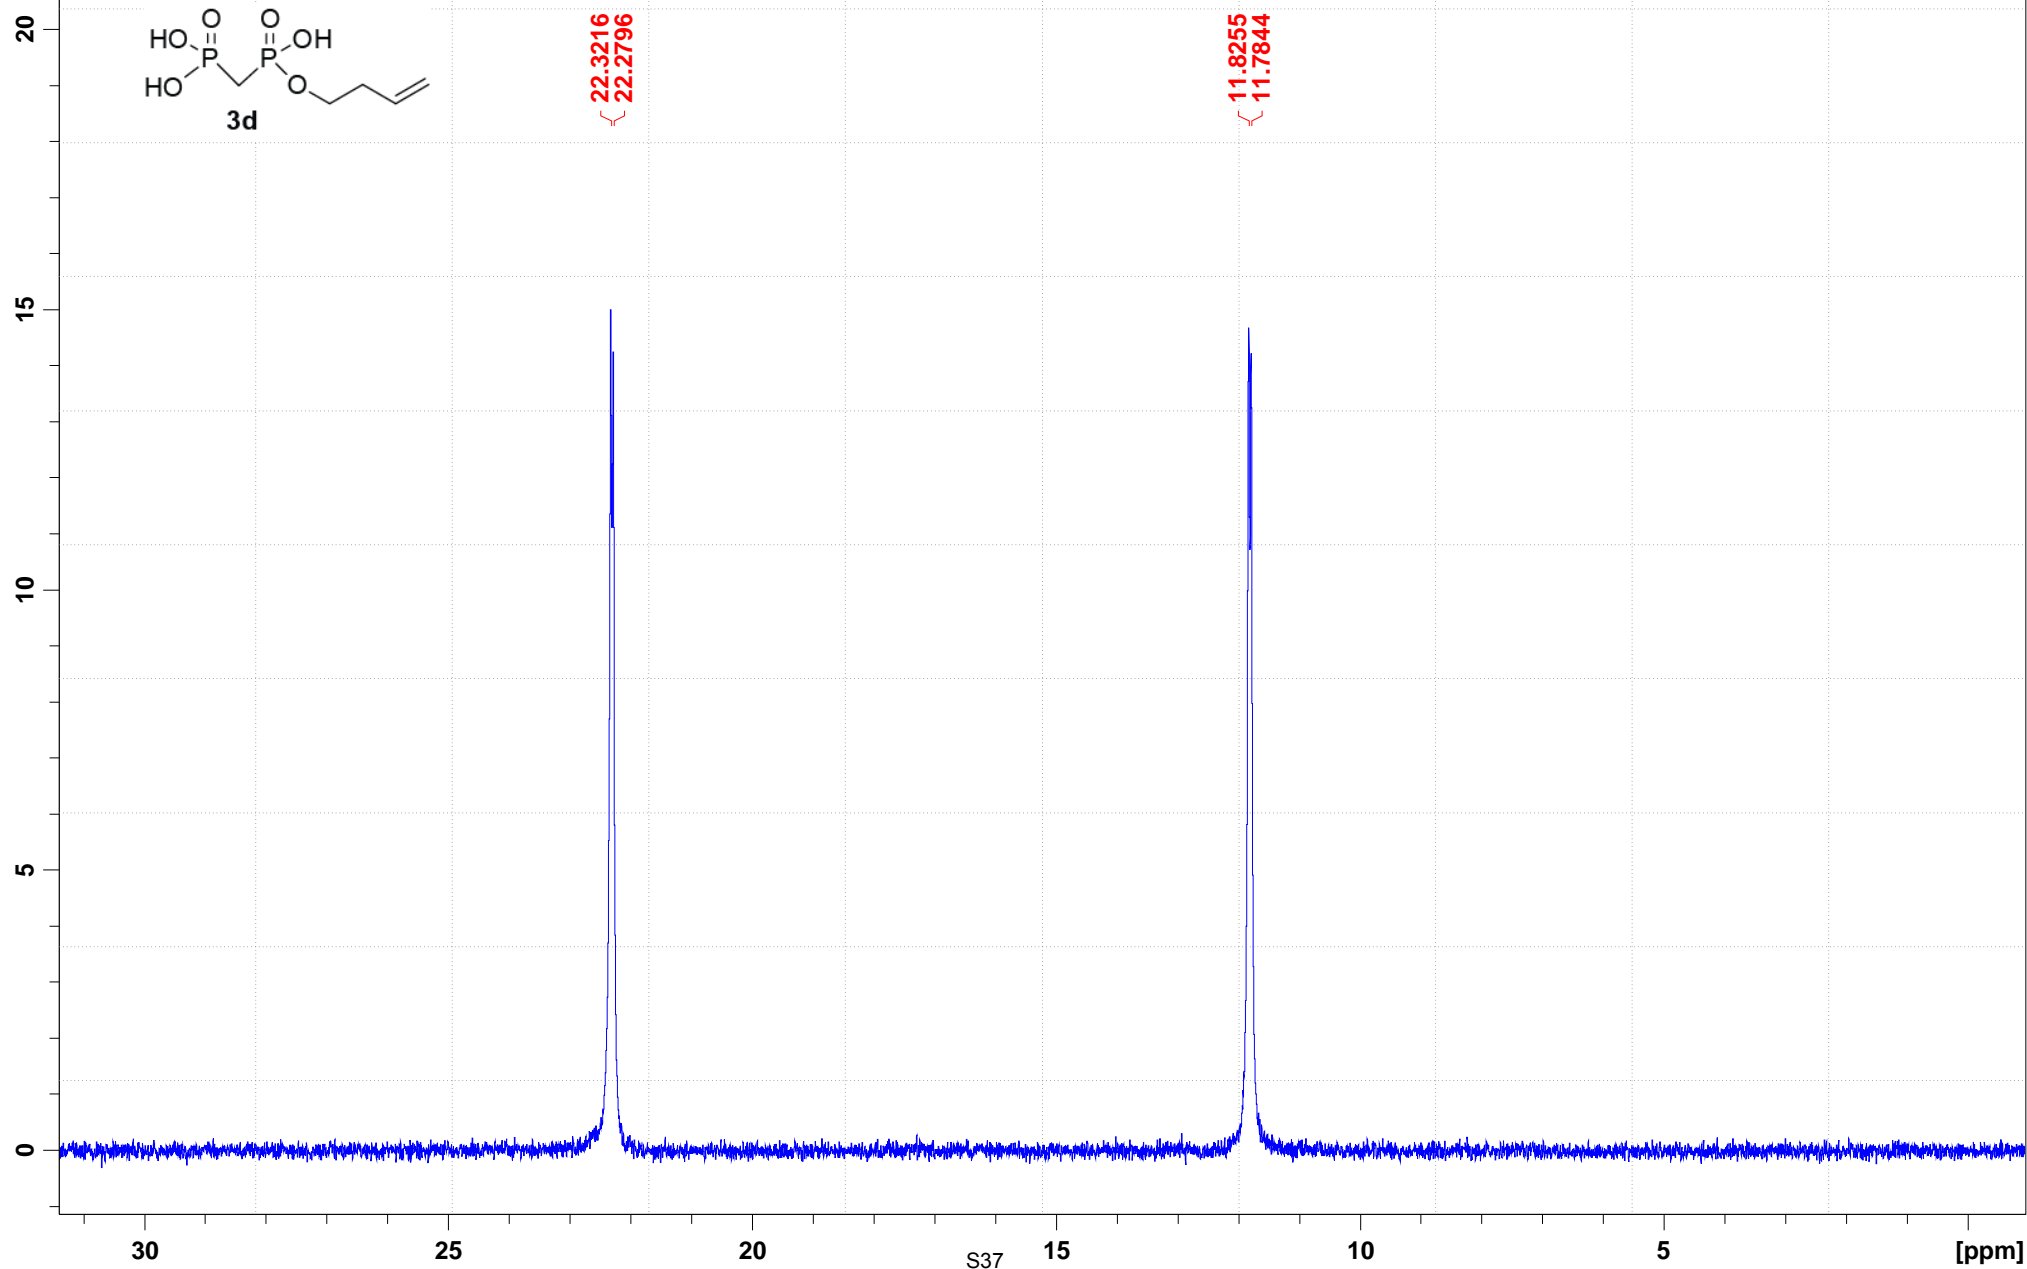

EP-271014-2 20 1 "E:\NMR 2015"

EP-271014-2 D2O 600 MHz, D2O

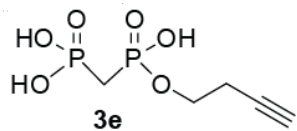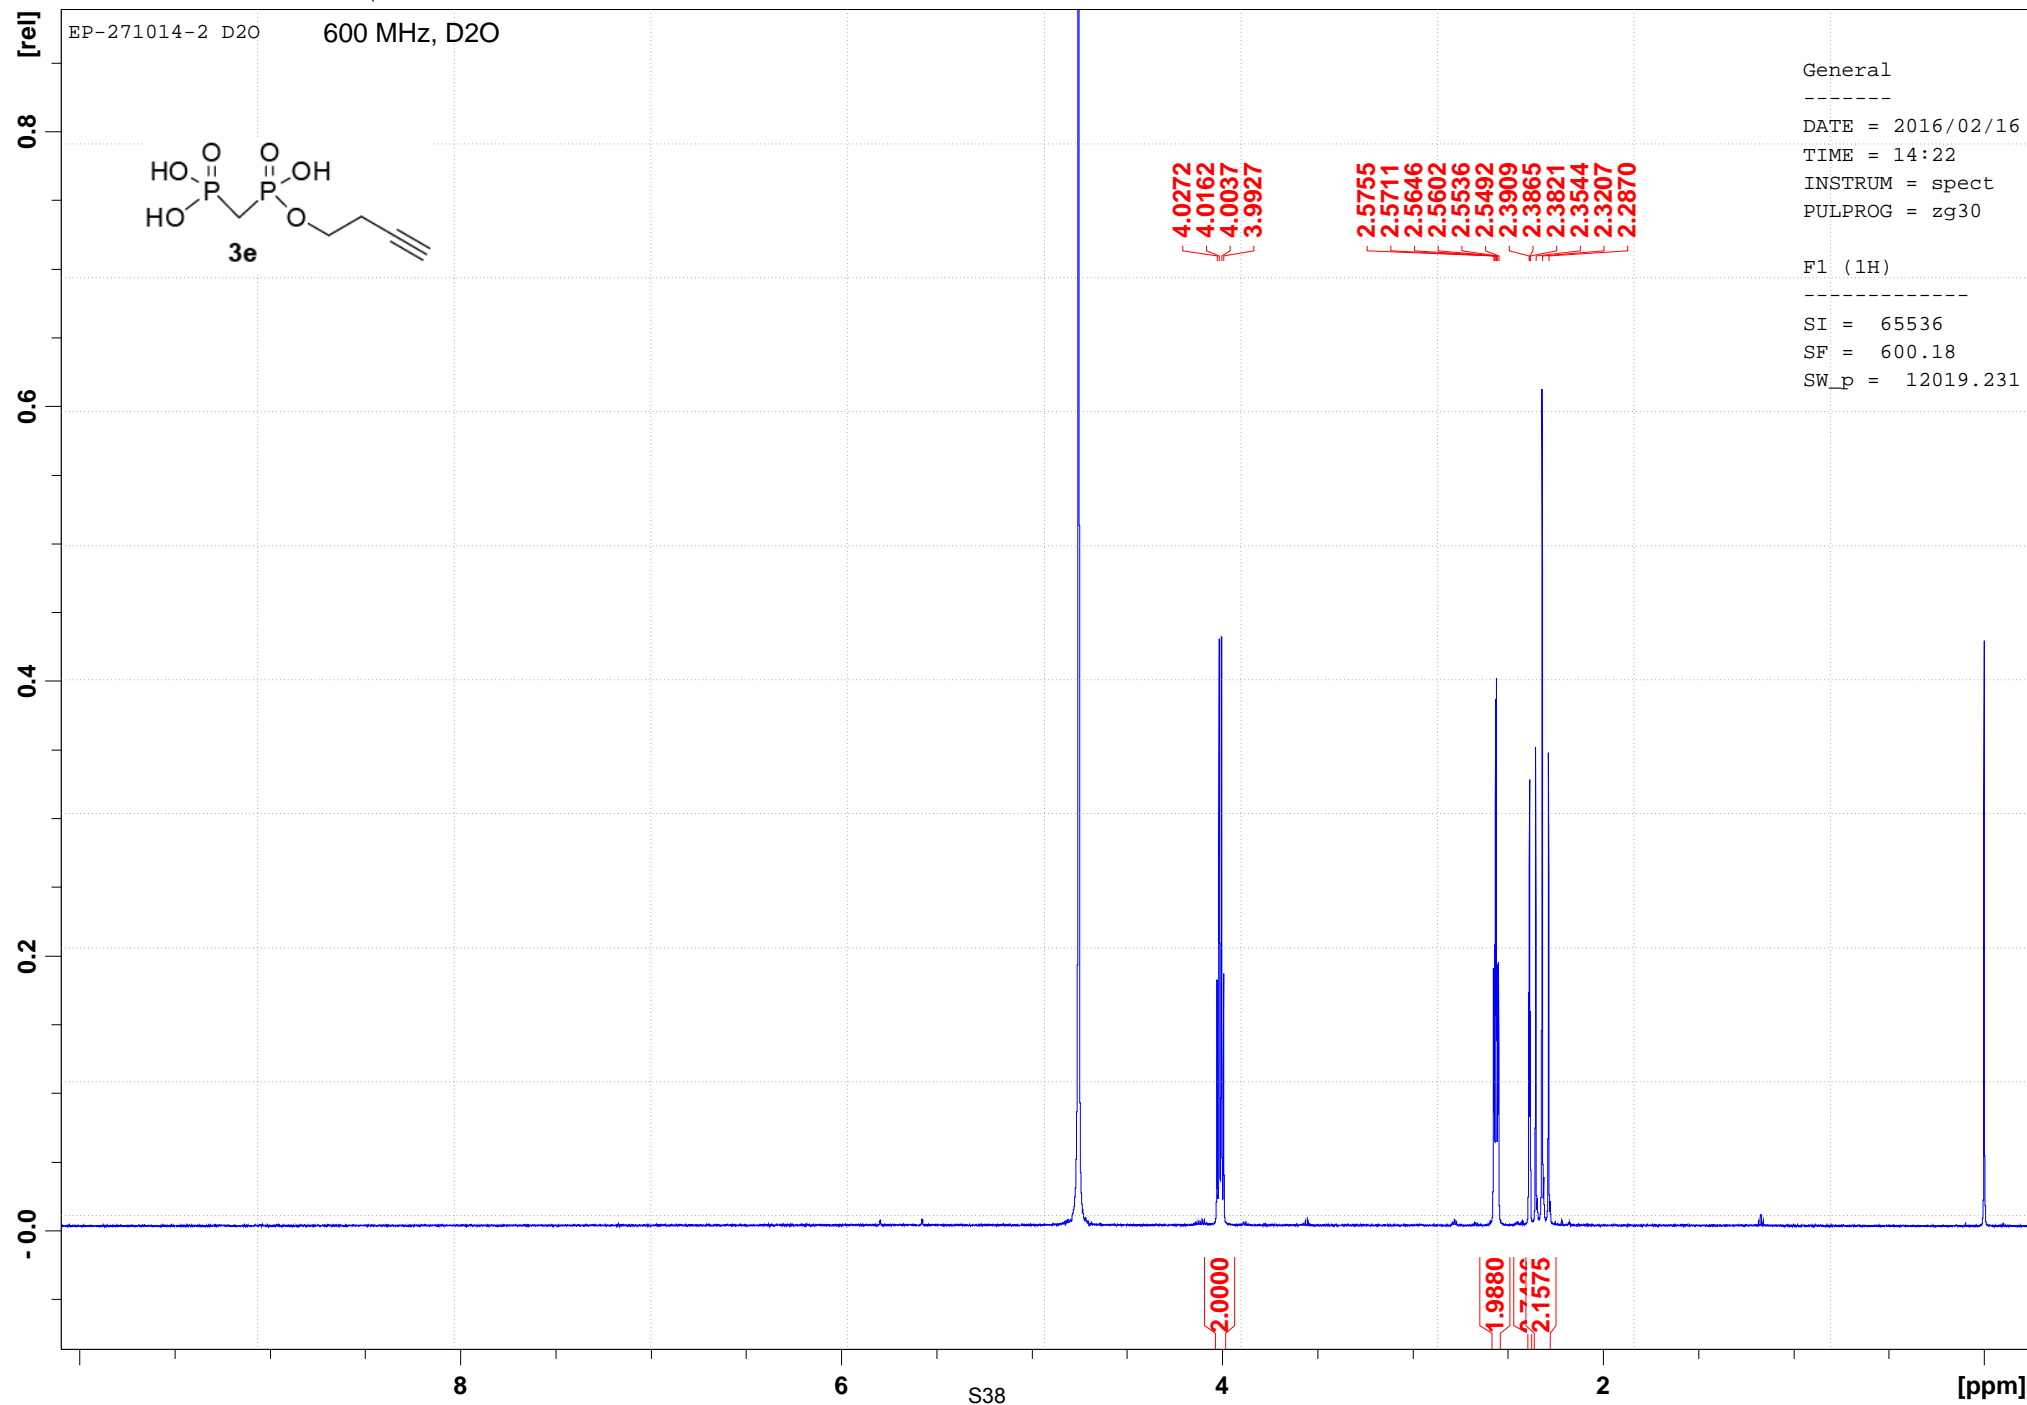

EP-271014-2 80 1 "E:\NMR 2015"

EP-271014-2 D2O 151 MHz, D2O

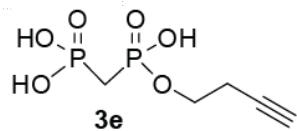

General

DATE = 2016/02/23

TIME = 23:41

INSTRUM = spect

PULPROG = zgpg3

F1 (13C)

SI = 262144

SF = 150.915

SW\_p = 36231.884

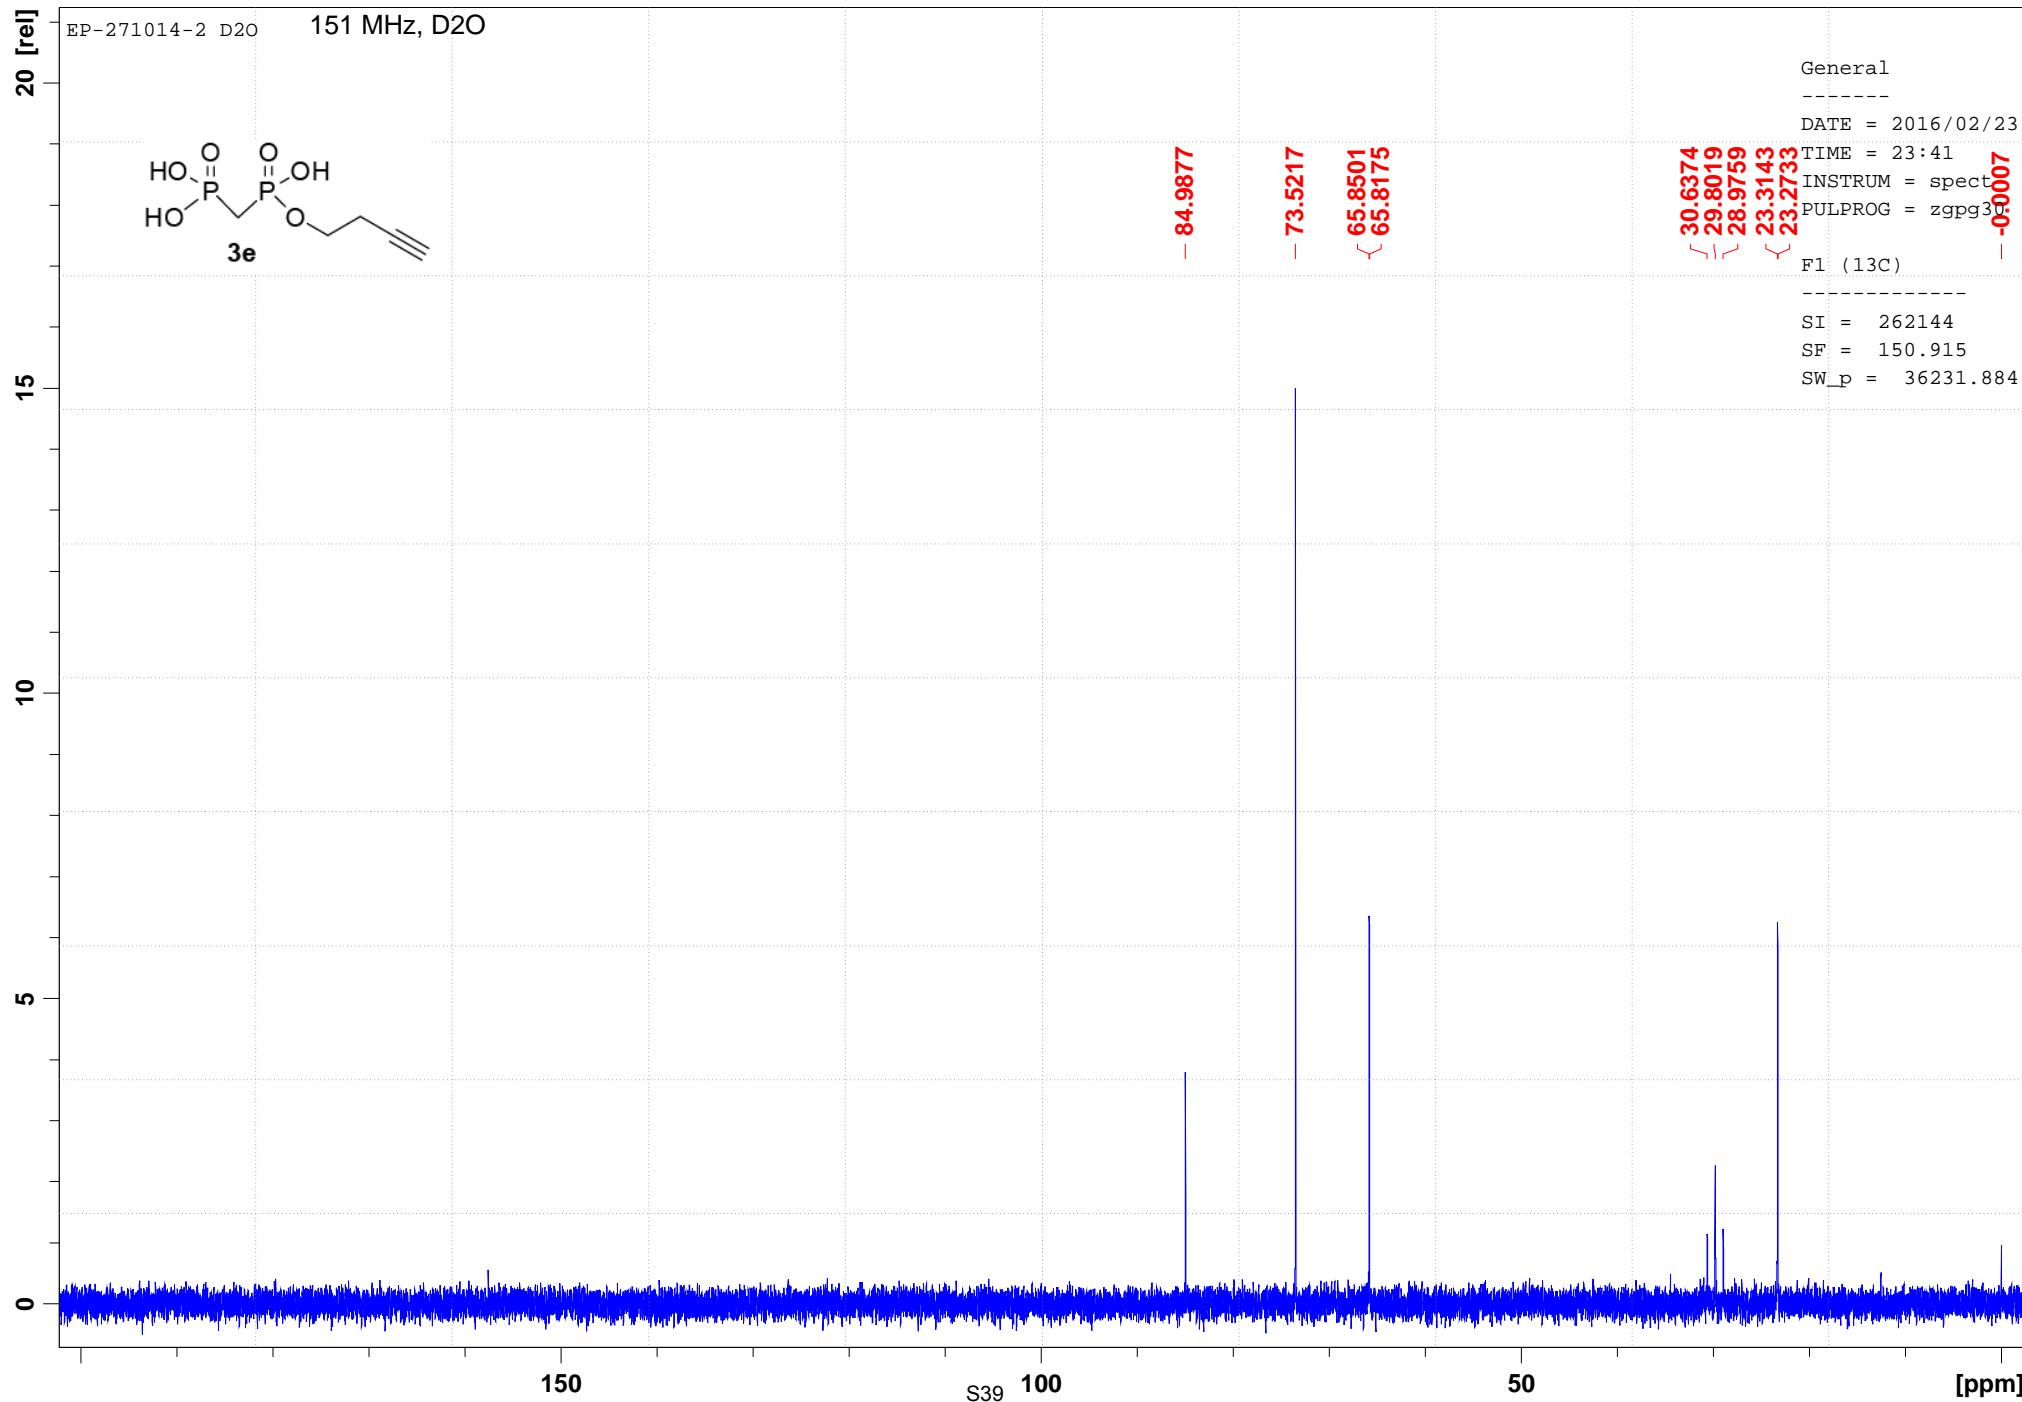

EP-271014-2 11 1 "E:\NMR 2015"

EP-271014-2 D2O+NaOD 243 MHz, D2O+NaOD

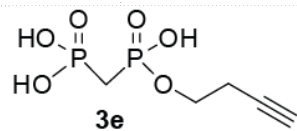

General

DATE = 2016/02/16

TIME = 13:24

INSTRUM = spect

PULPROG = zgpg30

F1 (31P)

SI = 262144

SF = 242.957

SW\_p = 59523.81

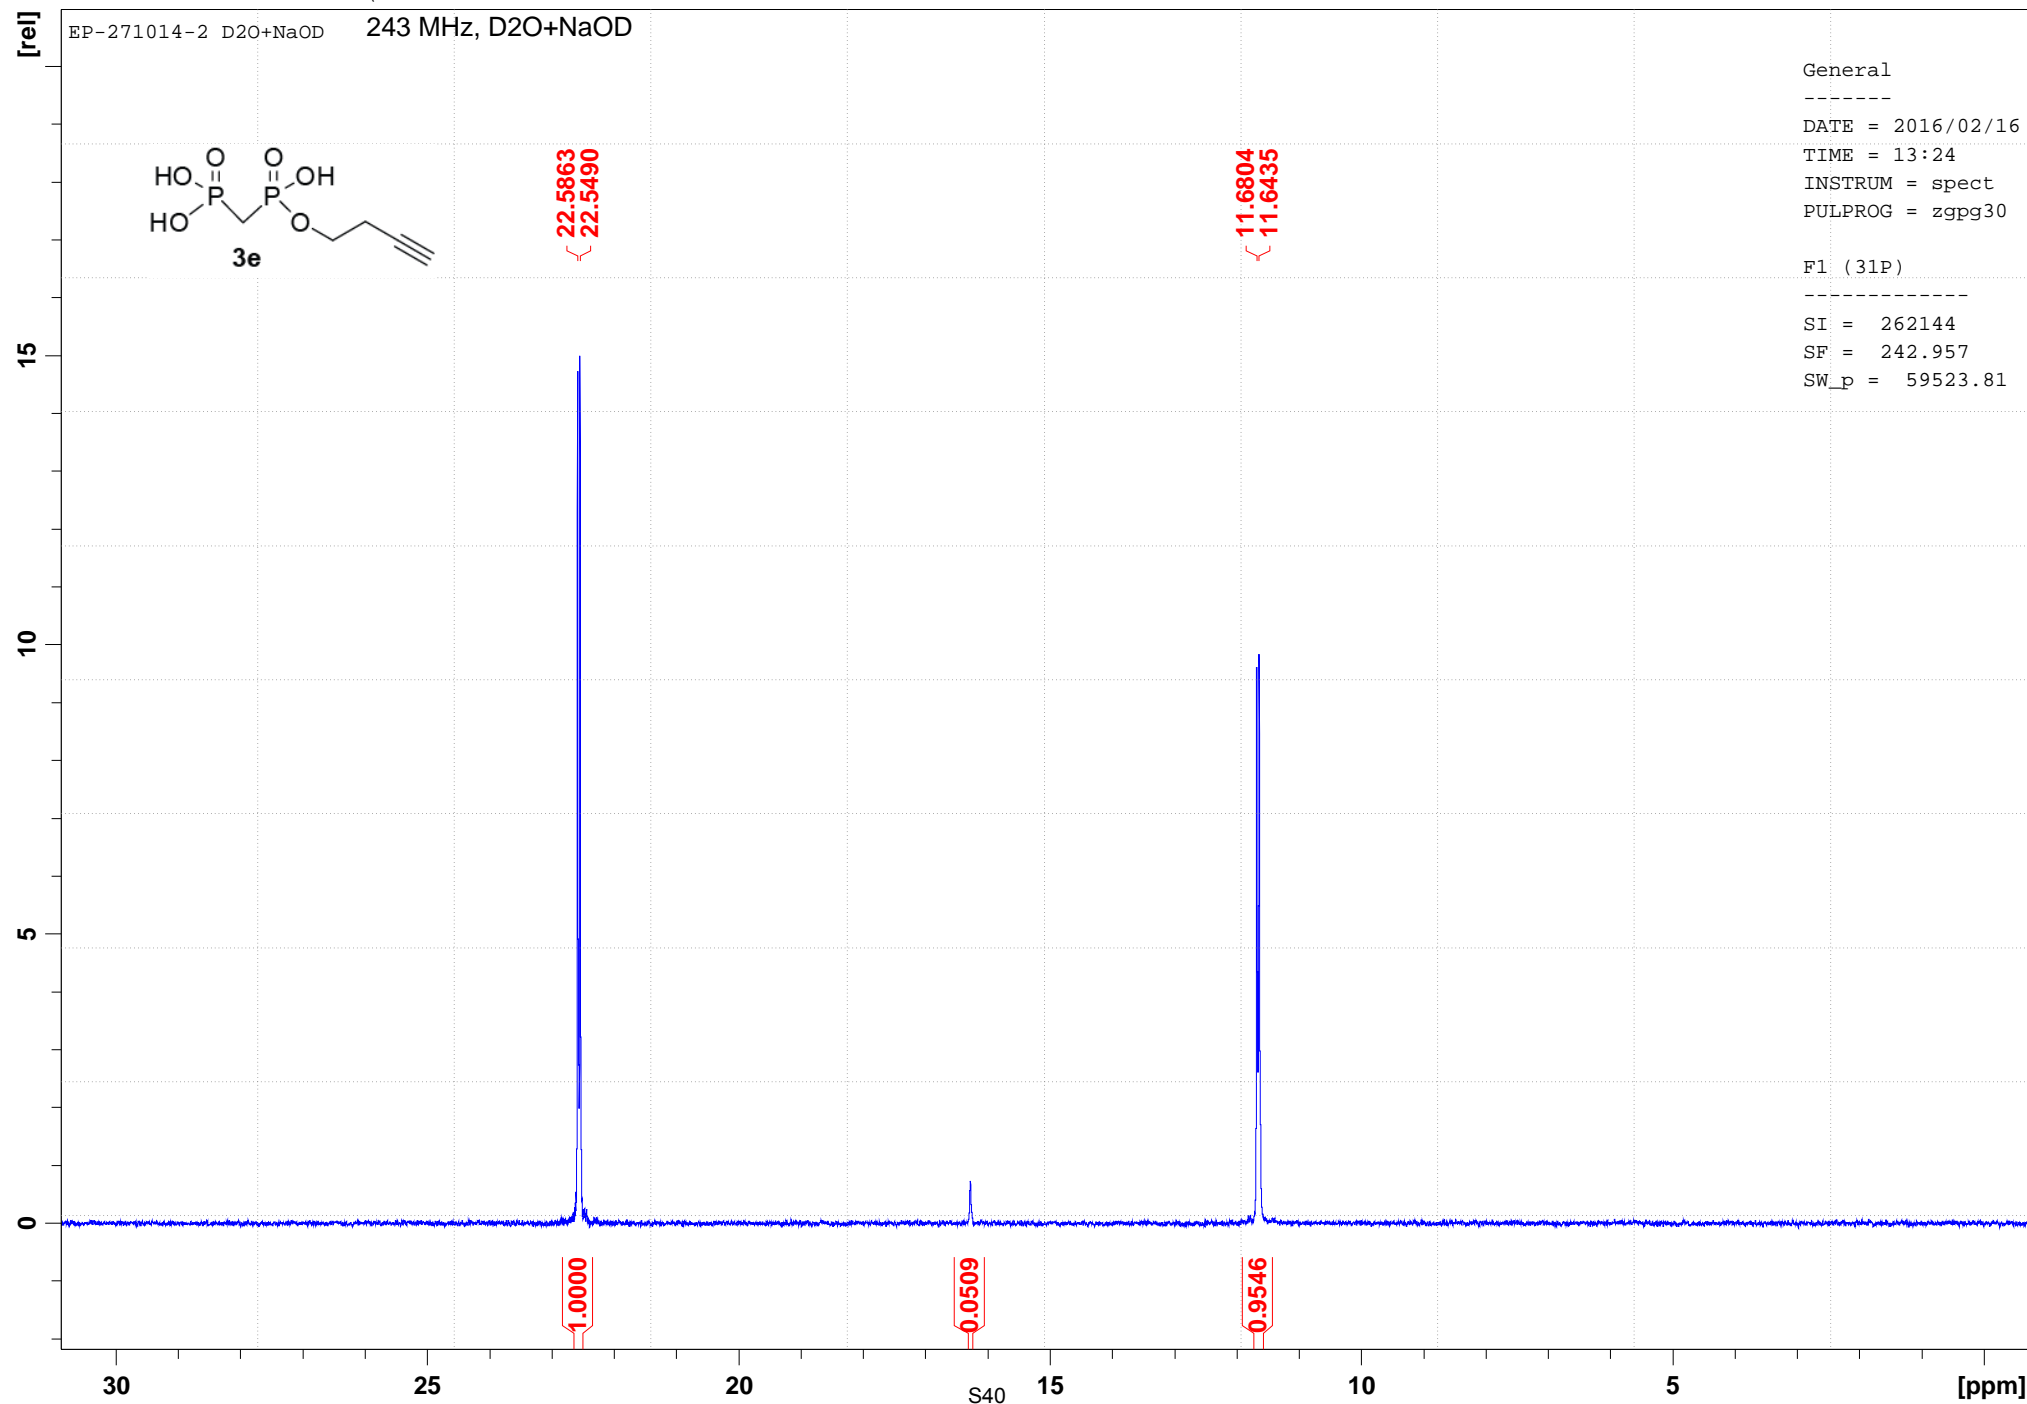



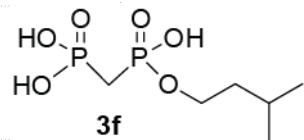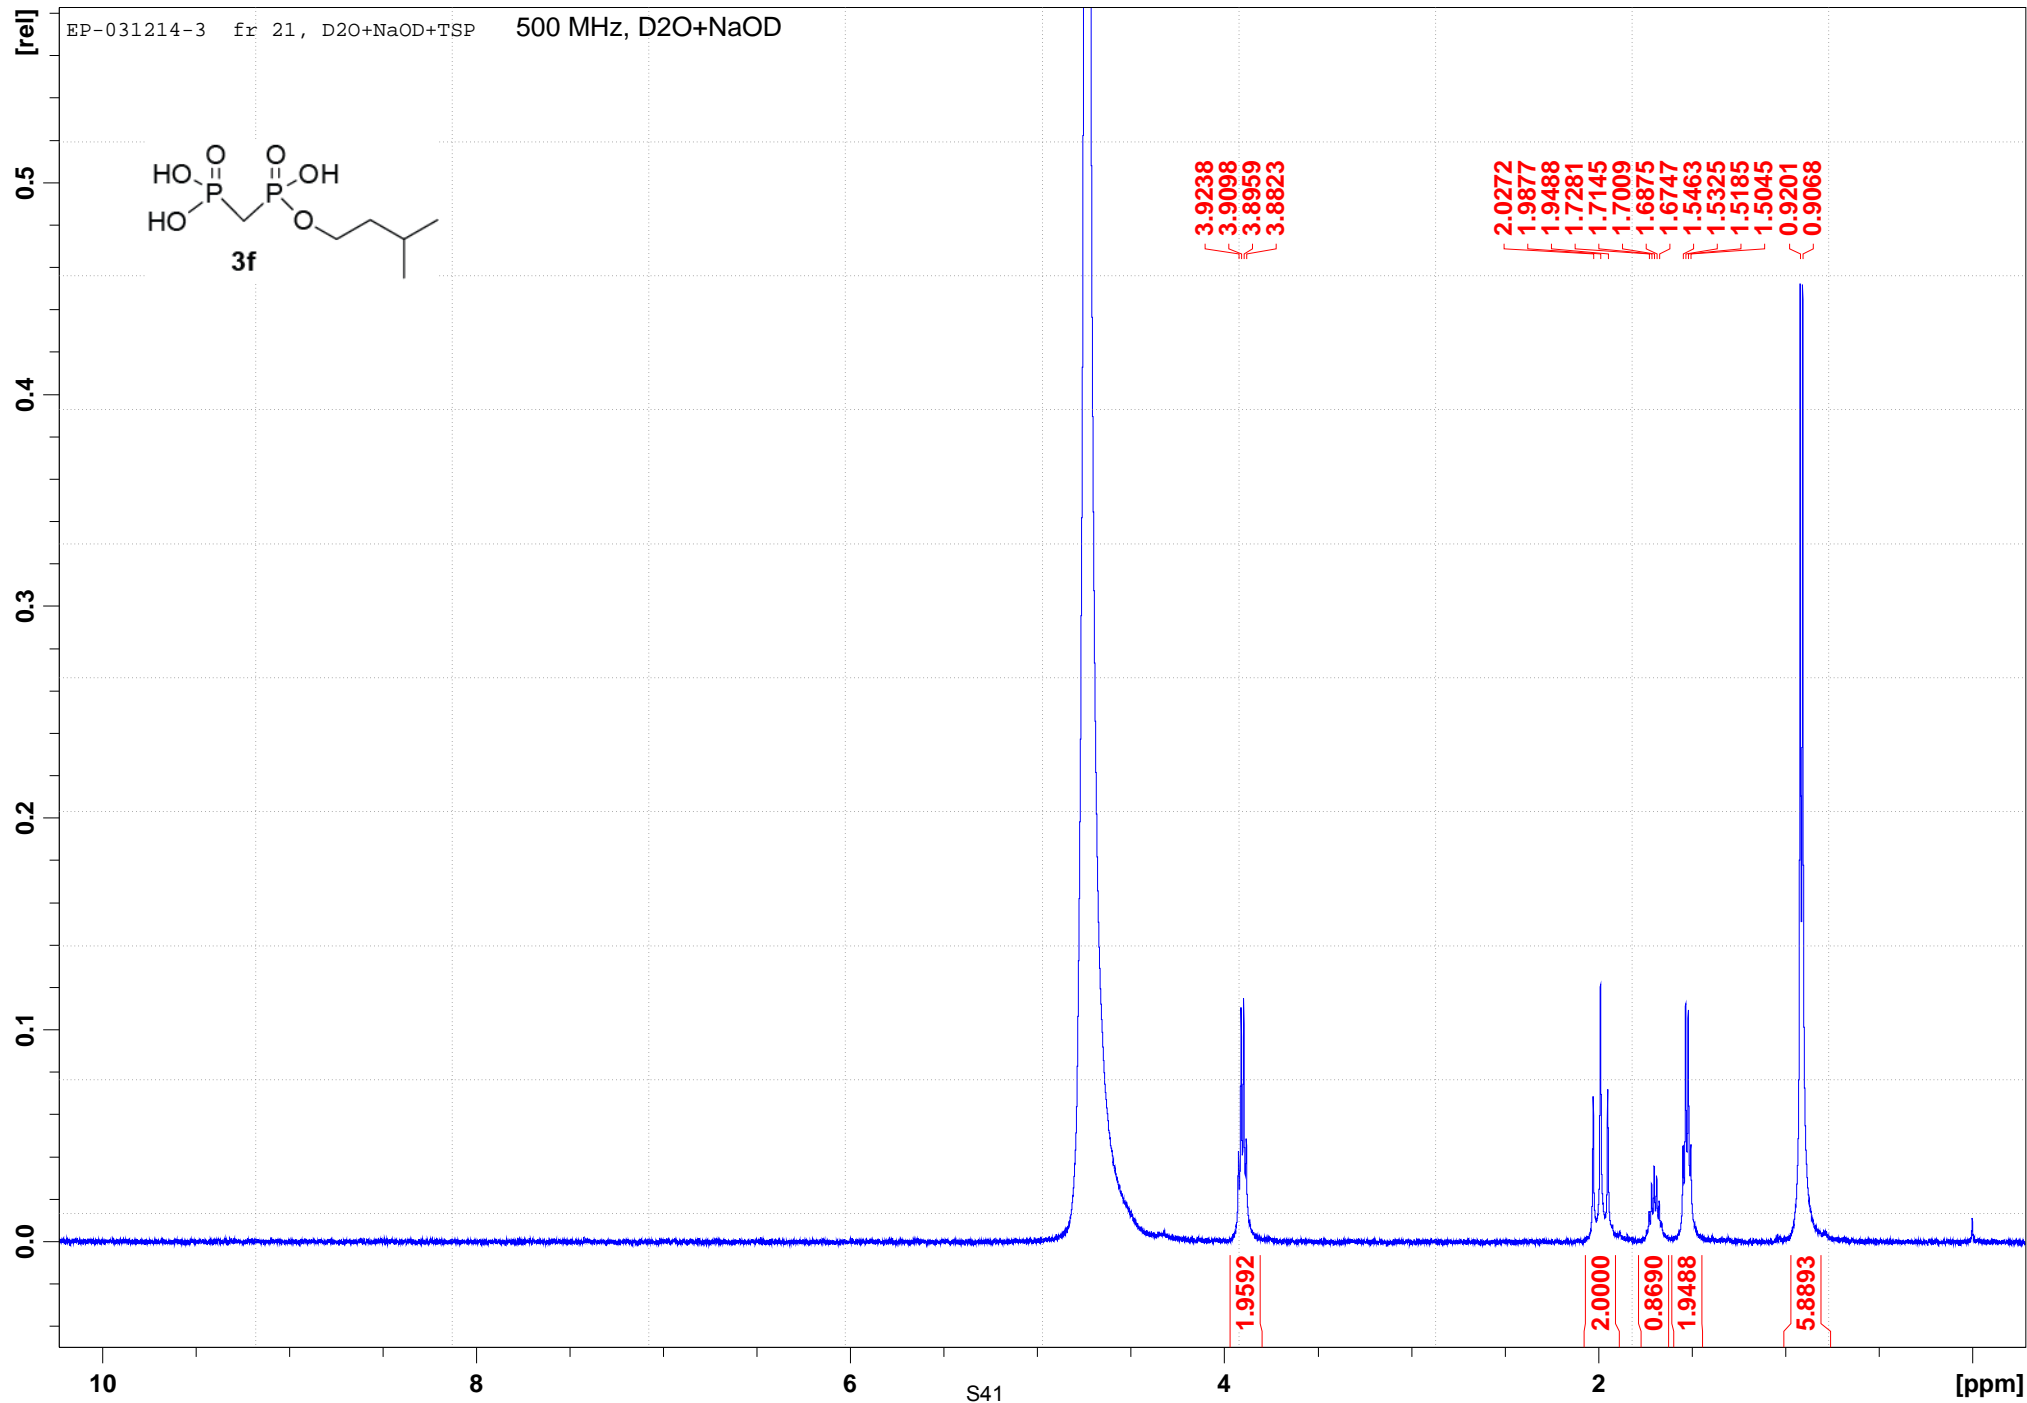

141203-3 76 1 "E:\NMR 2015"

EP-031214-3 fr 21, D2O+NaOD+TSP

126 MHz, D2O+NaOD

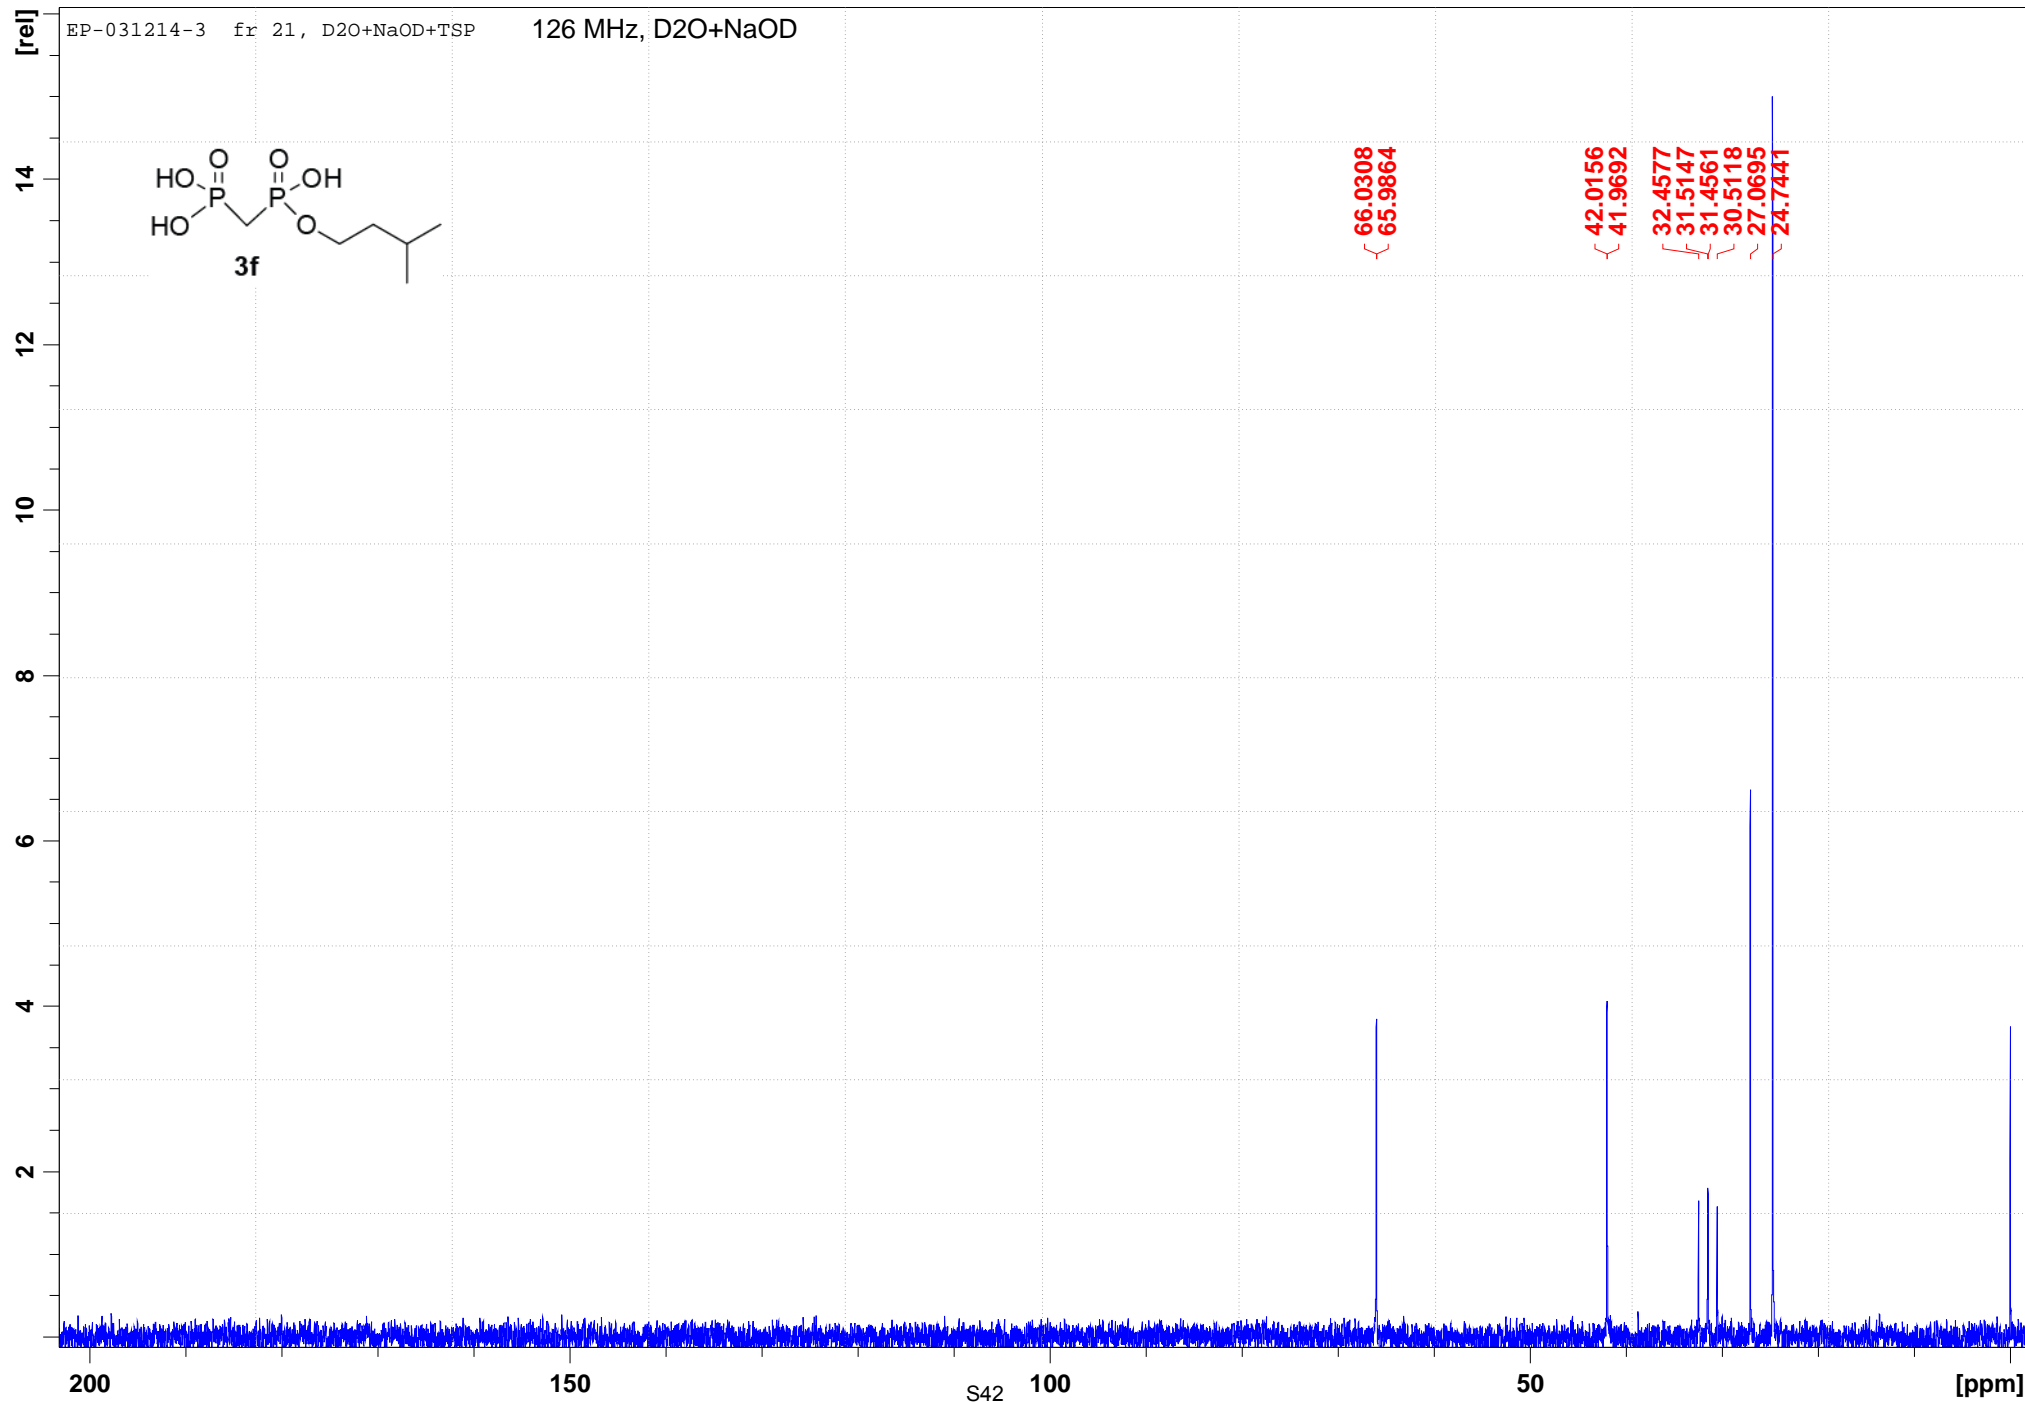

200

150

S42 100

50

[ppm]

141203-3 72 1 "E:\NMR 2015"

EP-031214-3 fr 21, D2O+NaOD+TSP 202 MHz, D2O+NaOD

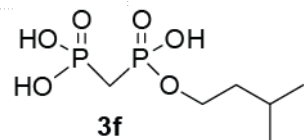

22.3325  
22.2905

11.9310  
11.8890

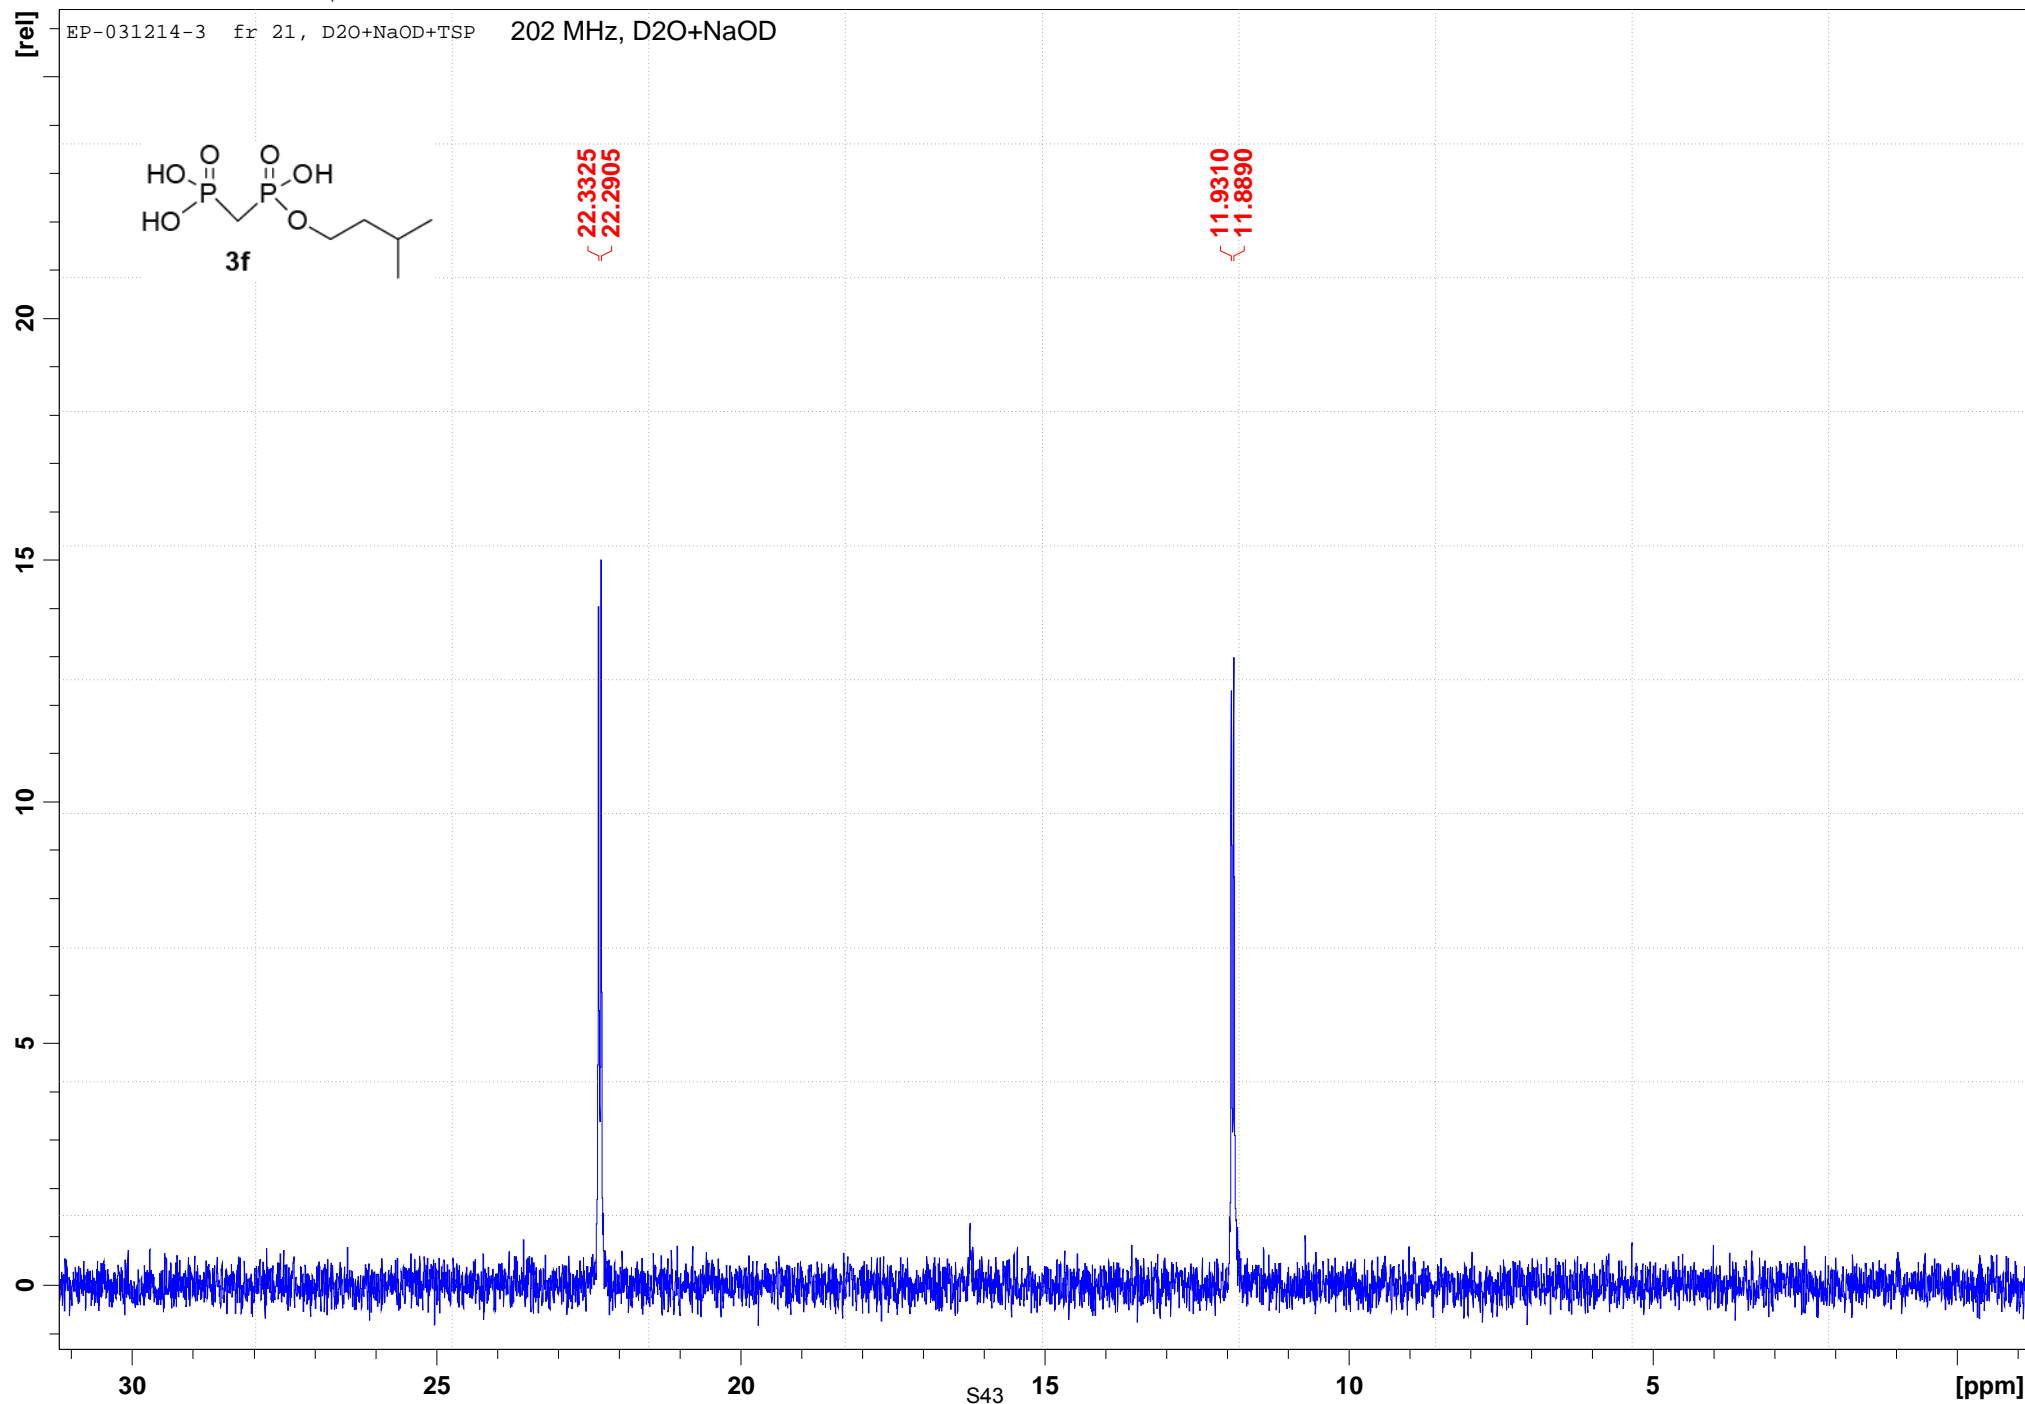

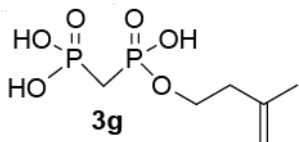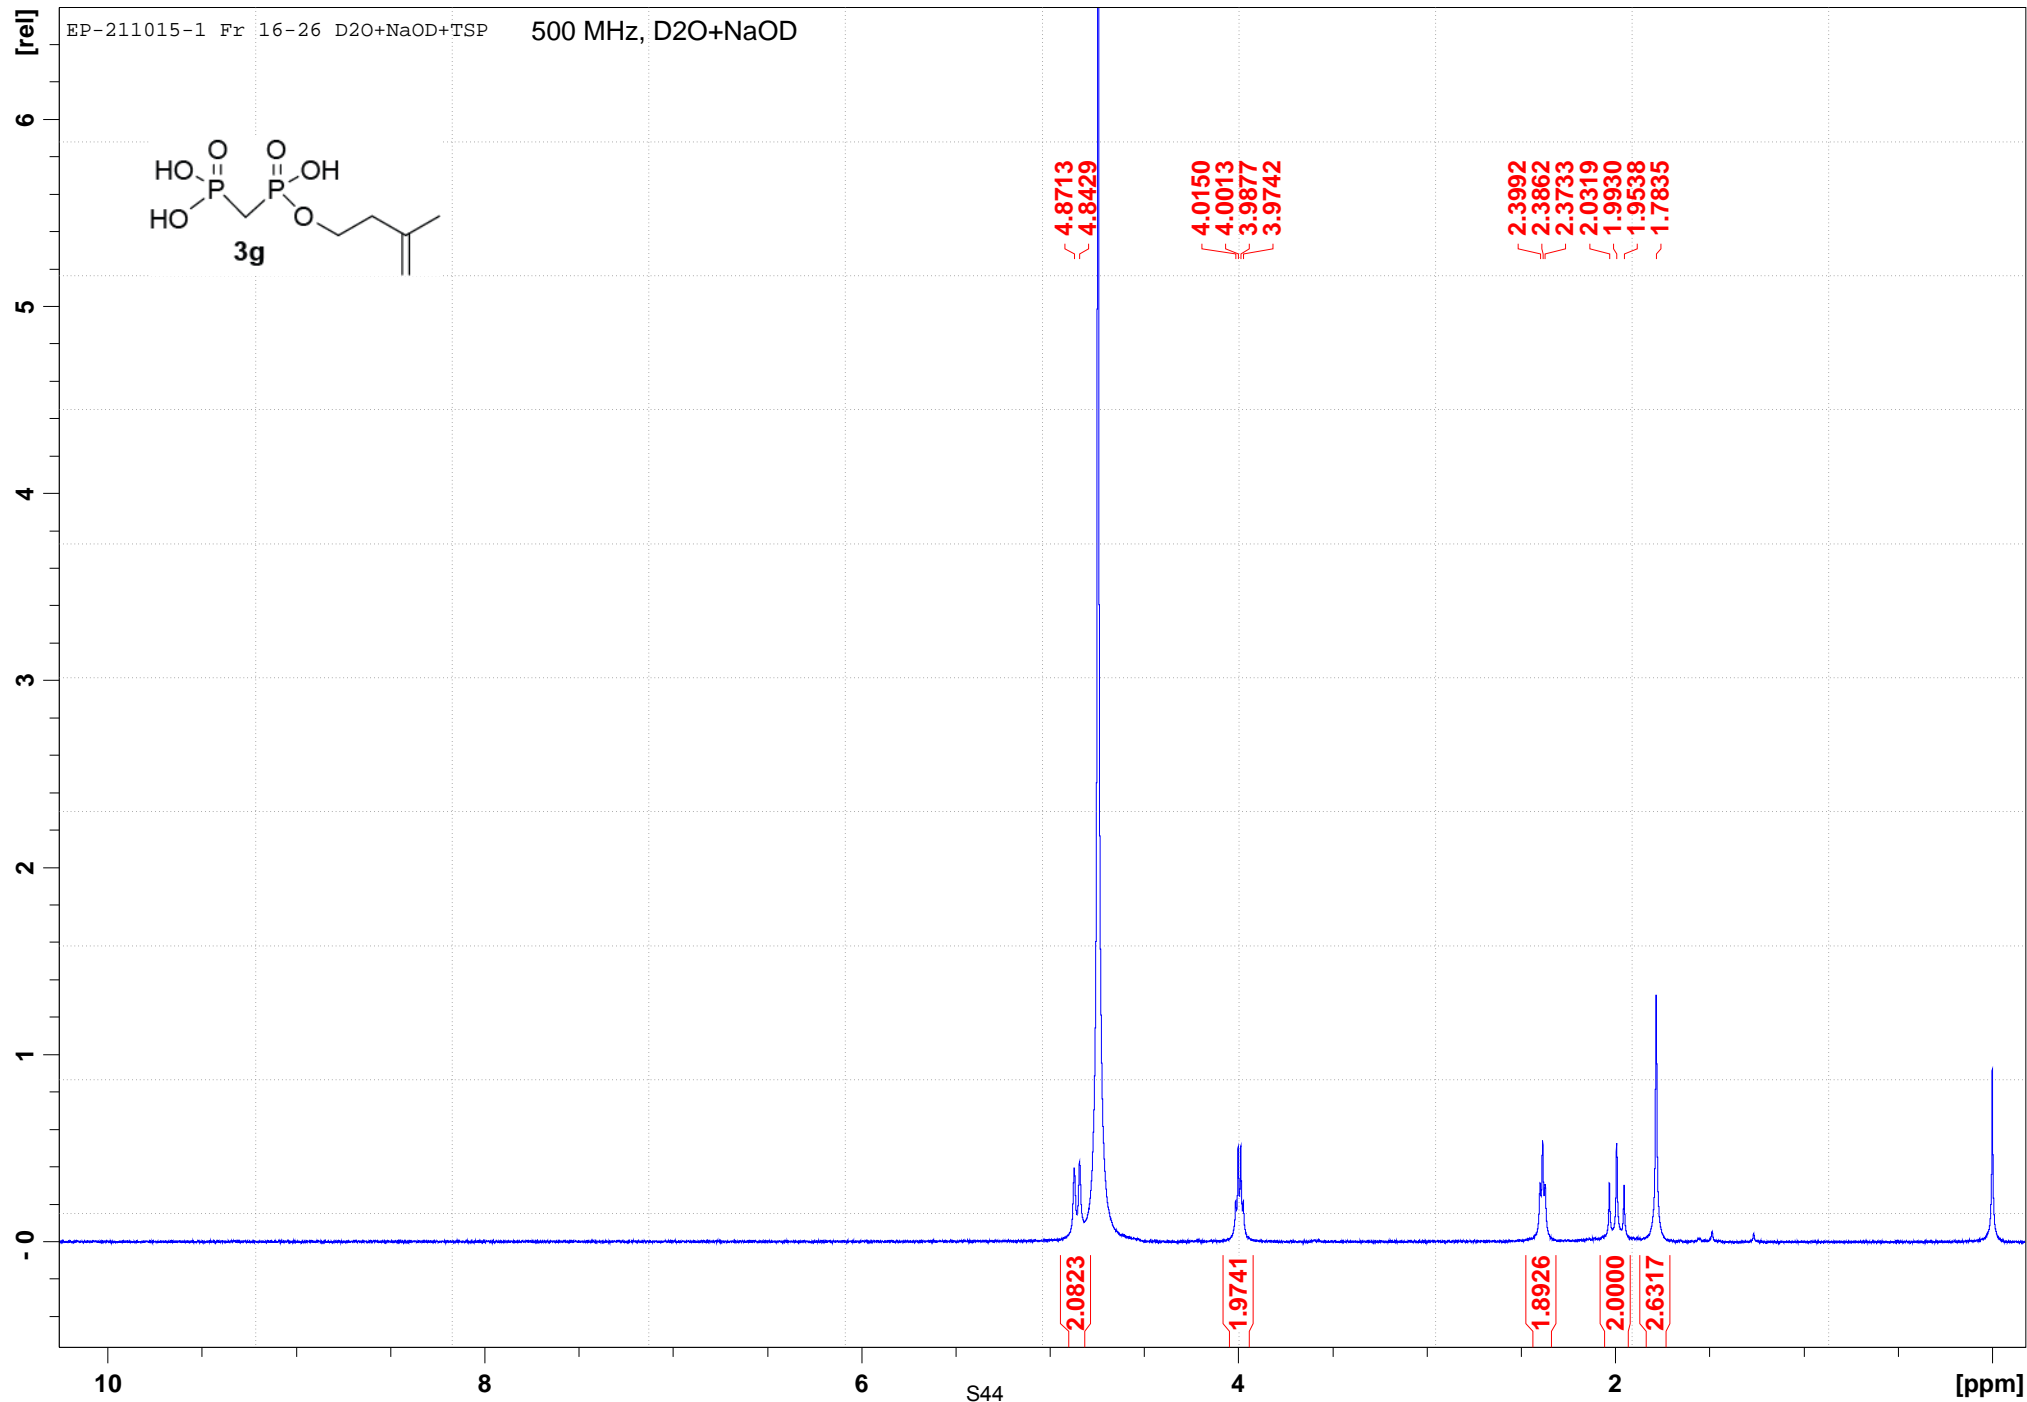

[ppm]

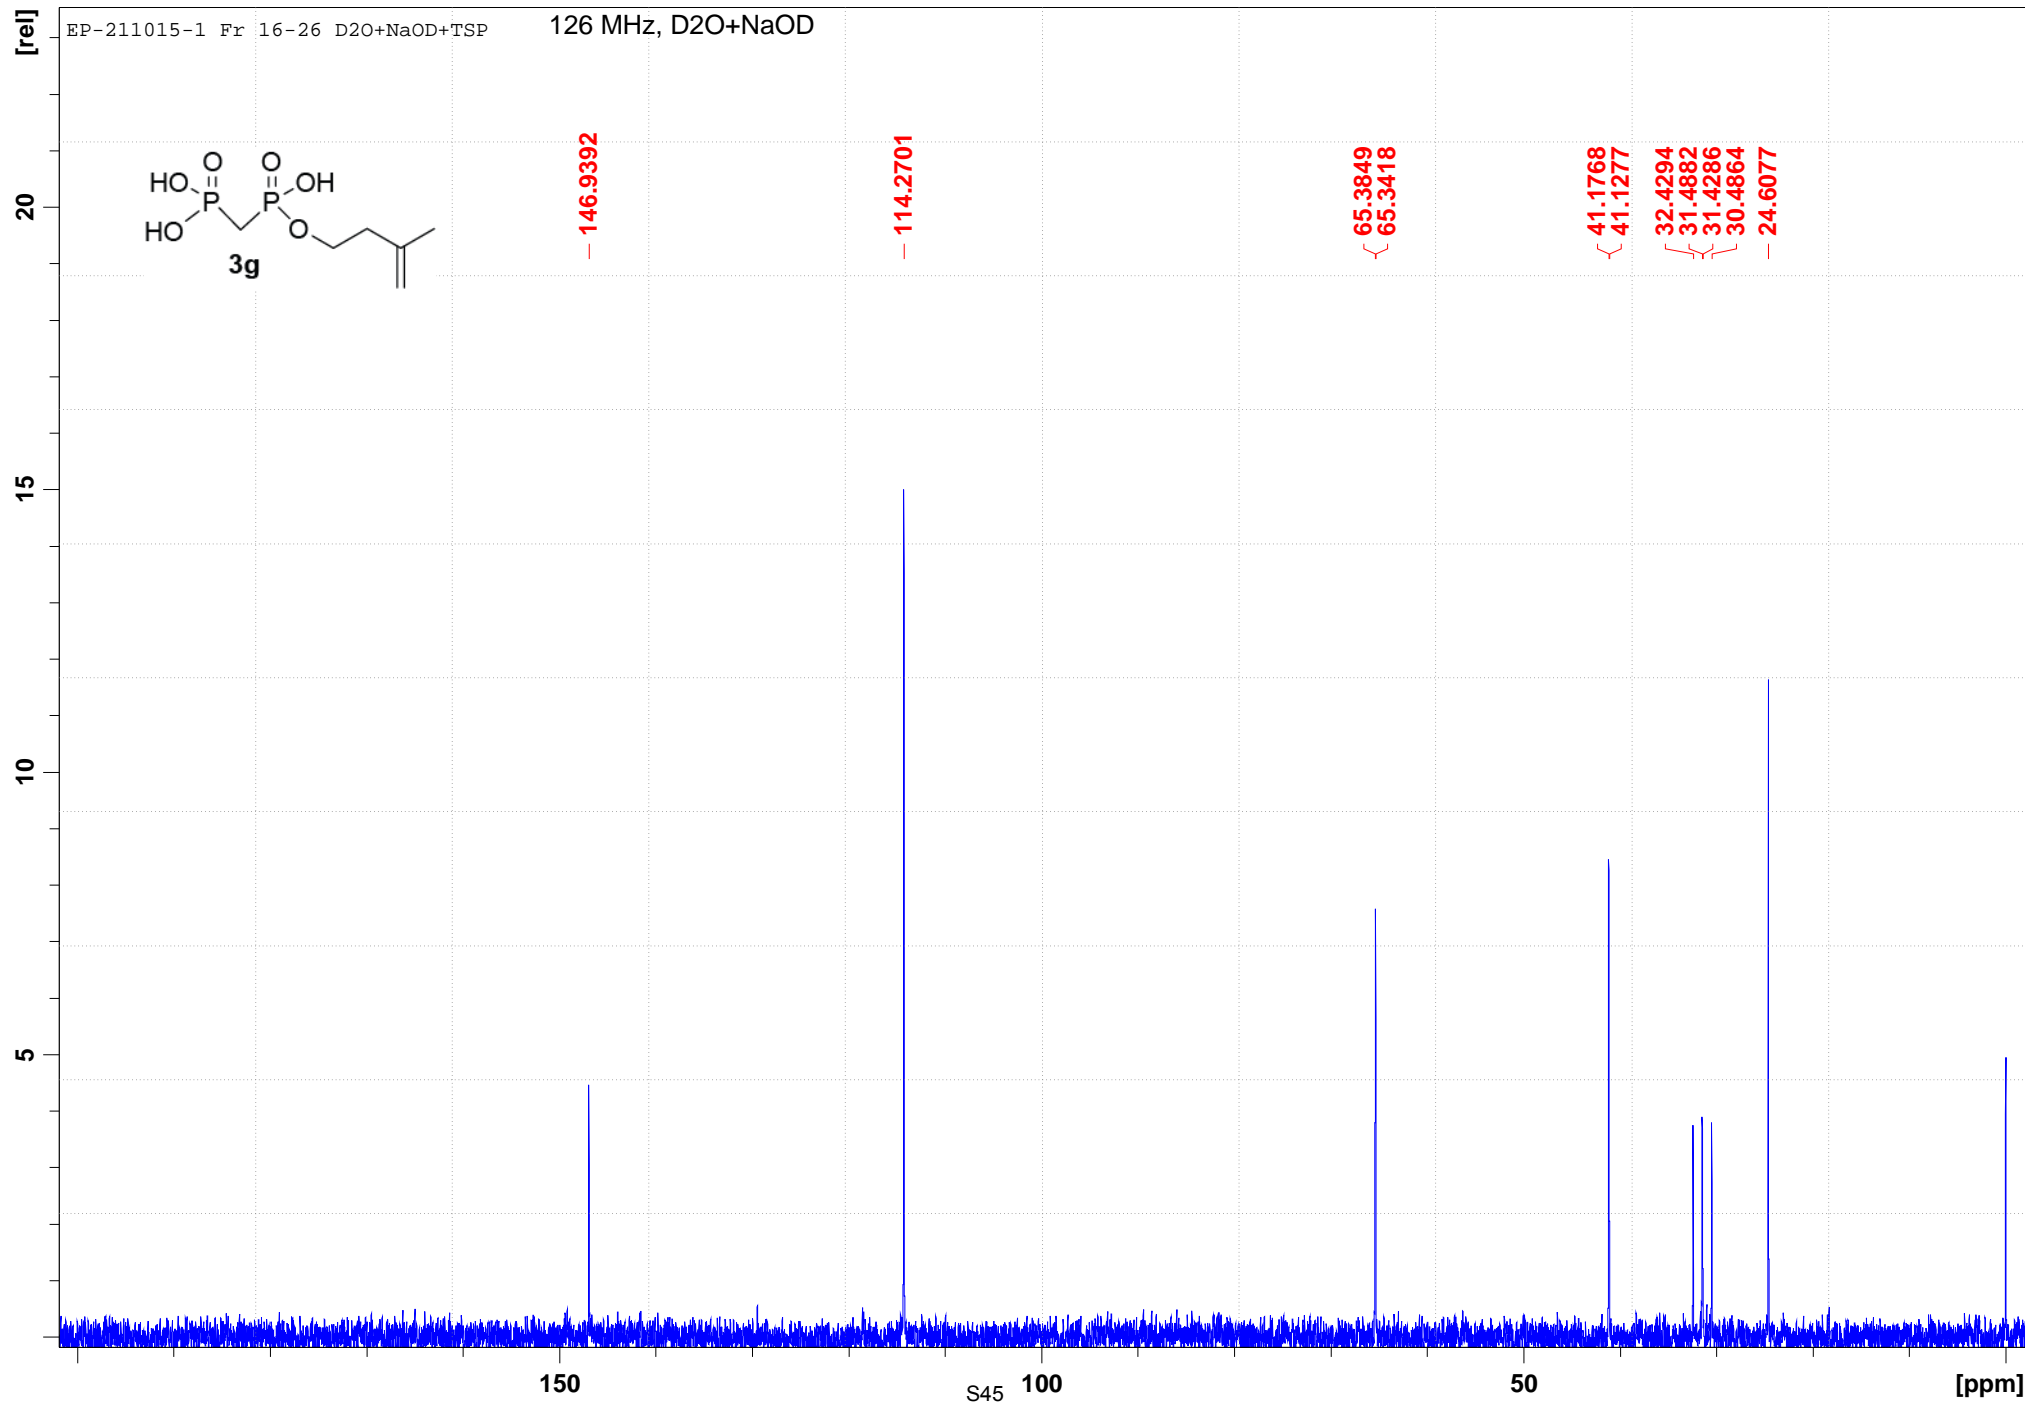

151021-1 72 1 "E:\NMR 2015"

EP 211015-1 HPLCC fr 16-26 D2O+NaOD 202 MHz, D2O+NaOD

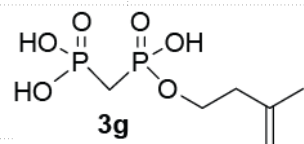

22.4241  
22.3814

11.9529  
11.9102

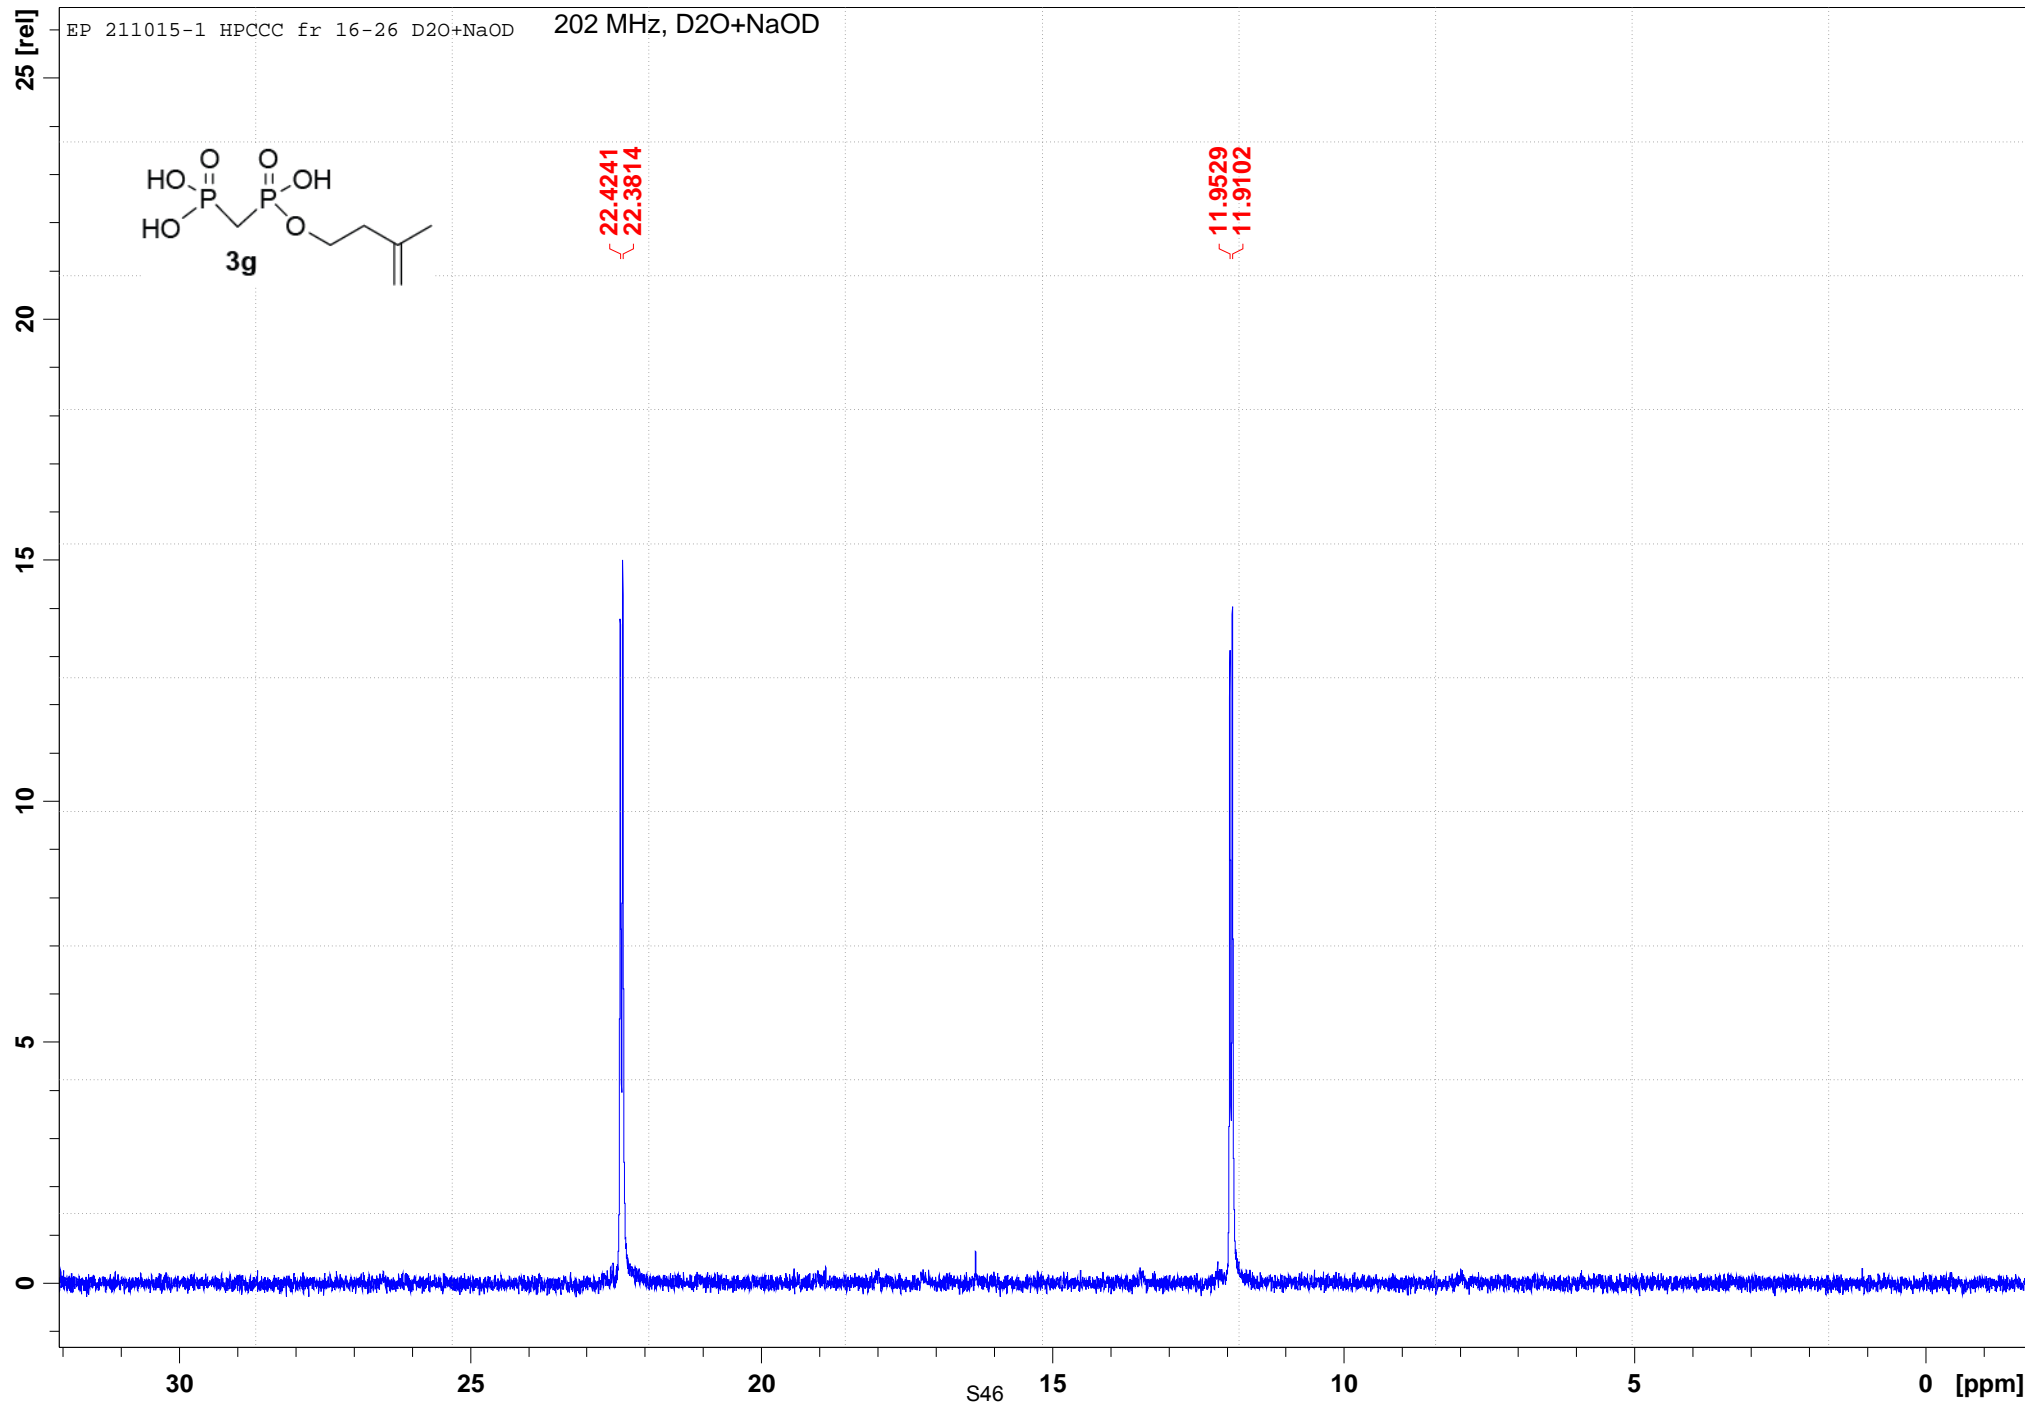

HPCCC chromatogram from the purification of **3g**

Detection by UV at 200 (red), 220 (blue) and 254 (green) nm.

Fractions 1-8: **3g** and medronic acid

Fractions 9-23: **3g**

Fractions 24-26: **3g** and **3g** with one methyl ester remaining

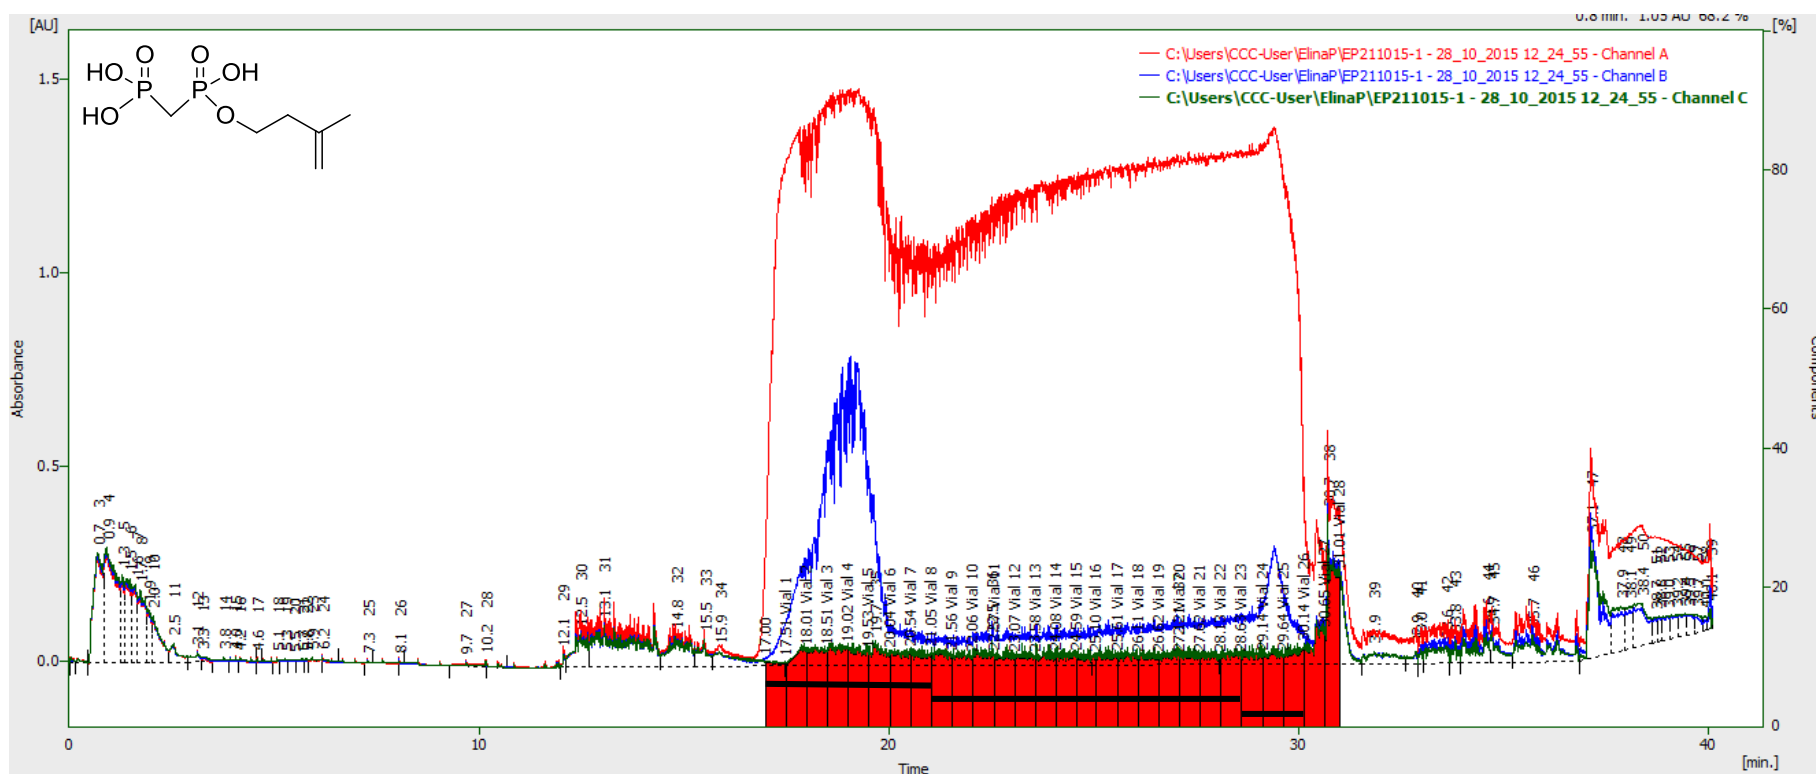

Supplement: Additional file 2 [file 1860-5397-12-204-S2.pdf]
